# Supplementary material for: Downregulation of growth plate genes involved with the onset of femoral head separation in young broilers
Source: Front Physiol. 2022 Aug 8;13:941134. doi: 10.3389/fphys.2022.941134 (PMC9393217; doi:10.3389/fphys.2022.941134)
Supplement: Supplementary file 2 [file Table1.XLSX]

## Sheet: Table_S1
Table S1. Number os paired end reads befor and after quality control with Trimmomatic.
Samples	Input_Read_Pairs	Pairs_Reads	Pairs_Read_Percent	Forward_Only_Surviving_Reads	Forward_Only_Surviving_Read_Percent	Reverse_Only_Surviving_Reads	Reverse_Only_Surviving_Read_Percent	Dropped_Reads	Dropped_Read_Percent
01_N	13023361	12102881	92.93	436277	3.35	321265	2.47	162938	1.25
02_N	15656151	14470817	92.43	594155	3.8	366637	2.34	224542	1.43
01_A	30862153	28459825	92.22	1177294	3.81	748525	2.43	476509	1.54
03_N	20656327	18994497	91.92	414344	4.035	255414	2.48	161157	1.57
04_N	21118909	19405020	91.88	861901	4.08	531533	2.52	320455	1.52
02_A	23648474	21635621	91.435	497661	4.235	308264	2.61	200501	1.71
03_A	25640160	23267640	90.75	1205701	4.7	670493	2.62	496326	1.94
04_A	26069259	24249244	93.02	882471	3.39	620257	2.38	317287	1.22

## Sheet: Table_S2
Table S2. Mapping against chicken genome (GRCg6a) results
	Number_Input_reads	Number_Uniquely_Mapped	Percent_Uniquely_Mapped	Number_Mapped_multiLoci	Percent_Mapped_multiLoci	Number_Mapped_manyLoci	Percent_Mapped_manyLoci	Number_Reads_unmapped.short	Percent_reads_unmapped.short	Number_reads_unmapped.other	Percent_reads_unmapped.other
01_N	12102881	11546691	0.954	114658	0.0095	3339	0.0003	434292	0.0359	3901	0.0003
02_N	14470817	13894847	0.9602	139713	0.0097	8638	0.0006	422748	0.0292	4871	0.0003
01_A	28459825	27253371	0.9576	363709	0.0128	11590	0.0004	823818	0.0289	7337	0.0003
03_N	18994497	18221631	0.9593	205012	0.0108	10940	0.0006	551319	0.029	5595	0.0003
04_N	19405020	18650633	0.9611	178921	0.0092	6627	0.0003	564218	0.0291	4621	0.0002
02_A	21635621	20652548	0.9546	308117	0.0142	8598	0.0004	660454	0.0305	5904	0.0003
03_A	23267640	22281061	0.9576	290283	0.0125	12774	0.0005	677140	0.0291	6382	0.0003
04_A	24249244	23289103	0.9604	237271	0.0098	8044	0.0003	707758	0.0292	7068	0.0003

## Sheet: Table_S3
Table S3. Genes expressed and differentially expressed (underlined) in the growth plate of normal and FHS-affected broilers
Gene Stable ID	AveExp	LogFC	t	P.value	FDR	Gene name	Gene Description	Chromosomescaffold name
ENSGALG00000015253	4.31666	-4.05906	-14.079	6.35659e-08	0.00052938	COL8A1	collagen type VIII alpha 1 chain [Source:NCBI gene;Acc:418378]	1
ENSGALG00000045153	-2.37135	-5.79482	-13.7715	7.85023e-08	0.00052938	SHISA3	shisa family member 3 [Source:NCBI gene;Acc:100857319]	4
ENSGALG00000011663	6.12771	-2.32656	-12.4603	2.03131e-07	0.000913207	FNDC1	fibronectin type III domain containing 1 [Source:NCBI gene;Acc:421589]	3
ENSGALG00000003179	-1.25746	-7.14165	-11.7136	3.63576e-07	0.00122589	ANGPTL7	angiopoietin like 7 [Source:NCBI gene;Acc:101750033]	21
ENSGALG00000011058	1.57732	-2.67345	-10.3463	1.1542e-06	0.00311335	LEPR	leptin receptor [Source:NCBI gene;Acc:374223]	8
ENSGALG00000049529	1.87525	-5.89692	-10.1225	1.41165e-06	0.00317315			1
ENSGALG00000014686	2.06028	-2.97264	-9.36615	2.86856e-06	0.0042987	FBN2	fibrillin 2 [Source:NCBI gene;Acc:374203]	Z
ENSGALG00000028459	1.03496	-5.88494	-9.38173	2.82567e-06	0.0042987	FAM180A	family with sequence similarity 180 member A [Source:NCBI gene;Acc:772003]	1
ENSGALG00000032220	3.70284	-4.88354	-9.5458	2.41387e-06	0.0042987	ELN	elastin [Source:NCBI gene;Acc:396441]	19
ENSGALG00000027184	0.424113	-6.15431	-9.23903	3.24649e-06	0.00437855	OLFML1	olfactomedin like 1 [Source:NCBI gene;Acc:428842]	5
ENSGALG00000005253	5.07434	-3.8745	-8.83795	4.8416e-06	0.00593624	C1QTNF8	C1q and tumor necrosis factor related protein 8 [Source:NCBI gene;Acc:427666]	14
ENSGALG00000006821	0.972531	-4.05127	-8.66478	5.77932e-06	0.00599582	TNMD	tenomodulin [Source:NCBI gene;Acc:404530]	4
ENSGALG00000054999	5.10898	-1.85547	-8.70487	5.54588e-06	0.00599582			23
ENSGALG00000017191	1.63622	-5.47374	-8.29731	8.49385e-06	0.00818262	ANGPTL5	angiopoietin like 5 [Source:NCBI gene;Acc:772036]	1
ENSGALG00000027655	0.677444	-2.39834	-8.16183	9.82203e-06	0.00883132	TRABD2B	TraB domain containing 2B [Source:NCBI gene;Acc:424623]	8
ENSGALG00000017295	0.0537377	-4.06286	-8.06839	1.08689e-05	0.00916184	PTHLH	parathyroid hormone like hormone [Source:NCBI gene;Acc:396281]	1
ENSGALG00000037675	0.407698	-5.81973	-7.23028	2.81011e-05	0.0222941	COL14A1	collagen type XIV alpha 1 chain [Source:NCBI gene;Acc:396276]	2
ENSGALG00000007419	2.74072	-1.9957	-6.98474	3.76773e-05	0.0272618	MASP1	mannan binding lectin serine peptidase 1 [Source:NCBI gene;Acc:407088]	9
ENSGALG00000015307	0.361754	-5.67396	-6.96444	3.8614e-05	0.0272618	ABI3BP		1
ENSGALG00000032161	1.22239	-1.76562	-6.92663	4.04268e-05	0.0272618	SCUBE2	signal peptide CUB domain and EGF like domain containing 2 [Source:NCBI gene;Acc:423049]	5
ENSGALG00000003138	-0.740705	-3.19609	-6.66068	5.61013e-05	0.0331227	OXTR	oxytocin receptor [Source:NCBI gene;Acc:429211]	12
ENSGALG00000041501	-0.155357	-2.95503	-6.66103	5.60764e-05	0.0331227	AMER3	APC membrane recruitment protein 3 [Source:NCBI gene;Acc:100859787]	9
ENSGALG00000045154	-0.796154	-2.39931	-6.65521	5.64856e-05	0.0331227			Z
ENSGALG00000004722	4.27746	-3.27092	-6.57828	6.22064e-05	0.0333159	ASPN	biglycan [Source:NCBI gene;Acc:415954]	12
ENSGALG00000015101	0.621557	-2.06771	-6.56845	6.29814e-05	0.0333159	BNC2	basonuclin 2 [Source:NCBI gene;Acc:431604]	Z
ENSGALG00000026836	6.14338	-1.84159	-6.55293	6.42258e-05	0.0333159	Col16A1	collagen type XVI alpha 1 chain [Source:NCBI gene;Acc:430477]	23
ENSGALG00000012542	0.415784	-1.89534	-6.46637	7.1674e-05	0.0358025	RASD2	RASD family member 2 [Source:NCBI gene;Acc:418057]	1
ENSGALG00000015152	2.80123	-1.61648	-6.43301	7.47884e-05	0.036024	BOC	BOC cell adhesion associated oncogene regulated [Source:NCBI gene;Acc:418361]	1
ENSGALG00000005985	0.437523	-2.34849	-6.40462	7.75548e-05	0.0360683	GDF10	growth differentiation factor 10 [Source:HGNC Symbol;Acc:HGNC:4215]	6
ENSGALG00000032856	-0.573941	-5.10449	-6.25426	9.41657e-05	0.0409681	GFRA2	GDNF family receptor alpha 2 [Source:NCBI gene;Acc:395993]	22
ENSGALG00000054344	0.19034	-2.50548	-6.25537	9.40301e-05	0.0409681			9
ENSGALG00000009755	2.58073	-1.78195	-6.21391	9.92504e-05	0.0418309	LRIG3	leucine rich repeats and immunoglobulin like domains 3 [Source:NCBI gene;Acc:417813]	1
ENSGALG00000006757	5.54503	-1.27059	-6.17221	0.000104817	0.0428383	XYLT1	xylosyltransferase 1 [Source:NCBI gene;Acc:414781]	14
ENSGALG00000012362	0.497106	-1.87987	-6.09044	0.000116733	0.0463053	THSD7B	thrombospondin type 1 domain containing 7B [Source:NCBI gene;Acc:424297]	7
ENSGALG00000003324	2.22771	-2.90977	-5.95421	0.000139949	0.0532446	PRRX1	paired related homeobox 1 [Source:NCBI gene;Acc:373941]	8
ENSGALG00000013207	4.07369	-0.746012	-5.94272	0.000142122	0.0532446	CTNNAL1	catenin alpha like 1 [Source:NCBI gene;Acc:100858912]	2
ENSGALG00000002955	4.38461	-0.695397	-5.80389	0.000171459	0.0591186	ADAMTSL2	ADAMTS like 2 [Source:NCBI gene;Acc:417147]	17
ENSGALG00000006758	4.24433	-0.991092	-5.77827	0.000177551	0.0591186	C1QTNF5	C1q and tumor necrosis factor related protein 5 [Source:NCBI gene;Acc:769989]	24
ENSGALG00000016511	-0.0847459	-4.73866	-5.82042	0.000167647	0.0591186	ADGRG2	adhesion G protein-coupled receptor G2 [Source:NCBI gene;Acc:418611]	1
ENSGALG00000044293	0.949624	-2.15291	-5.83257	0.000164903	0.0591186			9
ENSGALG00000046616	6.59364	-1.34625	-5.76938	0.000179718	0.0591186	CHGB	chromogranin B [Source:NCBI gene;Acc:421312]	3
ENSGALG00000017075	4.73074	-0.999054	-5.74115	0.000186795	0.0599833	FRY	FRY microtubule binding protein [Source:NCBI gene;Acc:418915]	1
ENSGALG00000030836	0.855849	-1.76083	-5.71519	0.000193565	0.060712	PSD2	pleckstrin and Sec7 domain containing 2 [Source:NCBI gene;Acc:427605]	13
ENSGALG00000000402	6.79437	-1.38471	-5.67872	0.000203528	0.0612748	LOXL2	lysyl oxidase like 2 [Source:NCBI gene;Acc:419533]	22
ENSGALG00000013617	5.45766	-1.66507	-5.66166	0.000208376	0.0612748	PDGFRL	platelet derived growth factor receptor like [Source:NCBI gene;Acc:769077]	4
ENSGALG00000034973	4.09296	-1.07189	-5.64397	0.000213533	0.0612748	FZD7	frizzled class receptor 7 [Source:NCBI gene;Acc:374060]	7
ENSGALG00000040768	0.263358	-1.62283	-5.65622	0.000209945	0.0612748	MAL2	mal T-cell differentiation protein 2 [Source:NCBI gene;Acc:420280]	2
ENSGALG00000015908	8.91625	-1.10677	-5.61479	0.000222342	0.0624736	COL12A1	collagen type XII alpha 1 chain [Source:NCBI gene;Acc:395875]	3
ENSGALG00000016055	1.88254	-1.07195	-5.57888	0.00023372	0.0643303	KCNJ15	potassium inwardly rectifying channel subfamily J member 15 [Source:NCBI gene;Acc:427984]	1
ENSGALG00000039376	0.997821	-6.36393	-5.54708	0.000244321	0.0659033	DPT	dermatopontin [Source:NCBI gene;Acc:768904]	1
ENSGALG00000039525	2.05228	-1.07551	-5.52092	0.000253425	0.0670185		calmodulin binding transcription activator 1 [Source:NCBI gene;Acc:419369]	21
ENSGALG00000009042	0.741309	-2.37383	-5.45575	0.000277728	0.0715009	ISM1	isthmin 1 [Source:NCBI gene;Acc:416740]	3
ENSGALG00000037901	6.78449	-0.541422	-5.44751	0.000280978	0.0715009	EFEMP1	EGF containing fibulin like extracellular matrix protein 1 [Source:NCBI gene;Acc:428543]	3
ENSGALG00000008815	0.857226	-1.48963	-5.42188	0.000291334	0.0727635	LRRN4	leucine rich repeat neuronal 4 [Source:NCBI gene;Acc:427686]	3
ENSGALG00000002789	1.23762	-1.19291	-5.32846	0.000332703	0.0748612	MAP2	microtubule associated protein 2 [Source:NCBI gene;Acc:424001]	7
ENSGALG00000007804	6.69377	-0.736098	-5.32435	0.000334663	0.0748612	GXYLT2	glucoside xylosyltransferase 2 [Source:NCBI gene;Acc:416097]	12
ENSGALG00000010133	5.08728	-1.21937	-5.33569	0.000329288	0.0748612	PTCH2	patched 2 [Source:NCBI gene;Acc:374187]	8
ENSGALG00000010664	1.11911	-1.9313	-5.33906	0.000327706	0.0748612	KIF26B	kinesin family member 26B [Source:NCBI gene;Acc:100859813]	3
ENSGALG00000016391	0.876777	-1.34149	-5.33253	0.000330776	0.0748612	CNKSR2	connector enhancer of kinase suppressor of Ras 2 [Source:NCBI gene;Acc:427997]	1
ENSGALG00000027207	2.00501	-3.22576	-5.32994	0.000332002	0.0748612	PERP2	PERP2 TP53 apoptosis effector [Source:NCBI gene;Acc:421682]	3
ENSGALG00000037011	6.38928	-1.40535	-5.30482	0.000344138	0.0748612	CILP2	cartilage intermediate layer protein 2 [Source:HGNC Symbol;Acc:HGNC:24213]	28
ENSGALG00000043035	4.99963	-1.73975	-5.3062	0.000343459	0.0748612	SHISA2	shisa family member 2 [Source:NCBI gene;Acc:395162]	1
ENSGALG00000053000	6.61401	-0.768941	-5.27039	0.000361552	0.0774007	DNAAF9	chromosome 4 open reading frame human C20orf194 [Source:NCBI gene;Acc:422945]	4
ENSGALG00000003137	3.42113	-1.36135	-5.24807	0.00037334	0.0786755	RFLNA	refilin A [Source:NCBI gene;Acc:771797]	15
ENSGALG00000005554	3.18933	-2.40725	-5.13362	0.00044061	0.0895645	ADIPOQ	adiponectin C1Q and collagen domain containing [Source:NCBI gene;Acc:404536]	9
ENSGALG00000009241	2.98645	-1.06563	-5.13105	0.000442261	0.0895645	SFRP2	secreted frizzled related protein 2 [Source:NCBI gene;Acc:395546]	4
ENSGALG00000013948	3.1679	-1.20446	-5.12691	0.000444934	0.0895645	RASL11B	RAS like family 11 member B [Source:NCBI gene;Acc:422756]	4
ENSGALG00000011283	0.23718	-1.34327	-5.10539	0.00045912	0.0897413		zinc finger protein 385D [Source:NCBI gene;Acc:420651]	2
ENSGALG00000012407	1.46741	-3.1015	-5.10722	0.000457894	0.0897413	LRP1B	LDL receptor related protein 1B [Source:NCBI gene;Acc:424301]	7
ENSGALG00000007515	1.39195	-4.65068	-5.03533	0.000508737	0.0939909	SFRP5	secreted frizzled related protein 5 [Source:NCBI gene;Acc:423838]	6
ENSGALG00000026983	3.05273	-1.75016	-5.05271	0.000495917	0.0939909	CHRD	chordin [Source:NCBI gene;Acc:395828]	9
ENSGALG00000034067	7.92899	-1.87806	-5.06194	0.000489247	0.0939909	FMOD	fibromodulin [Source:NCBI gene;Acc:395814]	26
ENSGALG00000039935	0.920481	-1.69141	-5.03918	0.000505868	0.0939909	PDE1C	phosphodiesterase 1C [Source:NCBI gene;Acc:420752]	2
ENSGALG00000029509	0.889382	-2.1501	-5.025	0.000516523	0.0941399	NECAB1	N-terminal EF-hand calcium binding protein 1 [Source:NCBI gene;Acc:420219]	2
ENSGALG00000000442	-0.0835491	-1.60567	-4.98395	0.000548751	0.0943281	KCNA2	potassium voltage-gated channel subfamily A member 2 [Source:NCBI gene;Acc:395117]	26
ENSGALG00000010259	2.93395	-3.24569	-4.98867	0.000544937	0.0943281	COL28A1	collagen type XXVIII alpha 1 chain [Source:NCBI gene;Acc:420576]	2
ENSGALG00000013674	-0.486598	-1.81014	-4.97609	0.000555157	0.0943281	TUSC3	tumor suppressor candidate 3 [Source:NCBI gene;Acc:422738]	4
ENSGALG00000040705	0.506731	-1.4564	-4.98958	0.000544208	0.0943281			18
ENSGALG00000046412	1.30757	-2.2721	-4.9708	0.00055952	0.0943281		amine oxidase	copper containing 3 [Source:NCBI gene;Acc:420015]	27
ENSGALG00000055061	-0.38201	-1.95829	-4.99505	0.000539833	0.0943281			3
ENSGALG00000000927	6.77335	-1.26454	-4.93506	0.000589947	0.0958629	ANGPTL2	angiopoietin-like 2 [Source:NCBI gene;Acc:776031]	17
ENSGALG00000001392	3.98111	-1.11652	-4.93992	0.000585711	0.0958629	MMP23B	matrix metallopeptidase 23A (pseudogene) [Source:NCBI gene;Acc:419407]	21
ENSGALG00000032143	5.21088	-1.20573	-4.94383	0.000582319	0.0958629	CRISPLD2	cysteine rich secretory protein LCCL domain containing 2 [Source:NCBI gene;Acc:415818]	11
ENSGALG00000011609	0.703541	-1.28011	-4.88817	0.000632564	0.101564			5
ENSGALG00000046358	5.13168	-1.84066	-4.85802	0.000661694	0.104991	FBLN7	fibulin 7 [Source:NCBI gene;Acc:421229]	3
ENSGALG00000002298	3.49571	-1.47808	-4.81658	0.000704079	0.109192	COL8A2	collagen type VIII alpha 2 chain [Source:NCBI gene;Acc:428221]	23
ENSGALG00000004538	3.59882	-2.4498	-4.80819	0.000713011	0.109192	TNN	tenascin N [Source:NCBI gene;Acc:424435]	8
ENSGALG00000044851	3.03998	-1.26023	-4.79954	0.000722343	0.109192		inter-alpha-trypsin inhibitor heavy chain family member 6 [Source:NCBI gene;Acc:430871]	KZ626836.1
ENSGALG00000047024	5.84655	-0.920195	-4.8002	0.000721619	0.109192	ZNF469	zinc finger protein 469 [Source:NCBI gene;Acc:101748749]	11
ENSGALG00000055058	3.80516	-1.17774	-4.79376	0.00072865	0.109192		proline and serine rich 2 [Source:NCBI gene;Acc:419101]	1
ENSGALG00000003473	4.29783	-1.7953	-4.76052	0.000766072	0.113539	SFRP1	secreted frizzled related protein 1 [Source:NCBI gene;Acc:395237]	22
ENSGALG00000045305	-0.323118	-2.32353	-4.72446	0.000808988	0.118596			1
ENSGALG00000039344	-0.814026	-2.41924	-4.70145	0.000837719	0.120309		uncharacterized LOC107055134 [Source:NCBI gene;Acc:107055134]	25
ENSGALG00000048849	1.46757	-2.32991	-4.70082	0.000838515	0.120309			6
ENSGALG00000008440	2.78807	-2.54345	-4.66882	0.000880306	0.121614	CHST1	carbohydrate sulfotransferase 1 [Source:NCBI gene;Acc:428866]	5
ENSGALG00000016361	1.4102	-1.3559	-4.66982	0.000878978	0.121614	FAM110C	family with sequence similarity 110 member C [Source:NCBI gene;Acc:100859913]	3
ENSGALG00000027887	7.26799	-2.35025	-4.68096	0.000864197	0.121614		C1q and tumor necrosis factor related protein 3 [Source:NCBI gene;Acc:427430]	Z
ENSGALG00000041834	7.29812	-0.680677	-4.66631	0.000883677	0.121614	AEBP1	AE binding protein 1 [Source:NCBI gene;Acc:100859431]	22
ENSGALG00000009948	3.61807	-0.945526	-4.6549	0.000899182	0.122498	HHIP	hedgehog interacting protein [Source:NCBI gene;Acc:422460]	4
ENSGALG00000012908	-1.32112	-2.99439	-4.63251	0.000930431	0.123293	SLC13A4	solute carrier family 13 member 4 [Source:NCBI gene;Acc:418127]	1
ENSGALG00000014923	2.455	-1.64571	-4.63754	0.000923306	0.123293	ARHGEF28	Rho guanine nucleotide exchange factor 28 [Source:NCBI gene;Acc:427201]	Z
ENSGALG00000039216	8.80725	-1.07697	-4.63109	0.000932447	0.123293	COL6A2	collagen type VI alpha 2 chain [Source:NCBI gene;Acc:396292]	7
ENSGALG00000001620	3.12584	-2.08067	-4.59115	0.000991224	0.12741		cutA divalent cation tolerance homolog [Source:NCBI gene;Acc:417124]	17
ENSGALG00000005209	6.93242	-1.11767	-4.59069	0.000991923	0.12741	AQP1	aquaporin 1 [Source:NCBI gene;Acc:420384]	2
ENSGALG00000010794	2.15487	-2.18657	-4.59766	0.000981392	0.12741	MEOX2	mesenchyme homeobox 2 [Source:NCBI gene;Acc:374137]	2
ENSGALG00000054304	2.67948	-1.24203	-4.55961	0.00104041	0.132378			5
ENSGALG00000026395	-0.673477	-1.98822	-4.5506	0.00105494	0.132972	TRABD2A	TraB domain containing 2A [Source:NCBI gene;Acc:427288]	Z
ENSGALG00000027232	-0.00833045	-3.43469	-4.51957	0.00110662	0.137526	C1QTNF2	C1q and tumor necrosis factor related protein 2 [Source:NCBI gene;Acc:416156]	13
ENSGALG00000040759	5.02083	-1.47888	-4.51674	0.00111147	0.137526	CPXM1	carboxypeptidase X	M14 family member 1 [Source:NCBI gene;Acc:100858707]	4
ENSGALG00000013900	-0.319003	-1.69739	-4.49393	0.00115134	0.141165	MAP7	microtubule associated protein 7 [Source:NCBI gene;Acc:421689]	3
ENSGALG00000010668	1.75883	-1.03054	-4.4797	0.00117699	0.141515	WWC2	WW and C2 domain containing 2 [Source:NCBI gene;Acc:422555]	4
ENSGALG00000015040	4.67344	-0.645622	-4.48443	0.0011684	0.141515	SLC16A10	solute carrier family 16 member 10 [Source:NCBI gene;Acc:421753]	3
ENSGALG00000032467	3.28771	-0.875863	-4.47496	0.00118568	0.141515	C11orf52	chromosome 24 open reading frame	human C11orf52 [Source:NCBI gene;Acc:770939]	24
ENSGALG00000038355	2.23328	-1.70415	-4.45801	0.00121725	0.14401	GDF5	growth differentiation factor 5 [Source:NCBI gene;Acc:374249]	20
ENSGALG00000009248	2.65543	-0.842611	-4.44925	0.00123392	0.144556	HSPA12A	heat shock protein family A (Hsp70) member 12A [Source:NCBI gene;Acc:423917]	6
ENSGALG00000033966	1.8041	-1.58262	-4.44438	0.0012433	0.144556	TENM4	teneurin transmembrane protein 4 [Source:NCBI gene;Acc:395406]	1
ENSGALG00000004504	2.77702	-1.21385	-4.43564	0.00126031	0.14528		Ras associating with DIL domains [Source:NCBI gene;Acc:416479]	14
ENSGALG00000000244	2.53795	-1.53275	-4.4101	0.00131142	0.148816	CAMK4	calcium/calmodulin dependent protein kinase IV [Source:NCBI gene;Acc:723973]	Z
ENSGALG00000014337	-0.938843	-2.46636	-4.40043	0.00133135	0.148816	NWD2	NACHT and WD repeat domain containing 2 [Source:NCBI gene;Acc:428789]	4
ENSGALG00000035701	4.74785	-0.698808	-4.39335	0.00134615	0.148816	SMAD3	SMAD family member 3 [Source:NCBI gene;Acc:395132]	10
ENSGALG00000035927	1.88065	-1.0605	-4.40371	0.00132457	0.148816	ST8SIA5	ST8 alpha-N-acetyl-neuraminide alpha-2	8-sialyltransferase 5 [Source:NCBI gene;Acc:414797]	Z
ENSGALG00000043025	2.98746	-1.4515	-4.39516	0.00134236	0.148816			5
ENSGALG00000011291	4.85579	-0.499223	-4.37875	0.00137721	0.14902	NR1D2	nuclear receptor subfamily 1 group D member 2 [Source:NCBI gene;Acc:396125]	2
ENSGALG00000014042	5.57878	-0.826251	-4.38094	0.00137249	0.14902	SSPN	sarcospan [Source:NCBI gene;Acc:418211]	1
ENSGALG00000016785	2.38709	-2.84098	-4.37692	0.00138115	0.14902	IL1RL1	interleukin 1 receptor like 1 [Source:NCBI gene;Acc:374136]	1
ENSGALG00000002554	5.61708	-0.604074	-4.36449	0.00140828	0.150742	TSPAN2	tetraspanin 2 [Source:NCBI gene;Acc:419889]	26
ENSGALG00000029072	0.090327	-2.47418	-4.326	0.00149588	0.157854	NTN3	netrin 1 [Source:NCBI gene;Acc:396387]	14
ENSGALG00000032506	3.25279	-1.59522	-4.32504	0.00149813	0.157854	GEM	GTP binding protein overexpressed in skeletal muscle [Source:NCBI gene;Acc:404771]	2
ENSGALG00000006034	2.1987	-0.935831	-4.30541	0.00154509	0.160297	PITPNM3	PITPNM family member 3 [Source:NCBI gene;Acc:417684]	19
ENSGALG00000009725	1.51169	-1.08614	-4.30733	0.00154041	0.160297	SCG5	secretogranin V [Source:NCBI gene;Acc:769742]	5
ENSGALG00000032239	5.05912	1.09335	4.29523	0.00157003	0.160461	GCHFR	GTP cyclohydrolase I feedback regulator [Source:NCBI gene;Acc:423003]	5
ENSGALG00000054145	-0.681135	-2.36419	-4.29506	0.00157047	0.160461			10
ENSGALG00000015428	4.43358	-0.771972	-4.27699	0.00161581	0.163853		pleckstrin and Sec7 domain containing 3 [Source:HGNC Symbol;Acc:HGNC:19093]	Z
ENSGALG00000012620	5.13536	-0.772534	-4.2715	0.00162986	0.164045	PTCH1	patched 1 [Source:NCBI gene;Acc:395806]	Z
ENSGALG00000002452	2.53157	-1.4287	-4.26362	0.00165027	0.164704	AQP3	aquaporin 3 (Gill blood group) [Source:NCBI gene;Acc:426894]	Z
ENSGALG00000006080	7.41129	-1.08406	-4.25958	0.00166084	0.164704	GPC4	glypican 4 [Source:NCBI gene;Acc:422234]	4
ENSGALG00000043167	5.15638	-1.65982	-4.23966	0.00171398	0.168733	TNFRSF11B	TNF receptor superfamily member 11b [Source:NCBI gene;Acc:378803]	2
ENSGALG00000052526	0.632009	-1.01804	-4.22778	0.00174651	0.17069		uncharacterized LOC107054877 [Source:NCBI gene;Acc:107054877]	20
ENSGALG00000026471	4.86568	-0.664934	-4.21812	0.00177346	0.172077	CRIP2	cysteine rich protein 2 [Source:NCBI gene;Acc:424374]	8
ENSGALG00000010448	8.16434	-0.971642	-4.19589	0.00183713	0.175726	LTBP1	latent transforming growth factor beta binding protein 1 [Source:NCBI gene;Acc:421461]	3
ENSGALG00000011630	5.30714	-0.607322	-4.19661	0.00183501	0.175726	GLI2	GLI family zinc finger 2 [Source:NCBI gene;Acc:395956]	7
ENSGALG00000005974	8.35517	-0.881991	-4.17492	0.0018994	0.179141	COL6A1	collagen type VI alpha 1 chain [Source:NCBI gene;Acc:396000]	7
ENSGALG00000013060	3.27794	-1.31325	-4.17781	0.00189068	0.179141	ADCY2	adenylate cyclase 2 [Source:NCBI gene;Acc:420935]	2
ENSGALG00000003923	8.57475	-1.07451	-4.15727	0.00195351	0.180172	COL6A3	collagen type VI alpha 3 chain [Source:NCBI gene;Acc:396548]	7
ENSGALG00000005551	5.52883	-1.2619	-4.14626	0.0019881	0.180172	DKK3	dickkopf WNT signaling pathway inhibitor 3 [Source:NCBI gene;Acc:396023]	5
ENSGALG00000009626	9.04151	-1.75106	-4.14132	0.00200385	0.180172	THBS1	thrombospondin 1 [Source:NCBI gene;Acc:373987]	5
ENSGALG00000025792	1.70092	-0.808529	-4.1452	0.00199146	0.180172	FRRS1L	ferric chelate reductase 1 like [Source:NCBI gene;Acc:420961]	2
ENSGALG00000026661	4.5269	-0.753496	-4.14219	0.00200104	0.180172	MSRB3	methionine sulfoxide reductase B3 [Source:NCBI gene;Acc:417833]	1
ENSGALG00000048151	2.96731	-0.780968	-4.14398	0.00199536	0.180172			Z
ENSGALG00000054678	-0.348086	-1.46962	-4.14411	0.00199494	0.180172			10
ENSGALG00000047571	-0.293602	-1.42839	-4.12651	0.00205179	0.183262			5
ENSGALG00000043044	4.1145	-0.62024	-4.11849	0.00207825	0.184404	IL1R1	interleukin 1 receptor type 1 [Source:NCBI gene;Acc:396481]	1
ENSGALG00000001758	4.0863	-0.70108	-4.11295	0.00209673	0.184828	QSOX2	quiescin sulfhydryl oxidase 2 [Source:NCBI gene;Acc:417129]	17
ENSGALG00000002771	6.10785	-1.11066	-4.09836	0.00214628	0.185557	CRIP1	cysteine rich protein 1 [Source:NCBI gene;Acc:101747696]	8
ENSGALG00000030313	5.03251	0.605429	4.10554	0.00212173	0.185557	RAD51	RAD51 recombinase [Source:NCBI gene;Acc:396086]	5
ENSGALG00000031129	3.24304	-1.16668	-4.10199	0.00213382	0.185557	HMCN1	hemicentin 1 [Source:NCBI gene;Acc:429823]	8
ENSGALG00000016322	2.99912	-1.26616	-4.07973	0.0022113	0.186545		glutathione transferase [Source:NCBI gene;Acc:396380]	3
ENSGALG00000026902	0.921625	-1.03456	-4.07797	0.00221754	0.186545	P2RX6	purinergic receptor P2X 6 [Source:NCBI gene;Acc:429367]	15
ENSGALG00000030237	2.21705	-1.66278	-4.07693	0.00222125	0.186545	PITX1	paired like homeodomain 1 [Source:NCBI gene;Acc:374201]	13
ENSGALG00000033497	3.14939	-0.704454	-4.07536	0.00222686	0.186545	FOXP4	forkhead box protein P4-like [Source:NCBI gene;Acc:100858652]	26
ENSGALG00000048256	1.31917	-1.35484	-4.0865	0.00218744	0.186545			15
ENSGALG00000053279	1.30999	-0.997655	-4.0621	0.00227474	0.189379			3
ENSGALG00000016575	2.77183	-0.821964	-4.0504	0.00231791	0.191384	GPM6B	glycoprotein M6B [Source:NCBI gene;Acc:418632]	1
ENSGALG00000036286	2.63157	-1.19034	-4.04791	0.00232721	0.191384		HHIP like 1 [Source:NCBI gene;Acc:423448]	5
ENSGALG00000048178	3.9278	-0.694777	-4.04016	0.00235638	0.192609	SLC27A3	long-chain fatty acid transport protein 3-like [Source:NCBI gene;Acc:107049496]	25
ENSGALG00000048332	-0.353051	-1.42497	-4.03098	0.00239147	0.1943	GPR135	G protein-coupled receptor 135 [Source:HGNC Symbol;Acc:HGNC:19991]	5
ENSGALG00000001857	0.961716	-2.30464	-4.02522	0.00241377	0.194937	C1QTNF12	family with sequence similarity 132 member A [Source:NCBI gene;Acc:419422]	21
ENSGALG00000007526	4.88506	-1.15801	-4.01175	0.00246672	0.195893		putative glutamine amidotransferase like class 1 domain containing 3A-like 2 [Source:NCBI gene;Acc:422305]	4
ENSGALG00000009847	3.95502	-0.780421	-4.01136	0.00246827	0.195893	STXBP6	syntaxin binding protein 6 [Source:NCBI gene;Acc:423299]	5
ENSGALG00000023435	-0.918202	1.2661	4.01113	0.00246918	0.195893	GATM	glycine amidinotransferase [Source:NCBI gene;Acc:395504]	10
ENSGALG00000009064	5.53002	-0.523814	-4.00287	0.0025023	0.197271	FZD1	frizzled class receptor 1 [Source:NCBI gene;Acc:374062]	2
ENSGALG00000036142	7.29855	-1.67106	-3.99954	0.00251581	0.197271	LOXL3	lysyl oxidase like 3 [Source:NCBI gene;Acc:425986]	4
ENSGALG00000006855	4.80479	-1.98242	-3.99356	0.00254021	0.197424	MELTF	melanotransferrin [Source:NCBI gene;Acc:396127]	9
ENSGALG00000015410	0.827346	-1.37138	-3.98835	0.00256167	0.197424	BVES	blood vessel epicardial substance [Source:NCBI gene;Acc:408032]	3
ENSGALG00000040993	8.85049	0.492121	3.99166	0.00254802	0.197424	BAMBI	BMP and activin membrane bound inhibitor [Source:NCBI gene;Acc:428413]	2
ENSGALG00000018557	3.31085	-1.41986	-3.98087	0.00259281	0.197566	SOD3	superoxide dismutase 3	extracellular [Source:NCBI gene;Acc:422810]	4
ENSGALG00000045246	7.44079	-0.803248	-3.98293	0.00258418	0.197566	GOLIM4	golgi integral membrane protein 4 [Source:NCBI gene;Acc:107049011]	9
ENSGALG00000001177	4.61699	-0.631287	-3.96185	0.00267382	0.200546	CD34	CD34 molecule [Source:NCBI gene;Acc:419856]	26
ENSGALG00000009568	1.97206	-1.5439	-3.96123	0.00267652	0.200546	SPOCK3	SPARC/osteonectin	cwcv and kazal like domains proteoglycan 3 [Source:NCBI gene;Acc:422425]	4
ENSGALG00000030025	5.55575	1.86285	3.96217	0.00267243	0.200546	FABP4	fatty acid binding protein 4 [Source:NCBI gene;Acc:374165]	2
ENSGALG00000002103	3.29739	-2.14329	-3.95714	0.00269427	0.200761	TPPP3	tubulin polymerization promoting protein family member 3 [Source:NCBI gene;Acc:415669]	11
ENSGALG00000010857	1.87584	-0.931278	-3.95217	0.00271608	0.201274	DAB1	DAB1	reelin adaptor protein [Source:NCBI gene;Acc:374083]	8
ENSGALG00000002678	7.72808	-0.779264	-3.94619	0.00274249	0.20212		chondroitin sulfate proteoglycan 4 [Source:NCBI gene;Acc:425524]	10
ENSGALG00000030647	3.73963	-1.32593	-3.92784	0.00282533	0.207094	MFAP2	microfibril associated protein 2 [Source:HGNC Symbol;Acc:HGNC:7033]	21
ENSGALG00000009667	-0.759708	-1.73079	-3.91721	0.00287452	0.208434	MFAP3L	microfibrillar associated protein 3 like [Source:NCBI gene;Acc:428729]	4
ENSGALG00000026736	3.84882	-1.73601	-3.91794	0.00287113	0.208434	OGN	osteoglycin [Source:NCBI gene;Acc:374039]	12
ENSGALG00000035923	3.45344	-0.577102	-3.8912	0.0029987	0.216275	MTMR11	myotubularin related protein 11 [Source:NCBI gene;Acc:100857251]	25
ENSGALG00000012374	5.40134	-0.462862	-3.88242	0.00304191	0.218224	FRMD6	FERM domain containing 6 [Source:NCBI gene;Acc:428930]	5
ENSGALG00000032031	6.5914	-0.468527	-3.8746	0.00308089	0.219852	MMP16	matrix metallopeptidase 16 [Source:NCBI gene;Acc:396116]	2
ENSGALG00000012190	-0.732341	-1.79324	-3.86407	0.00313423	0.222481	TMEM163	transmembrane protein 163 [Source:NCBI gene;Acc:424287]	7
ENSGALG00000041969	6.11177	-0.453318	-3.85778	0.00316654	0.22279	MTSS1	MTSS1	I-BAR domain containing [Source:NCBI gene;Acc:420336]	2
ENSGALG00000042784	0.898682	-1.16778	-3.8568	0.00317162	0.22279	TPPP	tubulin polymerization promoting protein [Source:NCBI gene;Acc:420800]	2
ENSGALG00000015712	4.37976	1.06643	3.81856	0.00337611	0.235926	SLBP	stem-loop binding protein [Source:NCBI gene;Acc:422902]	4
ENSGALG00000002963	5.03579	-0.926226	-3.80827	0.00343347	0.237473	PID1	phosphotyrosine interaction domain containing 1 [Source:NCBI gene;Acc:424787]	9
ENSGALG00000043860	1.40871	1.36163	3.8097	0.00342546	0.237473	PGR2/3	tandem PRG2/PRG3 gene pair [Source:NCBI gene;Acc:423134]	5
ENSGALG00000031495	6.31562	-0.597618	-3.80444	0.0034551	0.23775	TRIO	trio Rho guanine nucleotide exchange factor [Source:NCBI gene;Acc:420919]	2
ENSGALG00000004689	3.50149	-0.710211	-3.7954	0.00350667	0.238861	PKN1	protein kinase N3 [Source:NCBI gene;Acc:417209]	17
ENSGALG00000032768	4.07677	-0.953584	-3.79687	0.00349824	0.238861	SOX5	SRY-box 5 [Source:NCBI gene;Acc:418195]	1
ENSGALG00000005299	4.27036	-0.670574	-3.78881	0.00354476	0.240242	ANXA7	annexin A7 [Source:NCBI gene;Acc:423747]	6
ENSGALG00000001153	3.22616	-0.842674	-3.76812	0.00366716	0.245026	AUTS2	AUTS2	activator of transcription and developmental regulator [Source:NCBI gene;Acc:417481]	19
ENSGALG00000008739	5.04049	0.579706	3.76805	0.00366758	0.245026	MINDY3	family with sequence similarity 188 member A [Source:NCBI gene;Acc:420526]	2
ENSGALG00000009562	0.737701	-1.57302	-3.7587	0.00372435	0.245026	PLEK2	pleckstrin 2 [Source:NCBI gene;Acc:423278]	5
ENSGALG00000020316	4.35742	-0.584607	-3.76576	0.00368139	0.245026	IL13RA2	interleukin 13 receptor subunit alpha 2 [Source:NCBI gene;Acc:422219]	4
ENSGALG00000028015	2.45236	-0.798638	-3.75932	0.00372055	0.245026	HES1	hes family bHLH transcription factor 1 [Source:NCBI gene;Acc:769039]	9
ENSGALG00000041808	4.54895	-0.756842	-3.76271	0.00369993	0.245026	ANO1	anoctamin 1 [Source:NCBI gene;Acc:423144]	5
ENSGALG00000032656	2.5746	-0.834699	-3.75446	0.00375043	0.245544	TCF7L1	transcription factor 7 like 1 [Source:NCBI gene;Acc:395230]	22
ENSGALG00000007426	1.48658	-0.921182	-3.74805	0.00379014	0.246945	MKX	mohawk homeobox [Source:NCBI gene;Acc:771284]	2
ENSGALG00000015015	7.44394	-1.88589	-3.73472	0.00387418	0.251207	CYTL1	cytokine like 1 [Source:NCBI gene;Acc:422849]	4
ENSGALG00000007780	4.73115	0.694797	3.72553	0.0039333	0.253447	EIF4E3	eukaryotic translation initiation factor 4E family member 3 [Source:NCBI gene;Acc:416093]	12
ENSGALG00000008077	1.75362	-1.06284	-3.72064	0.0039651	0.253447		progestin and adipoQ receptor family member 5 [Source:NCBI gene;Acc:427516]	10
ENSGALG00000029022	0.529133	-1.16331	-3.72194	0.0039566	0.253447	NPAS3	neuronal PAS domain protein 3 [Source:NCBI gene;Acc:423315]	5
ENSGALG00000009222	6.72661	-0.774751	-3.71361	0.00401129	0.253933	FNDC3B	fibronectin type III domain containing 3B [Source:NCBI gene;Acc:424984]	9
ENSGALG00000010078	2.07715	-0.712331	-3.70809	0.00404801	0.253933	GLP1R	glucagon like peptide 1 receptor [Source:NCBI gene;Acc:428573]	3
ENSGALG00000012216	-0.697674	-1.60922	-3.71067	0.0040308	0.253933	BMPR1B	bone morphogenetic protein receptor type 1B [Source:NCBI gene;Acc:396030]	4
ENSGALG00000031987	4.79257	-0.690254	-3.71308	0.00401482	0.253933	MYO5A	myosin VA [Source:NCBI gene;Acc:396237]	10
ENSGALG00000023303	0.455875	-1.84267	-3.70138	0.00409302	0.254515	SIX2	SIX homeobox 2 [Source:NCBI gene;Acc:724086]	3
ENSGALG00000035362	2.96165	-0.561951	-3.70108	0.00409504	0.254515			21
ENSGALG00000005285	2.69972	-0.907408	-3.69726	0.00412099	0.254953	TBX4	T-box 4 [Source:NCBI gene;Acc:373989]	19
ENSGALG00000052396	2.88412	-1.0093	-3.69133	0.00416152	0.256285			5
ENSGALG00000014903	4.75667	-0.726436	-3.68258	0.00422208	0.256501	ITGA2	integrin subunit alpha 2 [Source:NCBI gene;Acc:100857227]	Z
ENSGALG00000016441	1.94729	-1.1685	-3.68491	0.00420584	0.256501			3
ENSGALG00000032713	0.364956	-1.23091	-3.68413	0.00421129	0.256501	FOXA1	forkhead box A1 [Source:NCBI gene;Acc:101752179]	5
ENSGALG00000012420	6.16187	-0.993834	-3.67009	0.00431015	0.259513	CG-1B	galectin 1 [Source:NCBI gene;Acc:396491]	1
ENSGALG00000046204	4.1875	-1.39329	-3.67276	0.00429116	0.259513	R3HDML	R3H domain containing like [Source:NCBI gene;Acc:100858089]	20
ENSGALG00000004386	6.07573	-1.30321	-3.65679	0.00440606	0.260634	SOX9	SRY (sex determining region Y)-box 9 [Source:NCBI gene;Acc:374148]	18
ENSGALG00000030140	1.2649	-1.36872	-3.66011	0.00438191	0.260634	CCDC3	coiled-coil domain containing 3 [Source:NCBI gene;Acc:769832]	1
ENSGALG00000036498	5.44906	-0.847009	-3.65795	0.00439758	0.260634	EHD2	EH domain-containing protein 2-like [Source:NCBI gene;Acc:107049991]	32
ENSGALG00000049638	2.8839	-1.10877	-3.66001	0.00438259	0.260634	GATD1	glutamine amidotransferase like class 1 domain containing 1 [Source:HGNC Symbol;Acc:HGNC:26616]	5
ENSGALG00000006424	4.40664	-0.536625	-3.64381	0.00450174	0.260699	JADE2	jade family PHD finger 2 [Source:NCBI gene;Acc:416315]	13
ENSGALG00000007447	6.95755	1.52085	3.64729	0.00447589	0.260699	TUBB1	tubulin beta 1 class VI [Source:NCBI gene;Acc:396427]	20
ENSGALG00000034078	1.88374	-1.17412	-3.64395	0.0045007	0.260699	GLT8D2	glycosyltransferase 8 domain containing 2 [Source:NCBI gene;Acc:418085]	1
ENSGALG00000051461	-0.0467962	-1.33757	-3.65155	0.00444441	0.260699			KZ626833.1
ENSGALG00000053187	4.28248	-0.703583	-3.64353	0.00450381	0.260699		soluble scavenger receptor cysteine-rich domain-containing protein SSC5D-like [Source:NCBI gene;Acc:101747860]	31
ENSGALG00000005969	5.4029	-0.54578	-3.62265	0.00466243	0.262739	ANTXRL	anthrax toxin receptor-like [Source:NCBI gene;Acc:423775]	6
ENSGALG00000012392	4.78638	0.849451	3.63538	0.00456509	0.262739	IYD	iodotyrosine deiodinase [Source:NCBI gene;Acc:421631]	3
ENSGALG00000013102	3.68826	-0.972166	-3.6296	0.00460902	0.262739	COBL	cordon-bleu WH2 repeat protein [Source:NCBI gene;Acc:420949]	2
ENSGALG00000017096	3.47879	-0.691712	-3.62552	0.00464034	0.262739	LNX2	uncharacterized LOC101749023 [Source:NCBI gene;Acc:101749023]	1
ENSGALG00000017308	0.781384	-2.22195	-3.62098	0.00467542	0.262739	CHRDL2	chordin like 2 [Source:NCBI gene;Acc:419054]	1
ENSGALG00000046455	1.09576	1.06576	3.6284	0.0046182	0.262739			26
ENSGALG00000050751	-1.55805	2.39104	3.62728	0.00462675	0.262739			5
ENSGALG00000002637	4.44908	1.5382	3.59685	0.00486652	0.271218	RBP7	retinol binding protein 7 [Source:NCBI gene;Acc:419447]	21
ENSGALG00000016592	2.74953	1.41229	3.59911	0.00484827	0.271218	PRPS2	phosphoribosyl pyrophosphate synthetase 2 [Source:NCBI gene;Acc:418639]	1
ENSGALG00000007963	3.2305	-0.824992	-3.59184	0.00490716	0.272357	NFATC2	nuclear factor of activated T-cells 2 [Source:NCBI gene;Acc:419346]	20
ENSGALG00000032544	6.17888	0.51301	3.58699	0.00494688	0.273437	ALDH5A1	aldehyde dehydrogenase 5 family member A1 [Source:NCBI gene;Acc:420818]	2
ENSGALG00000005903	-3.71893e-06	-1.13707	-3.57493	0.00504712	0.274769	NRIP3	nuclear receptor interacting protein 2 [Source:NCBI gene;Acc:423050]	5
ENSGALG00000007569	5.78232	0.558837	3.57124	0.00507818	0.274769	KBTBD8	kelch repeat and BTB domain containing 8 [Source:NCBI gene;Acc:416085]	12
ENSGALG00000015058	0.627797	-1.54565	-3.5692	0.0050955	0.274769	PTPRD	protein tyrosine phosphatase	receptor type D [Source:NCBI gene;Acc:431602]	Z
ENSGALG00000015167	2.24746	-1.07401	-3.57925	0.00501099	0.274769	PRUNE2	prune homolog 2 [Source:NCBI gene;Acc:768768]	Z
ENSGALG00000033304	3.69002	-0.856534	-3.56857	0.00510082	0.274769	MYBL1	MYB proto-oncogene like 1 [Source:NCBI gene;Acc:396158]	2
ENSGALG00000039826	0.0737185	-2.47435	-3.56707	0.0051136	0.274769	CNGA3	cyclic nucleotide gated channel alpha 3 [Source:NCBI gene;Acc:396144]	1
ENSGALG00000040954	2.05841	-1.0181	-3.57699	0.00502983	0.274769	GPR37	G protein-coupled receptor 37 [Source:NCBI gene;Acc:417748]	1
ENSGALG00000021345	4.90406	-0.640002	-3.56049	0.00516995	0.276695	B3GNT9	UDP-GlcNAc:betaGal beta-1	3-N-acetylglucosaminyltransferase 9 [Source:HGNC Symbol;Acc:HGNC:28714]	11
ENSGALG00000029652	5.68913	-0.634198	-3.55703	0.00519979	0.277192	OPHN1	oligophrenin 1 [Source:NCBI gene;Acc:422162]	4
ENSGALG00000037026	2.27544	0.87718	3.54871	0.00527237	0.279954			25
ENSGALG00000003578	11.6808	-1.22796	-3.53671	0.00537895	0.282244	FN1	fibronectin 1 [Source:NCBI gene;Acc:396133]	7
ENSGALG00000008698	3.86297	0.514848	3.53445	0.0053992	0.282244	MGME1	mitochondrial genome maintenance exonuclease 1 [Source:NCBI gene;Acc:416719]	3
ENSGALG00000017863	-0.388723	1.03196	3.53731	0.0053735	0.282244			5
ENSGALG00000050931	0.977207	-1.30302	-3.53911	0.00535747	0.282244		NAC alpha domain containing [Source:NCBI gene;Acc:420409]	2
ENSGALG00000035266	0.308594	-1.19274	-3.52987	0.0054406	0.28331	ANOS1	anosmin 1 [Source:NCBI gene;Acc:396395]	1
ENSGALG00000054220	0.405518	1.05461	3.52606	0.00547534	0.284023			4
ENSGALG00000009360	6.5022	-0.983204	-3.51979	0.00553296	0.285466	CAPN2	calpain 2 [Source:NCBI gene;Acc:395963]	3
ENSGALG00000035099	2.11773	-1.22255	-3.51843	0.00554549	0.285466	LRRN1	leucine rich repeat neuronal 1 [Source:NCBI gene;Acc:771599]	12
ENSGALG00000040444	1.35504	-1.25746	-3.51287	0.00559725	0.287035	SEMA3C	semaphorin 3C [Source:NCBI gene;Acc:374090]	1
ENSGALG00000005448	4.48549	0.892872	3.49004	0.00581501	0.29155	MYL3	myosin	light chain 3	alkali; ventricular	skeletal	slow [Source:NCBI gene;Acc:396067]	2
ENSGALG00000008735	-0.631845	1.32073	3.49197	0.00579622	0.29155	BFSP1	beaded filament structural protein 1 [Source:NCBI gene;Acc:396056]	3
ENSGALG00000010158	6.21219	-0.409534	-3.49518	0.00576517	0.29155	KANK1	KN motif and ankyrin repeat domains 1 [Source:NCBI gene;Acc:395475]	Z
ENSGALG00000010258	5.51428	-1.0791	-3.49166	0.0057992	0.29155	LTBP2	latent transforming growth factor beta binding protein 2 [Source:NCBI gene;Acc:428888]	5
ENSGALG00000030712	14.5491	-1.7317	-3.49302	0.00578604	0.29155	COL2A1	collagen type II alpha 1 chain [Source:NCBI gene;Acc:395069]	33
ENSGALG00000043405	8.58123	0.46987	3.49671	0.00575045	0.29155	BNIP3L	BCL2 interacting protein 3 like [Source:NCBI gene;Acc:419522]	22
ENSGALG00000030780	4.84238	-0.71018	-3.4836	0.00587798	0.293616	MGAT4A	mannosyl (alpha-1	3-)-glycoprotein beta-1	4-N-acetylglucosaminyltransferase	isozyme A [Source:NCBI gene;Acc:418692]	1
ENSGALG00000033198	3.73011	-1.12733	-3.47472	0.00596595	0.296911	MYO5C	myosin VC [Source:NCBI gene;Acc:430027]	10
ENSGALG00000003805	4.26893	-0.916023	-3.45939	0.00612106	0.297201		protein kinase	cGMP-dependent	type I [Source:NCBI gene;Acc:423682]	6
ENSGALG00000012712	4.20029	0.640519	3.46893	0.00602405	0.297201	RBM24	RNA binding motif protein 24 [Source:NCBI gene;Acc:420846]	2
ENSGALG00000013627	1.01436	-1.10905	-3.4698	0.00601534	0.297201	SLC7A2	solute carrier family 7 member 2 [Source:NCBI gene;Acc:422730]	4
ENSGALG00000015025	2.93459	-0.539655	-3.46285	0.0060857	0.297201	VANGL1	VANGL planar cell polarity protein 1 [Source:NCBI gene;Acc:418337]	1
ENSGALG00000036956	8.40841	0.542719	3.46447	0.0060692	0.297201			MT
ENSGALG00000038601	0.906636	-0.838336	-3.45891	0.00612604	0.297201	LIPH	lipase H [Source:HGNC Symbol;Acc:HGNC:18483]	9
ENSGALG00000047320	4.95744	-1.14287	-3.4595	0.00612003	0.297201	MFAP5	microfibrillar associated protein 5 [Source:NCBI gene;Acc:418256]	1
ENSGALG00000000516	3.18626	-0.596628	-3.44022	0.00632103	0.297906	FANCA	Fanconi anemia complementation group A [Source:NCBI gene;Acc:415854]	11
ENSGALG00000005721	1.64662	-0.818816	-3.43894	0.00633463	0.297906	DGKG	diacylglycerol kinase gamma [Source:NCBI gene;Acc:424839]	9
ENSGALG00000008691	4.9797	0.695497	3.44832	0.00623577	0.297906	SNX5	sorting nexin 5 [Source:NCBI gene;Acc:416718]	3
ENSGALG00000009173	0.0471681	-1.71806	-3.44115	0.0063112	0.297906	GFRA1	GDNF family receptor alpha 1 [Source:NCBI gene;Acc:395994]	6
ENSGALG00000009507	-0.826082	-1.57006	-3.43842	0.00634014	0.297906	PLEKHH1	pleckstrin homology	MyTH4 and FERM domain containing H1 [Source:NCBI gene;Acc:423270]	5
ENSGALG00000012089	-0.723548	-1.50359	-3.4367	0.00635843	0.297906			5
ENSGALG00000031700	5.08622	-0.609328	-3.43395	0.00638782	0.297906	TRPS1	transcriptional repressor GATA binding 1 [Source:NCBI gene;Acc:420289]	2
ENSGALG00000042511	4.05104	-1.00141	-3.43229	0.00640562	0.297906	PKDCC	protein kinase domain containing	cytoplasmic a [Source:NCBI gene;Acc:421390]	3
ENSGALG00000043047	3.84036	-0.898036	-3.44231	0.00629886	0.297906	SOBP	sine oculis binding protein homolog [Source:NCBI gene;Acc:421775]	3
ENSGALG00000049024	3.84524	0.776861	3.45025	0.00621559	0.297906	CD7	CD7 molecule [Source:NCBI gene;Acc:417346]	18
ENSGALG00000049177	0.586987	-0.876957	-3.43522	0.00637427	0.297906			8
ENSGALG00000050112	2.78123	-1.03675	-3.43426	0.00638452	0.297906			5
ENSGALG00000001038	5.87122	-0.410848	-3.43023	0.00642781	0.29791	MAN1C1	mannosidase	alpha	class 1C	member 1 [Source:NCBI gene;Acc:419588]	23
ENSGALG00000012109	7.78859	0.472273	3.42423	0.00649291	0.298206	EIF3M	eukaryotic translation initiation factor 3 subunit M [Source:NCBI gene;Acc:421602]	5
ENSGALG00000013143	2.69134	-0.690775	-3.42353	0.00650051	0.298206	PDE3A	phosphodiesterase 3A [Source:NCBI gene;Acc:418185]	1
ENSGALG00000034673	7.51606	-0.803197	-3.42472	0.00648759	0.298206	HTRA3	HtrA serine peptidase 3 [Source:NCBI gene;Acc:422868]	4
ENSGALG00000005521	5.50589	-0.391266	-3.4163	0.00657996	0.299234	PER2	period circadian clock 2 [Source:NCBI gene;Acc:374116]	9
ENSGALG00000029429	9.30644	-0.618131	-3.41544	0.00658949	0.299234	TGFBI	transforming growth factor beta induced [Source:NCBI gene;Acc:395897]	13
ENSGALG00000031978	4.68205	0.867903	3.41582	0.00658521	0.299234	TARP	TCR gamma alternate reading frame protein [Source:NCBI gene;Acc:776306]	2
ENSGALG00000054736	0.624883	-1.24891	-3.4069	0.00668473	0.30254			3
ENSGALG00000011962	5.85533	-0.730328	-3.40014	0.00676103	0.30497	NDNF	neuron-derived neurotrophic factor [Source:NCBI gene;Acc:422672]	4
ENSGALG00000002899	5.46359	-0.581588	-3.39049	0.00687164	0.308541	AACS	acetoacetyl-CoA synthetase [Source:NCBI gene;Acc:416811]	15
ENSGALG00000008901	3.60478	-1.22473	-3.38926	0.00688596	0.308541	PTGFR	prostaglandin F receptor [Source:NCBI gene;Acc:424548]	8
ENSGALG00000000573	3.6668	-0.66568	-3.37338	0.00707237	0.311016	PER3	period circadian clock 3 [Source:NCBI gene;Acc:419366]	21
ENSGALG00000002205	4.62525	-0.594968	-3.3682	0.00713438	0.311016	FBRSL1	fibrosin-like 1 [Source:NCBI gene;Acc:416793]	15
ENSGALG00000004812	4.44605	-0.596883	-3.38238	0.00696607	0.311016	FAM129A	family with sequence similarity 129 member A [Source:NCBI gene;Acc:424451]	8
ENSGALG00000005884	4.88362	-0.633803	-3.37064	0.00710503	0.311016		mitogen-activated protein kinase kinase kinase 3-like [Source:NCBI gene;Acc:420419]	2
ENSGALG00000007748	2.55392	-0.709877	-3.37795	0.00701815	0.311016	SLC16A2	solute carrier family 16 member 2 [Source:NCBI gene;Acc:428716]	4
ENSGALG00000035935	2.84317	-0.828903	-3.37111	0.00709948	0.311016		unc-13 homolog C [Source:NCBI gene;Acc:415413]	10
ENSGALG00000040279	5.96066	1.02351	3.37785	0.00701941	0.311016	RHCE	Rh blood group CcEe antigens [Source:NCBI gene;Acc:395121]	23
ENSGALG00000044675	6.28987	-1.48627	-3.367	0.00714874	0.311016	MATN2	matrilin 2 [Source:NCBI gene;Acc:426584]	2
ENSGALG00000048179	1.3577	-1.32593	-3.3682	0.00713439	0.311016			4
ENSGALG00000038043	3.3671	-0.547655	-3.36284	0.00719908	0.312199	HECTD2	HECT domain E3 ubiquitin protein ligase 2 [Source:NCBI gene;Acc:427031]	6
ENSGALG00000052831	-0.0254958	1.48048	3.35557	0.00728778	0.315033			3
ENSGALG00000009424	2.3827	-0.840524	-3.3512	0.00734164	0.315406	FOXP2	forkhead box P2 [Source:NCBI gene;Acc:769935]	1
ENSGALG00000016289	5.60449	-0.676413	-3.34887	0.00737054	0.315406	DST	dystonin [Source:NCBI gene;Acc:421884]	3
ENSGALG00000029390	4.23682	0.465682	3.34852	0.00737489	0.315406	C15H12ORF65	chromosome 15 open reading frame	human C12orf65 [Source:NCBI gene;Acc:416827]	15
ENSGALG00000039037	6.29516	-0.536554	-3.34731	0.00738996	0.315406	PICALM	phosphatidylinositol binding clathrin assembly protein [Source:NCBI gene;Acc:425991]	1
ENSGALG00000007886	3.46277	-1.23786	-3.34375	0.00743436	0.3163			5
ENSGALG00000001483	6.28238	-0.734009	-3.34079	0.00747158	0.316884		Golgi integral membrane protein 4-like [Source:NCBI gene;Acc:419409]	21
ENSGALG00000001450	-0.430867	-1.33602	-3.32456	0.00767903	0.322856	IGSF9B	immunoglobulin superfamily member 9B [Source:NCBI gene;Acc:428237]	24
ENSGALG00000007240	2.66232	-0.636736	-3.32416	0.0076842	0.322856	TRAIL-LIKE	TNF-related apoptosis inducing ligand-like [Source:NCBI gene;Acc:395283]	4
ENSGALG00000050508	3.79583	-0.511874	-3.32575	0.0076636	0.322856	NOS3	nitric oxide synthase	endothelial-like [Source:NCBI gene;Acc:107057170]	2
ENSGALG00000042227	6.73126	0.600381	3.32123	0.00772228	0.323449	GNLY	granulysin [Source:NCBI gene;Acc:693257]	22
ENSGALG00000006796	4.5957	-0.448339	-3.30788	0.00789835	0.326647	SRPX2	sushi repeat containing protein	X-linked 2 [Source:NCBI gene;Acc:422261]	4
ENSGALG00000007530	2.22662	-0.663546	-3.30665	0.00791471	0.326647			4
ENSGALG00000014262	3.48576	-0.666085	-3.30937	0.00787842	0.326647			4
ENSGALG00000021230	5.7108	1.13074	3.30447	0.00794396	0.326647	EPB42	erythrocyte membrane protein band 4.2 [Source:NCBI gene;Acc:419216]	20
ENSGALG00000038207	2.84243	-0.57078	-3.31243	0.00783787	0.326647			22
ENSGALG00000039032	1.5253	-1.50699	-3.30572	0.00792722	0.326647	FJX1	four jointed box 1 [Source:NCBI gene;Acc:100858635]	5
ENSGALG00000037545	1.57062	-1.12146	-3.30073	0.00799434	0.327719	GRIP2	glutamate receptor interacting protein 2 [Source:NCBI gene;Acc:416043]	12
ENSGALG00000009020	5.15385	-0.526127	-3.29571	0.00806243	0.328538	JAG1	jagged 1 [Source:NCBI gene;Acc:396043]	3
ENSGALG00000011798	6.34974	0.645604	3.29475	0.0080755	0.328538	HEBP1	heme binding protein 1 [Source:NCBI gene;Acc:417961]	1
ENSGALG00000016655	2.72343	-0.770031	-3.29388	0.0080874	0.328538	GYG2	glycogenin 2 [Source:NCBI gene;Acc:418660]	1
ENSGALG00000010412	4.42991	-0.570319	-3.29015	0.00813849	0.328634	WWTR1	WW domain containing transcription regulator 1 [Source:NCBI gene;Acc:100859902]	9
ENSGALG00000050299	0.781423	-1.13172	-3.29132	0.00812247	0.328634			6
ENSGALG00000036593	5.10176	-0.630207	-3.28607	0.00819488	0.329923	FOXC2	forkhead box C2 [Source:NCBI gene;Acc:396039]	11
ENSGALG00000005643	2.97173	-0.490793	-3.27653	0.00832817	0.332314	LYVE1	lymphatic vessel endothelial hyaluronan receptor 1 [Source:NCBI gene;Acc:423038]	5
ENSGALG00000005797	1.6469	-1.01992	-3.27738	0.00831628	0.332314	COL20A1	collagen type XX alpha 1 chain [Source:NCBI gene;Acc:419243]	20
ENSGALG00000031440	3.32633	-1.00961	-3.27831	0.00830309	0.332314	PTPRU	protein tyrosine phosphatase	receptor type U [Source:NCBI gene;Acc:395153]	23
ENSGALG00000054317	0.489456	-1.42351	-3.27177	0.00839545	0.33401			1
ENSGALG00000031762	2.10916	-0.688334	-3.26523	0.00848894	0.334767	TMEM98	transmembrane protein 98 [Source:NCBI gene;Acc:101747287]	27
ENSGALG00000033295	3.80451	-0.59952	-3.26574	0.00848156	0.334767	CAV2	caveolin 2 [Source:NCBI gene;Acc:417772]	1
ENSGALG00000039553	4.06803	-0.651039	-3.266	0.00847793	0.334767	SULF1	sulfatase 1 [Source:NCBI gene;Acc:426312]	2
ENSGALG00000007980	2.12955	-0.79115	-3.25789	0.00859504	0.337963	KCNG1	potassium voltage-gated channel modifier subfamily G member 1 [Source:NCBI gene;Acc:419347]	20
ENSGALG00000003904	1.51815	-0.997526	-3.24961	0.00871641	0.338785	MLPH	melanophilin [Source:NCBI gene;Acc:424019]	7
ENSGALG00000011423	4.72193	0.396396	3.25059	0.00870199	0.338785	CEP43	FGFR1 oncogene partner [Source:NCBI gene;Acc:421568]	3
ENSGALG00000028602	-0.320429	1.40292	3.25407	0.00865082	0.338785	HMP19	HMP19 protein [Source:NCBI gene;Acc:416212]	13
ENSGALG00000048906	4.31972	-0.426335	-3.25114	0.00869392	0.338785			5
ENSGALG00000001998	5.88786	1.01664	3.23669	0.00890937	0.344247	R3HDM4	R3H domain containing 4 [Source:NCBI gene;Acc:770563]	28
ENSGALG00000014887	5.3351	0.44185	3.23743	0.00889816	0.344247	ASF1A	anti-silencing function 1A histone chaperone [Source:NCBI gene;Acc:723780]	3
ENSGALG00000019768	4.96569	-0.540291	-3.23341	0.00895906	0.344247	ACSF2	acyl-CoA synthetase family member 2 [Source:NCBI gene;Acc:422102]	18
ENSGALG00000034591	6.77578	0.575407	3.23384	0.00895255	0.344247		transmembrane protein 14C [Source:NCBI gene;Acc:420851]	2
ENSGALG00000015363	4.74853	0.64126	3.231	0.00899563	0.344671	HJURP	Holliday junction recognition protein [Source:NCBI gene;Acc:418413]	1
ENSGALG00000032206	3.2885	-0.527554	-3.22804	0.00904099	0.345427			6
ENSGALG00000006221	2.54379	-0.852735	-3.22123	0.00914602	0.347212	KIF1A	kinesin family member 1A [Source:NCBI gene;Acc:424849]	9
ENSGALG00000008367	5.96777	1.05631	3.22001	0.00916495	0.347212	MDK	midkine (neurite growth-promoting factor 2) [Source:NCBI gene;Acc:423196]	5
ENSGALG00000010995	4.25053	0.5072	3.22082	0.00915229	0.347212	ITGB3BP	integrin subunit beta 3 binding protein [Source:NCBI gene;Acc:424689]	8
ENSGALG00000003123	1.58649	-0.902551	-3.20208	0.00944806	0.348633	CNTNAP1	contactin associated protein 1 [Source:NCBI gene;Acc:428309]	27
ENSGALG00000003403	2.89697	-1.55117	-3.20134	0.00945993	0.348633	ZNF385C	zinc finger protein 385C [Source:NCBI gene;Acc:420031]	27
ENSGALG00000005599	0.0924043	0.984306	3.20574	0.00938949	0.348633		UDP glycosyltransferase 8-like [Source:NCBI gene;Acc:428949]	6
ENSGALG00000007304	4.43683	-0.573061	-3.20127	0.00946094	0.348633	DNMBP	dynamin binding protein [Source:NCBI gene;Acc:423827]	6
ENSGALG00000008437	6.47806	-0.599078	-3.20401	0.00941708	0.348633	NET1	neuroepithelial cell transforming 1 [Source:NCBI gene;Acc:416693]	1
ENSGALG00000009452	3.21083	-0.55328	-3.20199	0.00944946	0.348633	GALNT16	polypeptide N-acetylgalactosaminyltransferase 16 [Source:NCBI gene;Acc:423263]	5
ENSGALG00000016377	5.86892	-0.513939	-3.20732	0.00936431	0.348633	PXDN	peroxidasin [Source:NCBI gene;Acc:421914]	3
ENSGALG00000027247	2.34491	0.860882	3.20961	0.00932807	0.348633	EOMES	eomesodermin [Source:NCBI gene;Acc:428443]	2
ENSGALG00000048607	-0.910445	1.07439	3.20293	0.00943437	0.348633			3
ENSGALG00000050232	0.553119	0.967717	3.21123	0.00930243	0.348633			2
ENSGALG00000015235	3.10575	1.14315	3.19601	0.0095458	0.3489	XCL1	X-C motif chemokine ligand 1 [Source:NCBI gene;Acc:395914]	1
ENSGALG00000051209	1.38548	-0.80454	-3.1979	0.00951525	0.3489			1
ENSGALG00000052959	2.22564	1.14219	3.19733	0.00952454	0.3489			1
ENSGALG00000010875	3.42998	-0.605734	-3.1916	0.00961756	0.350573	ITGB8	integrin subunit beta 8 [Source:NCBI gene;Acc:395470]	2
ENSGALG00000042587	3.78404	0.582755	3.18896	0.00966079	0.3512		uncharacterized LOC100857928 [Source:NCBI gene;Acc:100857928]	13
ENSGALG00000009689	4.38743	1.06699	3.18187	0.00977781	0.351662	PON1	paraoxonase 1 [Source:NCBI gene;Acc:395830]	2
ENSGALG00000010386	2.35254	-0.841696	-3.18302	0.00975869	0.351662	DLK2	delta like non-canonical Notch ligand 2 [Source:NCBI gene;Acc:428576]	3
ENSGALG00000014674	4.64056	-0.499311	-3.18509	0.00972454	0.351662	CLSTN3	calsyntenin 3 [Source:NCBI gene;Acc:418297]	1
ENSGALG00000014699	2.06337	-1.07383	-3.18395	0.00974329	0.351662	MEGF10	multiple EGF like domains 10 [Source:NCBI gene;Acc:427126]	Z
ENSGALG00000003261	6.41505	-0.610669	-3.17747	0.00985117	0.353358	PTRF	polymerase I and transcript release factor [Source:NCBI gene;Acc:396006]	27
ENSGALG00000004038	5.36739	0.646999	3.16298	0.0100967	0.354622	ADAL	adenosine deaminase like [Source:NCBI gene;Acc:415391]	10
ENSGALG00000005347	5.65569	0.754377	3.17361	0.00991604	0.354622	ADAMTS18	ADAM metallopeptidase with thrombospondin type 1 motif 18 [Source:NCBI gene;Acc:100858277]	11
ENSGALG00000007650	4.89358	0.501955	3.16941	0.00998712	0.354622	SLC9A3R1	SLC9A3 regulator 1 [Source:NCBI gene;Acc:422108]	18
ENSGALG00000017091	5.57091	-0.553989	-3.16299	0.0100967	0.354622	FLT1	fms related tyrosine kinase 1 [Source:NCBI gene;Acc:374100]	1
ENSGALG00000026396	1.07351	1.26241	3.16656	0.0100355	0.354622	BG1	BG-like antigen 1 [Source:NCBI gene;Acc:426940]	16
ENSGALG00000029012	1.78309	-1.01723	-3.16401	0.0100791	0.354622		eva-1 homolog A	regulator of programmed cell death [Source:NCBI gene;Acc:422065]	3
ENSGALG00000045469	3.12719	-1.48448	-3.1669	0.0100297	0.354622	BCAN	brevican [Source:NCBI gene;Acc:425976]	25
ENSGALG00000048430	4.29948	0.694154	3.16846	0.0100031	0.354622		extensin-like [Source:NCBI gene;Acc:101748916]	KZ626839.1
ENSGALG00000002959	5.86601	0.442055	3.15851	0.0101738	0.356399	NRBF2	nuclear receptor binding factor 2 [Source:NCBI gene;Acc:423656]	6
ENSGALG00000036747	5.0802	0.628289	3.15359	0.0102593	0.358348		tetratricopeptide repeat domain 31 [Source:NCBI gene;Acc:100858003]	4
ENSGALG00000051201	-0.0435364	-1.17425	-3.15226	0.0102825	0.358348			3
ENSGALG00000000678	6.05908	0.720112	3.1482	0.0103537	0.359512	CITED4	Cbp/p300 interacting transactivator with Glu/Asp rich carboxy-terminal domain 4 [Source:NCBI gene;Acc:395465]	23
ENSGALG00000005714	4.55222	-1.07223	-3.14668	0.0103806	0.359512	PKD1	polycystin 1	transient receptor potential channel interacting [Source:NCBI gene;Acc:416553]	14
ENSGALG00000012006	0.739721	-1.46288	-3.14581	0.0103959	0.359512	RTN1	reticulon 1 [Source:NCBI gene;Acc:378791]	5
ENSGALG00000009300	5.37811	-0.415379	-3.13251	0.010634	0.363091	NUMB	NUMB	endocytic adaptor protein [Source:NCBI gene;Acc:395639]	5
ENSGALG00000014011	3.34333	0.718168	3.13373	0.0106119	0.363091	LRMP	lymphoid restricted membrane protein [Source:NCBI gene;Acc:418205]	1
ENSGALG00000021220	0.859068	-0.765696	-3.13703	0.0105525	0.363091	PPP1R3D	protein phosphatase 1 regulatory subunit 3D [Source:HGNC Symbol;Acc:HGNC:9294]	20
ENSGALG00000022871	3.66333	-1.82499	-3.1341	0.0106052	0.363091	HHLA2	HERV-H LTR-associating 2 [Source:NCBI gene;Acc:107054979]	1
ENSGALG00000052026	5.31177	1.03707	3.13258	0.0106326	0.363091		serine peptidase inhibitor	Kazal type 2 (acrosin-trypsin inhibitor) [Source:NCBI gene;Acc:770729]	4
ENSGALG00000011661	6.93441	0.369058	3.1286	0.0107049	0.364135	SOD2	superoxide dismutase 2	mitochondrial [Source:NCBI gene;Acc:374042]	3
ENSGALG00000037332	6.11701	-0.486096	-3.12785	0.0107186	0.364135	IGFBP7	insulin like growth factor binding protein 7 [Source:NCBI gene;Acc:422620]	4
ENSGALG00000001876	4.21639	-0.389091	-3.11721	0.0109146	0.364569	RASA4B	RAS p21 protein activator 4B [Source:NCBI gene;Acc:417513]	19
ENSGALG00000003987	3.70902	0.5929	3.11183	0.011015	0.364569	TRAF4	TNF receptor associated factor 4 [Source:NCBI gene;Acc:417577]	19
ENSGALG00000006751	6.1728	-0.49376	-3.11676	0.0109229	0.364569	THY1	Thy-1 cell surface antigen [Source:NCBI gene;Acc:378897]	24
ENSGALG00000011623	6.8251	-0.541507	-3.12059	0.0108519	0.364569	ADAMTS3	ADAM metallopeptidase with thrombospondin type 1 motif 3 [Source:NCBI gene;Acc:428760]	4
ENSGALG00000012412	5.1515	-0.630684	-3.1111	0.0110287	0.364569	MTHFD1L	methylenetetrahydrofolate dehydrogenase (NADP+ dependent) 1 like [Source:NCBI gene;Acc:421633]	3
ENSGALG00000014501	0.810028	-1.3989	-3.1131	0.0109912	0.364569	FGFBP2	fibroblast growth factor binding protein 2 [Source:NCBI gene;Acc:395094]	4
ENSGALG00000015240	5.99999	0.784615	3.12514	0.0107683	0.364569		coproporphyrinogen oxidase [Source:NCBI gene;Acc:418377]	1
ENSGALG00000027579	6.53136	0.498529	3.11868	0.0108873	0.364569	MRPS6	mitochondrial ribosomal protein S6 [Source:NCBI gene;Acc:427978]	1
ENSGALG00000033806	3.65892	-0.462184	-3.11886	0.010884	0.364569	ITPRIPL2	ITPRIP like 2 [Source:HGNC Symbol;Acc:HGNC:27257]	14
ENSGALG00000035836	8.81806	0.525196	3.11413	0.0109719	0.364569	LDHB	lactate dehydrogenase B [Source:NCBI gene;Acc:373997]	1
ENSGALG00000051055	0.353755	-1.29419	-3.11227	0.0110068	0.364569	MAPK8IP2	C-Jun-amino-terminal kinase-interacting protein 2-like [Source:NCBI gene;Acc:107050884]	1
ENSGALG00000010233	1.28551	-1.49901	-3.10328	0.0111767	0.366873	SYNDIG1L	synapse differentiation inducing 1 like [Source:NCBI gene;Acc:423351]	5
ENSGALG00000026163	3.93626	-0.714982	-3.1031	0.01118	0.366873	TNFSF11	tumor necrosis factor superfamily member 11 [Source:NCBI gene;Acc:428067]	1
ENSGALG00000050269	3.55015	0.469105	3.10313	0.0111795	0.366873			4
ENSGALG00000005826	1.10549	-0.717152	-3.09894	0.0112597	0.367177	DLEC1	deleted in lung and esophageal cancer 1 [Source:NCBI gene;Acc:420418]	2
ENSGALG00000010921	5.08396	-0.352596	-3.09967	0.0112457	0.367177	PKD2	polycystin 2	transient receptor potential cation channel [Source:NCBI gene;Acc:422585]	4
ENSGALG00000041604	0.106673	-0.96091	-3.09835	0.011271	0.367177	NPTXR	neuronal pentraxin receptor [Source:NCBI gene;Acc:427902]	1
ENSGALG00000015208	3.81263	-0.500701	-3.08774	0.0114767	0.372978	ROR2	receptor tyrosine kinase like orphan receptor 2 [Source:NCBI gene;Acc:769516]	Z
ENSGALG00000013728	5.51158	0.360904	3.08495	0.0115313	0.373302	PPAT	phosphoribosyl pyrophosphate amidotransferase [Source:NCBI gene;Acc:422743]	4
ENSGALG00000039872	4.02844	-0.792283	-3.08441	0.011542	0.373302	PDLIM4	PDZ and LIM domain 4 [Source:NCBI gene;Acc:395643]	13
ENSGALG00000036969	3.19926	0.890824	3.08269	0.011576	0.373505	KLHL14	kelch like family member 14 [Source:NCBI gene;Acc:421100]	2
ENSGALG00000004270	7.06005	-0.68252	-3.07984	0.0116323	0.373642	ALDH1A2	aldehyde dehydrogenase 1 family member A2 [Source:NCBI gene;Acc:395844]	10
ENSGALG00000050182	0.332891	1.78569	3.07967	0.0116356	0.373642		GTPase IMAP family member 7-like 5 [Source:NCBI gene;Acc:101751647]	2
ENSGALG00000003485	6.61858	0.640996	3.07279	0.0117729	0.376768	CCND3	cyclin D3 [Source:NCBI gene;Acc:419928]	26
ENSGALG00000009134	3.42346	-0.656757	-3.07066	0.0118157	0.376768	CTTNBP2	cortactin binding protein 2 [Source:NCBI gene;Acc:417766]	1
ENSGALG00000015958	5.43363	-0.495166	-3.06406	0.0119496	0.376768	EIF2AK3	eukaryotic translation initiation factor 2 alpha kinase 3 [Source:NCBI gene;Acc:422930]	4
ENSGALG00000017062	3.42066	-0.567974	-3.06316	0.0119679	0.376768	NBEA	neurobeachin [Source:NCBI gene;Acc:395195]	1
ENSGALG00000037249	1.58357	-0.83434	-3.06424	0.0119458	0.376768	KCNQ5	potassium voltage-gated channel subfamily Q member 5 [Source:NCBI gene;Acc:421866]	3
ENSGALG00000042422	2.91965	-0.704026	-3.06236	0.0119844	0.376768	GLI1	GLI family zinc finger 1 [Source:NCBI gene;Acc:396045]	33
ENSGALG00000046955	0.495701	-0.898284	-3.06523	0.0119258	0.376768			14
ENSGALG00000047290	1.92153	-1.4641	-3.0639	0.011953	0.376768	KIAA1755	KIAA1755 ortholog [Source:NCBI gene;Acc:101750666]	20
ENSGALG00000051041	2.69705	0.871542	3.06264	0.0119785	0.376768			33
ENSGALG00000021542	0.505349	-1.84671	-3.05903	0.0120527	0.378033	SNCB	synuclein beta [Source:NCBI gene;Acc:395391]	13
ENSGALG00000001561	6.74388	-0.40802	-3.05759	0.0120822	0.378081	MXRA8	matrix remodeling associated 8 [Source:NCBI gene;Acc:395347]	21
ENSGALG00000019147	4.42156	0.848731	3.05202	0.0121977	0.380812		granulocyte-macrophage colony-stimulating factor receptor subunit alpha-like [Source:NCBI gene;Acc:418667]	1
ENSGALG00000032997	3.96305	-0.790616	-3.04466	0.0123518	0.384732	EMILIN2	elastin microfibril interfacer 2 [Source:NCBI gene;Acc:421058]	2
ENSGALG00000023443	6.34061	0.386001	3.03833	0.012486	0.387125	SMIM15	small integral membrane protein 15 [Source:NCBI gene;Acc:770642]	Z
ENSGALG00000027255	-0.0724088	1.01645	3.03966	0.0124579	0.387125	NRXN3	neurexin 3 [Source:NCBI gene;Acc:423385]	5
ENSGALG00000002193	1.06884	-1.16073	-3.03584	0.0125392	0.387882		Rho guanine nucleotide exchange factor 4 [Source:HGNC Symbol;Acc:HGNC:684]	9
ENSGALG00000015528	3.22641	0.854106	3.03414	0.0125757	0.38812	JAKMIP1	janus kinase and microtubule interacting protein 1 [Source:NCBI gene;Acc:422854]	4
ENSGALG00000032090	6.8884	0.512081	3.03238	0.0126136	0.388401	TXNDC9	thioredoxin domain containing 9 [Source:NCBI gene;Acc:418702]	1
ENSGALG00000002675	1.83499	-2.24937	-3.02822	0.0127035	0.389634	SCUBE3	signal peptide	CUB domain and EGF like domain containing 3 [Source:NCBI gene;Acc:419896]	26
ENSGALG00000006344	6.18269	0.459955	3.02653	0.0127403	0.389634	GSTT1	glutathione S-transferase theta 1 [Source:NCBI gene;Acc:396322]	15
ENSGALG00000016602	3.15354	-0.511577	-3.0274	0.0127214	0.389634	ARHGAP6	Rho GTPase activating protein 6 [Source:NCBI gene;Acc:418642]	1
ENSGALG00000000632	3.3399	0.527182	3.02179	0.0128438	0.39191	CHTF8	chromosome transmission fidelity factor 8 [Source:NCBI gene;Acc:769609]	11
ENSGALG00000002421	3.90418	0.886225	3.01978	0.0128881	0.392166	FAM213A	family with sequence similarity 213 member A [Source:NCBI gene;Acc:423625]	6
ENSGALG00000042275	3.38664	-0.644559	-3.01877	0.0129103	0.392166		transducin-like enhancer protein 1-like [Source:NCBI gene;Acc:100857637]	28
ENSGALG00000030904	9.10938	-0.607429	-3.01657	0.0129589	0.392756	LRP1	LDL receptor related protein 1 [Source:NCBI gene;Acc:396170]	33
ENSGALG00000003742	7.69811	-1.21869	-3.01313	0.0130354	0.394189	CPAMD8	C3 and PZP like	alpha-2-macroglobulin domain containing 8 [Source:NCBI gene;Acc:420138]	28
ENSGALG00000004653	1.36736	0.968717	3.00838	0.0131416	0.39629			6
ENSGALG00000009927	7.99881	0.385761	3.00631	0.0131882	0.39629	RAP1B	RAP1B	member of RAS oncogene family [Source:NCBI gene;Acc:417840]	1
ENSGALG00000010583	5.96465	-1.12668	-3.0061	0.013193	0.39629	VIT	vitrin [Source:NCBI gene;Acc:421471]	3
ENSGALG00000002911	6.72095	-0.855843	-3.00188	0.0132883	0.398266	MOXD1	monooxygenase DBH like 1 [Source:NCBI gene;Acc:395333]	3
ENSGALG00000040184	3.95216	-0.390435	-2.99983	0.013335	0.398779	RIMKLB	ribosomal modification protein rimK like family member B [Source:NCBI gene;Acc:418255]	1
ENSGALG00000010370	3.13194	-0.496521	-2.99672	0.0134061	0.400019	MED12L	mediator complex subunit 12 like [Source:NCBI gene;Acc:425036]	9
ENSGALG00000008436	5.69887	-0.310051	-2.98815	0.0136041	0.403071	CRY2	cryptochrome circadian regulator 2 [Source:NCBI gene;Acc:374092]	5
ENSGALG00000011205	4.86153	-0.76206	-2.98712	0.013628	0.403071	SMOC2	SPARC related modular calcium binding 2 [Source:NCBI gene;Acc:421559]	3
ENSGALG00000033956	4.95436	0.521228	2.99012	0.0135583	0.403071	SFXN1	sideroflexin 1 [Source:NCBI gene;Acc:416221]	13
ENSGALG00000043662	2.97336	-0.485513	-2.9881	0.0136052	0.403071	NDRG4	NDRG family member 4 [Source:NCBI gene;Acc:768618]	11
ENSGALG00000029702	6.78132	-0.340056	-2.9842	0.0136962	0.404204		formin binding protein 4 [Source:NCBI gene;Acc:426631]	5
ENSGALG00000054319	3.50059	-0.422754	-2.98192	0.0137497	0.404895	ELOVL6	ELOVL fatty acid elongase 6 [Source:NCBI gene;Acc:428772]	4
ENSGALG00000011894	3.64156	-0.641834	-2.97727	0.0138595	0.406529	CYP2D6	cytochrome P450 family 2 subfamily D member 6 [Source:NCBI gene;Acc:417981]	1
ENSGALG00000016912	-0.591996	-1.11733	-2.97702	0.0138655	0.406529	EDNRB	endothelin receptor type B [Source:NCBI gene;Acc:408082]	1
ENSGALG00000028250	1.12991	1.05798	2.9754	0.0139039	0.406771	ANKRD22	ankyrin repeat domain 22 [Source:NCBI gene;Acc:771419]	6
ENSGALG00000002598	6.04207	-0.431045	-2.97022	0.0140277	0.40733	TPST1	tyrosylprotein sulfotransferase 1 [Source:NCBI gene;Acc:417546]	19
ENSGALG00000003081	5.72192	-0.547864	-2.97005	0.0140318	0.40733	SUCO	SUN domain containing ossification factor [Source:NCBI gene;Acc:424385]	8
ENSGALG00000038242	3.05259	-0.467976	-2.96955	0.0140438	0.40733	CACNA2D2	calcium voltage-gated channel auxiliary subunit alpha2delta 2 [Source:NCBI gene;Acc:430150]	12
ENSGALG00000054034	5.84229	-0.409699	-2.97	0.0140329	0.40733	TNKS1BP1	tankyrase 1 binding protein 1 [Source:NCBI gene;Acc:423136]	5
ENSGALG00000002415	5.56869	0.330197	2.96487	0.0141568	0.409726	SAP30BP	SAP30 binding protein [Source:NCBI gene;Acc:417375]	18
ENSGALG00000036021	1.3915	-0.829289	-2.95929	0.0142926	0.411879	MTMR7	myotubularin related protein 7 [Source:NCBI gene;Acc:422731]	4
ENSGALG00000036754	4.71377	-0.383507	-2.9601	0.0142726	0.411879	CHKA	choline kinase alpha [Source:NCBI gene;Acc:423112]	5
ENSGALG00000040754	1.71865	1.81342	2.95805	0.0143228	0.411879	CYP1C1	cytochrome P450 family 1 subfamily C polypeptide 1 [Source:NCBI gene;Acc:428832]	5
ENSGALG00000035563	4.55906	-0.700786	-2.95523	0.0143922	0.412117	USP6NL	USP6 N-terminal like [Source:NCBI gene;Acc:419104]	1
ENSGALG00000043598	7.47476	0.600495	2.95567	0.0143814	0.412117			MT
ENSGALG00000026862	-0.593843	-1.30034	-2.95398	0.0144229	0.412122	CLDN1	claudin 1 [Source:NCBI gene;Acc:424910]	9
ENSGALG00000001270	4.03574	-0.579683	-2.95221	0.0144667	0.412498	PRKCZ	protein kinase C zeta [Source:NCBI gene;Acc:419399]	21
ENSGALG00000034119	7.72245	-1.03201	-2.9504	0.0145118	0.412912		collagen type XV alpha 1 chain [Source:NCBI gene;Acc:420803]	2
ENSGALG00000050983	2.29402	-0.886741	-2.94824	0.0145654	0.413564			6
ENSGALG00000047813	5.6375	-0.468186	-2.94371	0.0146787	0.415907		amyloid beta precursor protein binding family B member 2 [Source:NCBI gene;Acc:422781]	4
ENSGALG00000040101	5.4446	1.03042	2.9411	0.0147445	0.416895			16
ENSGALG00000005657	0.0455478	-0.891475	-2.93318	0.0149457	0.421382	CRHR2	corticotropin releasing hormone receptor 2 [Source:NCBI gene;Acc:395105]	2
ENSGALG00000021074	7.59304	-1.44905	-2.93241	0.0149657	0.421382	MYOC	myocilin [Source:NCBI gene;Acc:424391]	8
ENSGALG00000006891	2.74159	-1.3184	-2.93107	0.0149999	0.421465	ITIH5	inter-alpha-trypsin inhibitor heavy chain family member 5 [Source:NCBI gene;Acc:419111]	1
ENSGALG00000001239	5.69796	-0.743391	-2.91082	0.0155293	0.421568	SLC26A2	E3 ubiquitin/ISG15 ligase TRIM25-like [Source:NCBI gene;Acc:416147]	13
ENSGALG00000001434	4.20152	0.631071	2.92235	0.0152257	0.421568	STOM	stomatin [Source:NCBI gene;Acc:417118]	17
ENSGALG00000001728	3.39843	-0.474629	-2.9105	0.0155378	0.421568	NACC2	NACC family member 2 [Source:NCBI gene;Acc:417128]	17
ENSGALG00000003747	5.87744	-0.541982	-2.9103	0.0155432	0.421568		oncostatin M receptor [Source:NCBI gene;Acc:427446]	Z
ENSGALG00000005321	5.1387	-0.668949	-2.91607	0.0153902	0.421568	LAMA5	laminin subunit alpha 5 [Source:NCBI gene;Acc:428148]	20
ENSGALG00000006445	3.00137	-0.50227	-2.92384	0.0151868	0.421568	ARNT2	aryl hydrocarbon receptor nuclear translocator 2 [Source:NCBI gene;Acc:415481]	10
ENSGALG00000006785	6.30969	0.537348	2.92756	0.0150904	0.421568	IRF1	interferon regulatory factor 1 [Source:NCBI gene;Acc:396384]	13
ENSGALG00000007262	5.88179	0.402698	2.92229	0.0152271	0.421568	SPG21	spastic paraplegia 21 (autosomal recessive	Mast syndrome) [Source:NCBI gene;Acc:415526]	10
ENSGALG00000008409	6.10592	0.554359	2.92922	0.0150475	0.421568	GSTO2	glutathione S-transferase omega 2 [Source:NCBI gene;Acc:423881]	6
ENSGALG00000009693	-0.168677	-2.31796	-2.91433	0.0154364	0.421568			6
ENSGALG00000013356	3.50573	0.661444	2.91421	0.0154394	0.421568	IKBKE	inhibitor of kappa light polypeptide gene enhancer in B-cells	kinase epsilon [Source:NCBI gene;Acc:430480]	26
ENSGALG00000016102	2.82612	-0.639002	-2.91306	0.0154699	0.421568	CYP26B1	cytochrome P450 family 26 subfamily B member 1 [Source:NCBI gene;Acc:428809]	4
ENSGALG00000016325	4.68212	0.548395	2.90963	0.015561	0.421568	GSTA3	glutathione S-transferase alpha 3 [Source:NCBI gene;Acc:414896]	3
ENSGALG00000023521	-0.0169978	-1.95727	-2.91057	0.015536	0.421568	ADRA2A	adrenoceptor alpha 2A [Source:NCBI gene;Acc:428980]	6
ENSGALG00000040730	0.72293	-1.58754	-2.92017	0.0152825	0.421568	RXRG	retinoid X receptor gamma [Source:NCBI gene;Acc:396231]	8
ENSGALG00000040840	6.02061	0.495137	2.90944	0.0155662	0.421568	MPST	mercaptopyruvate sulfurtransferase [Source:NCBI gene;Acc:418048]	1
ENSGALG00000043287	4.74563	-0.799869	-2.91408	0.0154427	0.421568	CAV1	caveolin 1 [Source:NCBI gene;Acc:373996]	1
ENSGALG00000043448	4.03363	0.735176	2.91331	0.0154631	0.421568	ABLIM2	actin binding LIM protein family member 2 [Source:NCBI gene;Acc:422866]	4
ENSGALG00000009514	0.731189	-1.31715	-2.90741	0.0156205	0.422191	NRCAM	neuronal cell adhesion molecule [Source:NCBI gene;Acc:396202]	1
ENSGALG00000012321	5.47496	-0.37138	-2.90585	0.0156621	0.422471	MAP4K5	mitogen-activated protein kinase kinase kinase kinase 5 [Source:NCBI gene;Acc:423576]	5
ENSGALG00000000284	-0.537156	-1.43794	-2.89905	0.0158458	0.424212	HOXB4	homeobox B4 [Source:NCBI gene;Acc:396230]	27
ENSGALG00000003446	0.169137	-1.35456	-2.89773	0.0158815	0.424212	PRLR	prolactin receptor [Source:NCBI gene;Acc:395660]	Z
ENSGALG00000003802	2.69604	-0.654932	-2.89893	0.0158489	0.424212	OTUD7A	OTU deubiquitinase 7A [Source:NCBI gene;Acc:415380]	10
ENSGALG00000005257	9.04401	0.957793	2.89649	0.0159154	0.424212		vascular cell adhesion molecule 1 [Source:NCBI gene;Acc:424467]	8
ENSGALG00000005337	6.98102	0.454873	2.90035	0.0158106	0.424212	SNX2	sorting nexin 2 [Source:NCBI gene;Acc:426797]	Z
ENSGALG00000035839	4.22146	0.695649	2.89745	0.0158893	0.424212	TMEM255B	transmembrane protein 255B [Source:NCBI gene;Acc:418738]	1
ENSGALG00000000364	0.917191	-0.935508	-2.86605	0.0167679	0.424295	STC1	stanniocalcin 1 [Source:NCBI gene;Acc:428201]	22
ENSGALG00000001229	3.59711	-0.720536	-2.87539	0.0165016	0.424295	SKI	SKI proto-oncogene [Source:NCBI gene;Acc:428181]	21
ENSGALG00000002647	3.61944	1.43939	2.883	0.0162876	0.424295	PLS1	plastin 1 [Source:NCBI gene;Acc:396291]	9
ENSGALG00000004860	2.29471	-1.45061	-2.86495	0.0167995	0.424295	RASD1	ras related dexamethasone induced 1 [Source:NCBI gene;Acc:416507]	14
ENSGALG00000010616	3.37022	-0.691246	-2.87225	0.0165906	0.424295	PTPN21	protein tyrosine phosphatase	non-receptor type 21 [Source:NCBI gene;Acc:423398]	5
ENSGALG00000010744	4.70049	-0.41428	-2.86559	0.0167811	0.424295	GALNT7	polypeptide N-acetylgalactosaminyltransferase 7 [Source:NCBI gene;Acc:422561]	4
ENSGALG00000012421	4.60609	0.79244	2.86588	0.0167729	0.424295	ARHGAP15	Rho GTPase activating protein 15 [Source:NCBI gene;Acc:424303]	7
ENSGALG00000012559	3.68002	-0.460867	-2.88477	0.0162383	0.424295	LARGE1	LARGE xylosyl- and glucuronyltransferase 1 [Source:NCBI gene;Acc:418062]	1
ENSGALG00000016692	4.71004	0.520244	2.86755	0.0167247	0.424295	CENPQ	centromere protein Q [Source:NCBI gene;Acc:422048]	3
ENSGALG00000024049	-0.38397	-0.946791	-2.88097	0.0163445	0.424295	RAB33A	RNA binding motif protein	X-linked 2 [Source:NCBI gene;Acc:769358]	4
ENSGALG00000027641	4.93907	-0.628379	-2.8663	0.0167608	0.424295	DUSP14	dual specificity phosphatase 14 [Source:NCBI gene;Acc:417657]	19
ENSGALG00000027980	0.781302	-1.60171	-2.88286	0.0162915	0.424295	NANOS1	nanos C2HC-type zinc finger 1 [Source:NCBI gene;Acc:100857342]	6
ENSGALG00000028077	-0.259133	-1.10755	-2.89114	0.016062	0.424295			4
ENSGALG00000030291	3.41661	0.774346	2.87913	0.0163961	0.424295	IRF9	interferon regulatory factor 9 [Source:NCBI gene;Acc:395243]	20
ENSGALG00000031527	5.15087	1.05096	2.87261	0.0165803	0.424295	ARL8BL	ADP-ribosylation factor-like 8B-like [Source:NCBI gene;Acc:769134]	1
ENSGALG00000033091	2.06572	-0.633933	-2.86386	0.0168309	0.424295	RUNX1T1	RUNX1 translocation partner 1 [Source:NCBI gene;Acc:395503]	2
ENSGALG00000033694	7.99131	0.571035	2.8933	0.0160026	0.424295	IFI30	IFI30	lysosomal thiol reductase [Source:NCBI gene;Acc:420129]	28
ENSGALG00000034213	4.83622	0.405303	2.87755	0.0164406	0.424295	TNFRSF1B	TNF receptor superfamily member 1B [Source:NCBI gene;Acc:395083]	21
ENSGALG00000035369	4.3523	0.463607	2.87898	0.0164003	0.424295		dual specificity phosphatase 3 [Source:NCBI gene;Acc:425527]	27
ENSGALG00000035584	10.1287	-0.7733	-2.86388	0.0168302	0.424295	COL3A1	collagen type III alpha 1 chain [Source:NCBI gene;Acc:396340]	7
ENSGALG00000039155	3.58771	-0.602337	-2.86477	0.0168048	0.424295	ZHX3	zinc fingers and homeoboxes 3 [Source:NCBI gene;Acc:419176]	20
ENSGALG00000039327	6.02644	0.497559	2.88723	0.0161701	0.424295	VAV3	vav 3 guanine nucleotide exchange factor [Source:NCBI gene;Acc:373939]	8
ENSGALG00000040896	7.09452	-0.481387	-2.87116	0.0166216	0.424295	FASN	fatty acid synthase [Source:NCBI gene;Acc:396061]	18
ENSGALG00000041140	7.6244	-0.481291	-2.87964	0.0163817	0.424295	HTRA1	HtrA serine peptidase 1 [Source:NCBI gene;Acc:100857572]	6
ENSGALG00000041183	2.08048	-0.648704	-2.87816	0.0164233	0.424295	SGPP1	sphingosine-1-phosphate phosphatase 1 [Source:HGNC Symbol;Acc:HGNC:17720]	5
ENSGALG00000043208	5.41763	0.563206	2.87376	0.0165478	0.424295	TRAFD1	TRAF-type zinc finger domain containing 1 [Source:NCBI gene;Acc:416884]	15
ENSGALG00000048488	1.26317	-0.96833	-2.87851	0.0164134	0.424295			6
ENSGALG00000050125	1.90435	-0.929026	-2.8938	0.015989	0.424295			32
ENSGALG00000050327	2.82395	0.847936	2.86808	0.0167096	0.424295		uncharacterized LOC101750509 [Source:NCBI gene;Acc:101750509]	1
ENSGALG00000000404	6.98981	0.496058	2.82037	0.0181345	0.42446	COPS2	COP9 signalosome subunit 2 [Source:NCBI gene;Acc:430917]	10
ENSGALG00000002389	3.82445	-0.707011	-2.85476	0.0170956	0.42446		integrin subunit beta 4 [Source:NCBI gene;Acc:417374]	18
ENSGALG00000004122	7.75412	0.350415	2.79683	0.0188821	0.42446	PNRC2	proline rich nuclear receptor coactivator 2 [Source:NCBI gene;Acc:419688]	23
ENSGALG00000004521	8.73254	0.492654	2.85154	0.0171905	0.42446	GPX3	glutathione peroxidase 3 [Source:NCBI gene;Acc:427638]	13
ENSGALG00000004974	4.69492	0.926205	2.81964	0.0181571	0.42446	PPARG	peroxisome proliferator-activated receptor gamma [Source:NCBI gene;Acc:373928]	12
ENSGALG00000005345	2.34405	-0.511669	-2.85398	0.0171185	0.42446	CABLES2	Cdk5 and Abl enzyme substrate 2 [Source:NCBI gene;Acc:419229]	20
ENSGALG00000005418	6.7129	0.478738	2.85961	0.016954	0.42446	FRRS1	ferric chelate reductase 1 [Source:NCBI gene;Acc:429082]	8
ENSGALG00000006982	4.777	-0.531429	-2.81931	0.0181675	0.42446	EEF2K	eukaryotic elongation factor 2 kinase [Source:NCBI gene;Acc:416619]	14
ENSGALG00000007685	4.89889	-0.512741	-2.83971	0.0175426	0.42446	BCL9L	B-cell CLL/lymphoma 9-like [Source:NCBI gene;Acc:419785]	24
ENSGALG00000008015	5.51262	0.349557	2.81416	0.0183289	0.42446	UBE2V1	ubiquitin conjugating enzyme E2 V1 [Source:NCBI gene;Acc:100538349]	20
ENSGALG00000008141	1.84305	-1.23447	-2.83442	0.0177027	0.42446			4
ENSGALG00000008529	4.91533	0.340779	2.83972	0.0175423	0.42446	FASTKD2	FAST kinase domains 2 [Source:NCBI gene;Acc:424096]	7
ENSGALG00000008757	5.50549	0.648658	2.79866	0.0188228	0.42446	CNRIP1	cannabinoid receptor interacting protein 1 [Source:NCBI gene;Acc:421266]	3
ENSGALG00000008845	-0.592948	0.868213	2.79626	0.0189006	0.42446	HAO1	hydroxyacid oxidase 1 [Source:NCBI gene;Acc:416728]	3
ENSGALG00000008858	8.52519	0.468744	2.80047	0.0187645	0.42446	MDH1	malate dehydrogenase 1 [Source:NCBI gene;Acc:421281]	3
ENSGALG00000009075	5.9945	-0.350756	-2.82553	0.0179746	0.42446	CD99L2	CD99 molecule like 2 [Source:NCBI gene;Acc:422386]	4
ENSGALG00000009312	8.00346	0.782271	2.83315	0.0177411	0.42446	RPL22L1	ribosomal protein L22 like 1 [Source:NCBI gene;Acc:100858296]	9
ENSGALG00000009704	7.32828	0.617429	2.8411	0.0175011	0.42446	CHST15	carbohydrate sulfotransferase 15 [Source:NCBI gene;Acc:423952]	6
ENSGALG00000009940	7.15334	-0.534017	-2.8175	0.018224	0.42446	SLC35E3	solute carrier family 35 member E3 [Source:NCBI gene;Acc:417842]	1
ENSGALG00000010243	9.65445	0.676938	2.84153	0.017488	0.42446	PRDX1	peroxiredoxin 1 [Source:NCBI gene;Acc:424598]	8
ENSGALG00000011121	5.80045	-0.897609	-2.84011	0.0175307	0.42446	SLC35D1	solute carrier family 35 member D1 [Source:NCBI gene;Acc:424703]	8
ENSGALG00000011250	0.552343	1.49034	2.79885	0.0188168	0.42446	ASIC4	acid sensing ion channel subunit family member 4 [Source:NCBI gene;Acc:769191]	7
ENSGALG00000011356	1.40808	-0.845941	-2.80622	0.0185803	0.42446		glutamate-rich protein 3 [Source:NCBI gene;Acc:424719]	8
ENSGALG00000011405	4.85542	-0.495693	-2.80784	0.0185288	0.42446	SLC4A7	solute carrier family 4 member 7 [Source:NCBI gene;Acc:420658]	2
ENSGALG00000011571	4.87511	-0.376037	-2.85675	0.0170373	0.42446	AGPAT4	1-acylglycerol-3-phosphate O-acyltransferase 4 [Source:NCBI gene;Acc:421578]	3
ENSGALG00000011970	5.86231	-1.3103	-2.86108	0.0169115	0.42446	CHADL	chondroadherin-like [Source:NCBI gene;Acc:417998]	1
ENSGALG00000012101	4.75615	0.352692	2.82637	0.0179487	0.42446	AP5M1	adaptor related protein complex 5 mu 1 subunit [Source:NCBI gene;Acc:423548]	5
ENSGALG00000012731	4.59575	0.58071	2.83492	0.0176874	0.42446	TBC1D7	TBC1 domain family member 7 [Source:NCBI gene;Acc:420853]	2
ENSGALG00000013715	5.75664	-0.369895	-2.82322	0.0180461	0.42446	DLC1	DLC1 Rho GTPase activating protein [Source:NCBI gene;Acc:422740]	4
ENSGALG00000013742	5.22386	-0.419697	-2.83776	0.0176014	0.42446	EZR	ezrin [Source:NCBI gene;Acc:395701]	3
ENSGALG00000014122	7.22546	-0.336542	-2.83496	0.0176863	0.42446	CYB5R1	cytochrome b5 reductase 1 [Source:NCBI gene;Acc:418220]	1
ENSGALG00000014804	1.96371	-0.940711	-2.80268	0.0186936	0.42446	THBS4	thrombospondin 4 [Source:NCBI gene;Acc:396306]	Z
ENSGALG00000014877	6.60693	0.577285	2.81233	0.0183863	0.42446	EMB	embigin [Source:NCBI gene;Acc:395242]	Z
ENSGALG00000015284	2.3707	-0.529477	-2.81703	0.0182389	0.42446	RGMB	repulsive guidance molecule family member b [Source:NCBI gene;Acc:427277]	Z
ENSGALG00000015546	5.25422	-0.403202	-2.79881	0.018818	0.42446	TBC1D14	TBC1 domain family member 14 [Source:NCBI gene;Acc:422862]	4
ENSGALG00000016283	4.16299	-0.580411	-2.79583	0.0189145	0.42446	BEND6	BEN domain containing 6 [Source:NCBI gene;Acc:775985]	3
ENSGALG00000016301	0.809085	0.964895	2.80131	0.0187374	0.42446		muscular LMNA interacting protein [Source:NCBI gene;Acc:421889]	3
ENSGALG00000016761	6.19376	0.997077	2.82789	0.0179021	0.42446	LYG2	lysozyme g2 [Source:NCBI gene;Acc:395708]	1
ENSGALG00000017072	5.65779	0.568492	2.834	0.0177155	0.42446		NEDD4 binding protein 2 like 1 [Source:NCBI gene;Acc:418914]	1
ENSGALG00000017119	7.22361	0.690022	2.83075	0.0178144	0.42446	TNFRSF19	TNF receptor superfamily member 19 [Source:NCBI gene;Acc:418943]	1
ENSGALG00000017208	5.06821	-0.417848	-2.82516	0.0179861	0.42446	AMOTL1	angiomotin like 1 [Source:NCBI gene;Acc:428091]	1
ENSGALG00000019384	3.17208	0.637898	2.84817	0.01729	0.42446	MAPK12	mitogen-activated protein kinase 12 [Source:NCBI gene;Acc:769763]	1
ENSGALG00000024428	0.526412	-5.06772	-2.85638	0.0170481	0.42446	C18H17ORF67	chromosome 18 open reading frame	human C17orf67 [Source:NCBI gene;Acc:417400]	18
ENSGALG00000026119	1.90777	-0.845085	-2.81933	0.018167	0.42446	MN1	MN1 proto-oncogene	transcriptional regulator [Source:NCBI gene;Acc:416911]	15
ENSGALG00000026146	0.444362	-0.829422	-2.81854	0.0181916	0.42446	CRLF1	cytokine receptor like factor 1 [Source:NCBI gene;Acc:100858730]	28
ENSGALG00000026373	2.83041	-0.834895	-2.81404	0.0183326	0.42446	KCNJ8	Potassium inwardly rectifying channel subfamily J member 8 [Source:NCBI gene;Acc:395973]	1
ENSGALG00000026383	10.8126	0.404086	2.8126	0.0183779	0.42446	TMSB4X	thymosin beta 4	X-linked [Source:NCBI gene;Acc:408047]	1
ENSGALG00000030151	1.31379	1.33404	2.81514	0.0182979	0.42446	LUZP2	leucine zipper protein 2 [Source:NCBI gene;Acc:423001]	5
ENSGALG00000030603	1.40343	-1.05673	-2.80675	0.0185633	0.42446	ANTXR1	anthrax toxin receptor 1 [Source:NCBI gene;Acc:428199]	22
ENSGALG00000030661	5.13448	0.451389	2.8352	0.017679	0.42446	STAT2	signal transducer and activator of transcription 2 [Source:NCBI gene;Acc:100858732]	33
ENSGALG00000031094	2.26143	-0.522816	-2.8454	0.0173725	0.42446	EDA2R	ectodysplasin A2 receptor [Source:NCBI gene;Acc:422166]	4
ENSGALG00000034456	8.22738	-0.849677	-2.86061	0.016925	0.42446	PRELP	proline and arginine rich end leucine rich repeat protein [Source:NCBI gene;Acc:419933]	26
ENSGALG00000035239	5.70708	-0.303679	-2.80516	0.018614	0.42446	GLCCI1	glucocorticoid induced 1 [Source:NCBI gene;Acc:420580]	2
ENSGALG00000035856	6.98523	0.54786	2.79708	0.0188738	0.42446	CD48	CD48 molecule [Source:NCBI gene;Acc:100859319]	25
ENSGALG00000035945	-0.54349	-2.26483	-2.85143	0.0171937	0.42446		fibulin 7 [Source:NCBI gene;Acc:427533]	11
ENSGALG00000036043	0.983935	-1.09837	-2.83208	0.0177739	0.42446	TBX3	T-box 3 [Source:NCBI gene;Acc:374202]	15
ENSGALG00000036391	7.6702	-0.574199	-2.80015	0.0187748	0.42446	GFPT1	glutamine--fructose-6-phosphate transaminase 1 [Source:NCBI gene;Acc:419514]	22
ENSGALG00000036447	0.216882	-1.21195	-2.81922	0.0181702	0.42446			1
ENSGALG00000040823	5.39308	0.337975	2.79995	0.0187811	0.42446	CHRAC1	chromatin accessibility complex 1 [Source:NCBI gene;Acc:100858071]	2
ENSGALG00000043118	6.52756	-0.540948	-2.83279	0.0177521	0.42446	ATP10A	ATPase phospholipid transporting 10A (putative) [Source:NCBI gene;Acc:418685]	1
ENSGALG00000043393	3.61341	-0.831662	-2.83567	0.0176647	0.42446	CADM2	cell adhesion molecule 2 [Source:NCBI gene;Acc:418463]	1
ENSGALG00000045671	5.84954	-0.363492	-2.8337	0.0177245	0.42446		uncharacterized LOC416755 [Source:NCBI gene;Acc:416755]	14
ENSGALG00000047526	-0.294154	-1.17548	-2.85713	0.0170263	0.42446		proto-oncogene Mas-like [Source:NCBI gene;Acc:430433]	5
ENSGALG00000048020	1.11767	-0.982607	-2.83402	0.0177149	0.42446		cohesin subunit SA-3-like [Source:NCBI gene;Acc:107050518]	30
ENSGALG00000048539	2.52786	-1.05538	-2.79758	0.0188576	0.42446	BHLHE41	basic helix-loop-helix family member e41 [Source:NCBI gene;Acc:101750689]	1
ENSGALG00000051765	5.44097	-0.399476	-2.79737	0.0188645	0.42446			2
ENSGALG00000001445	1.77983	0.904241	2.79351	0.0189899	0.424943	FABP6	fatty acid binding protein 6 [Source:NCBI gene;Acc:416154]	13
ENSGALG00000039200	2.24926	-0.657012	-2.79323	0.0189991	0.424943	AXIN2	axin 2 [Source:NCBI gene;Acc:395152]	18
ENSGALG00000006354	-0.517285	-0.793997	-2.78438	0.0192899	0.428578	GAL3ST2	galactose-3-O-sulfotransferase 2 [Source:NCBI gene;Acc:424854]	9
ENSGALG00000016668	5.07581	1.03535	2.78416	0.0192971	0.428578	AvBD6	avian beta-defensin 6 [Source:NCBI gene;Acc:407776]	3
ENSGALG00000038820	3.88961	0.615127	2.78346	0.0193205	0.428578		mitochondrial ribosomal protein L55 [Source:NCBI gene;Acc:100858219]	2
ENSGALG00000039705	6.69675	-1.0453	-2.78605	0.0192346	0.428578	GFPT2	glutamine-fructose-6-phosphate transaminase 2 [Source:NCBI gene;Acc:426962]	13
ENSGALG00000041687	7.33235	-0.554184	-2.78399	0.0193029	0.428578	SREBF2	sterol regulatory element binding transcription factor 2 [Source:NCBI gene;Acc:395304]	1
ENSGALG00000028803	4.14807	-1.01785	-2.78039	0.0194224	0.430132	B3GNT4	UDP-GlcNAc:betaGal beta-1	3-N-acetylglucosaminyltransferase 4 [Source:HGNC Symbol;Acc:HGNC:15683]	15
ENSGALG00000030247	3.09788	1.49462	2.779	0.0194689	0.430455	TMOD4	tropomodulin 4 [Source:NCBI gene;Acc:395547]	25
ENSGALG00000015057	2.30414	-0.894828	-2.77779	0.0195092	0.430639	DDO	D-aspartate oxidase [Source:NCBI gene;Acc:770953]	3
ENSGALG00000004721	-0.0797198	0.994796	2.77066	0.0197497	0.433936		Potassium inwardly rectifying channel subfamily J member 12 [Source:NCBI gene;Acc:427662]	14
ENSGALG00000030229	1.91226	-1.03558	-2.76955	0.0197873	0.433936	CSMD2	CUB and Sushi multiple domains 2 [Source:NCBI gene;Acc:419640]	23
ENSGALG00000032702	5.21471	-0.414863	-2.77205	0.0197024	0.433936	ITGA3	integrin subunit alpha 3 [Source:NCBI gene;Acc:373946]	27
ENSGALG00000053670	2.24961	-0.679673	-2.7696	0.0197856	0.433936	MEGF9	multiple EGF like domains 9 [Source:HGNC Symbol;Acc:HGNC:3234]	17
ENSGALG00000016536	7.27257	0.308735	2.76782	0.0198462	0.434522	HADHA	hydroxyacyl-CoA dehydrogenase/3-ketoacyl-CoA thiolase/enoyl-CoA hydratase (trifunctional protein)	alpha subunit [Source:NCBI gene;Acc:395929]	3
ENSGALG00000037655	4.56282	-0.420373	-2.76643	0.0198935	0.434851	BCL9	B-cell CLL/lymphoma 9 [Source:NCBI gene;Acc:418456]	1
ENSGALG00000013568	0.781298	-0.995905	-2.76295	0.0200126	0.436747	NR4A3	nuclear receptor subfamily 4 group A member 3 [Source:NCBI gene;Acc:420996]	2
ENSGALG00000000667	-0.41938	-1.03074	-2.75627	0.0202437	0.438486	EDN2	endothelin 2 [Source:NCBI gene;Acc:419559]	23
ENSGALG00000001797	5.70633	-0.308996	-2.75129	0.0204174	0.438486	GPSM1	G-protein signaling modulator 1 [Source:NCBI gene;Acc:417132]	17
ENSGALG00000013594	5.39834	0.414573	2.75452	0.0203046	0.438486	PARD6G	par-6 family cell polarity regulator gamma [Source:NCBI gene;Acc:428511]	2
ENSGALG00000014096	5.2459	-0.396852	-2.75788	0.0201878	0.438486	ARNTL2	aryl hydrocarbon receptor nuclear translocator-like 2 [Source:NCBI gene;Acc:373925]	1
ENSGALG00000015677	5.53943	0.468682	2.75266	0.0203696	0.438486	SUSD1	sushi domain containing 1 [Source:NCBI gene;Acc:427334]	Z
ENSGALG00000015729	4.72687	-0.61838	-2.75259	0.0203717	0.438486	LPAR1	lysophosphatidic acid receptor 1 [Source:NCBI gene;Acc:427339]	Z
ENSGALG00000016684	6.18789	1.08468	2.75163	0.0204057	0.438486	RHAG	Rh associated glycoprotein [Source:NCBI gene;Acc:395118]	3
ENSGALG00000041255	5.27624	-0.937919	-2.75287	0.0203619	0.438486	ADAM12	ADAM metallopeptidase domain 12 [Source:NCBI gene;Acc:425843]	6
ENSGALG00000041693	1.70971	1.31061	2.75509	0.0202847	0.438486			18
ENSGALG00000052139	-0.444967	0.764231	2.75904	0.0201475	0.438486			8
ENSGALG00000002634	5.79122	0.297305	2.73409	0.0210293	0.439044	HDAC3	histone deacetylase 3 [Source:NCBI gene;Acc:395506]	13
ENSGALG00000003111	5.64551	0.366013	2.74685	0.0205736	0.439044	BFAR	bifunctional apoptosis regulator [Source:NCBI gene;Acc:416424]	14
ENSGALG00000004378	4.98965	0.507498	2.73557	0.0209761	0.439044	ASB6	ankyrin repeat and SOCS box containing 6 [Source:NCBI gene;Acc:417194]	17
ENSGALG00000005208	6.12116	0.373014	2.73958	0.0208321	0.439044	S1PR1	sphingosine-1-phosphate receptor 1 [Source:NCBI gene;Acc:424462]	8
ENSGALG00000005401	-0.401813	-1.07209	-2.74339	0.0206962	0.439044	WNT9A	Wnt family member 9A [Source:NCBI gene;Acc:395829]	2
ENSGALG00000005923	2.18352	1.62682	2.74748	0.0205514	0.439044	NPY4R	neuropeptide Y receptor Y4 [Source:NCBI gene;Acc:428955]	6
ENSGALG00000007367	0.957584	-2.42161	-2.7416	0.02076	0.439044	WFIKKN2	WAP	follistatin/kazal	immunoglobulin	kunitz and netrin domain containing 2 [Source:NCBI gene;Acc:422097]	18
ENSGALG00000009004	-0.961806	-1.28032	-2.73659	0.0209391	0.439044	ZNF804B	zinc finger protein 804B [Source:NCBI gene;Acc:420539]	2
ENSGALG00000019761	8.50358	-1.26638	-2.74006	0.0208148	0.439044		chondroadherin [Source:NCBI gene;Acc:769665]	18
ENSGALG00000022750	1.74927	1.01741	2.74539	0.0206253	0.439044	GPR18	G protein-coupled receptor 18 [Source:NCBI gene;Acc:100858263]	1
ENSGALG00000026359	3.50009	-0.511988	-2.73488	0.0210008	0.439044	SERTAD4	SERTA domain containing 4 [Source:HGNC Symbol;Acc:HGNC:25236]	3
ENSGALG00000028560	0.752164	-1.24933	-2.73566	0.0209726	0.439044	OC3	osteocalcin-like protein OC3 [Source:NCBI gene;Acc:417943]	1
ENSGALG00000034174	0.999751	-1.51241	-2.73652	0.0209419	0.439044			33
ENSGALG00000044841	3.79348	0.516614	2.73426	0.0210232	0.439044		tapasin-related protein-like [Source:NCBI gene;Acc:100857331]	19
ENSGALG00000047434	1.81683	-0.628482	-2.73556	0.0209764	0.439044			W
ENSGALG00000047838	2.63709	0.8507	2.74396	0.0206761	0.439044		immunoglobulin-like receptor [Source:NCBI gene;Acc:425238]	KZ626836.1
ENSGALG00000050403	1.02746	-0.675309	-2.73732	0.0209132	0.439044	LYPD1	LY6/PLAUR domain containing 1 [Source:NCBI gene;Acc:100859784]	7
ENSGALG00000050830	0.542806	-0.86627	-2.74546	0.0206228	0.439044	SV2A	synaptic vesicle glycoprotein 2A-like [Source:NCBI gene;Acc:101748017]	25
ENSGALG00000002666	4.96107	-0.635471	-2.7317	0.021116	0.439057	RAB11FIP3	RAB11 family interacting protein 3 [Source:NCBI gene;Acc:100857269]	14
ENSGALG00000003901	4.87649	-0.410129	-2.72153	0.0214878	0.439057	P2RX4	purinergic receptor P2X 4 [Source:NCBI gene;Acc:374166]	15
ENSGALG00000008629	4.50997	0.950174	2.72132	0.0214957	0.439057	MRC1	mannose receptor C-type 1 [Source:NCBI gene;Acc:420516]	2
ENSGALG00000011190	4.85265	0.824651	2.72918	0.0212072	0.439057	PLAC8	Placenta-specific gene 8-like 2 [Source:NCBI gene;Acc:100857411]	4
ENSGALG00000014754	4.05514	0.759513	2.73098	0.0211421	0.439057			1
ENSGALG00000016661	2.99249	0.609557	2.72796	0.0212518	0.439057	BLK	BLK proto-oncogene	Src family tyrosine kinase [Source:NCBI gene;Acc:422035]	3
ENSGALG00000023142	2.4851	0.87692	2.72214	0.0214654	0.439057	PTGER3	prostaglandin E receptor 3 [Source:NCBI gene;Acc:429116]	8
ENSGALG00000023517	5.27136	0.509964	2.71983	0.0215508	0.439057	AGPAT2	1-acylglycerol-3-phosphate O-acyltransferase 2 [Source:NCBI gene;Acc:772114]	17
ENSGALG00000023626	2.99883	-0.734914	-2.72422	0.0213889	0.439057	NTN1	netrin 1 [Source:NCBI gene;Acc:396389]	18
ENSGALG00000024379	4.39465	-0.424513	-2.72294	0.021436	0.439057		endothelial cell surface expressed chemotaxis and apoptosis regulator [Source:NCBI gene;Acc:416190]	13
ENSGALG00000027983	5.23937	-0.521413	-2.72024	0.0215357	0.439057		tyrosine kinase non receptor 2 [Source:NCBI gene;Acc:431014]	9
ENSGALG00000033971	1.12106	-0.697709	-2.72029	0.0215336	0.439057		TLE family member 2	transcriptional corepressor [Source:HGNC Symbol;Acc:HGNC:11838]	28
ENSGALG00000043234	12.7963	1.2417	2.72882	0.0212205	0.439057	HBA1	hemoglobin subunit alpha 1 [Source:NCBI gene;Acc:416652]	14
ENSGALG00000047761	4.47412	0.719478	2.72258	0.0214489	0.439057		uncharacterized LOC769729 [Source:NCBI gene;Acc:769729]	31
ENSGALG00000051047	1.83928	-0.69702	-2.7275	0.0212685	0.439057			31
ENSGALG00000054746	0.212519	-1.10632	-2.72963	0.0211911	0.439057			18
ENSGALG00000039411	-0.713992	-1.0629	-2.71667	0.0216677	0.440773	COL25A1	collagen type XXV alpha 1 chain [Source:HGNC Symbol;Acc:HGNC:18603]	4
ENSGALG00000011406	0.0519125	-0.914468	-2.71451	0.0217483	0.441746	NTN4	netrin 4 [Source:NCBI gene;Acc:417914]	1
ENSGALG00000016759	4.19361	0.820358	2.70968	0.0219295	0.444757	MITD1	microtubule interacting and trafficking domain containing 1 [Source:NCBI gene;Acc:418698]	1
ENSGALG00000013406	5.89486	-0.424734	-2.70717	0.0220244	0.445506	EOGT	EGF domain specific O-linked N-acetylglucosamine transferase [Source:NCBI gene;Acc:426961]	12
ENSGALG00000041202	4.99137	0.361797	2.70695	0.0220325	0.445506	FBXO32	F-box protein 32 [Source:NCBI gene;Acc:420343]	2
ENSGALG00000001774	5.75178	-0.771083	-2.70481	0.0221137	0.44581	NEO1	neogenin 1 [Source:NCBI gene;Acc:395822]	10
ENSGALG00000009722	3.74127	0.373678	2.70546	0.022089	0.44581	DYNC1I1	dynein cytoplasmic 1 intermediate chain 1 [Source:NCBI gene;Acc:420571]	2
ENSGALG00000030419	5.85152	-0.383667	-2.70309	0.0221792	0.446464	GLS2	glutaminase 2 [Source:NCBI gene;Acc:424043]	7
ENSGALG00000016545	4.15537	-0.623688	-2.70137	0.0222447	0.447114	REPS2	RALBP1 associated Eps domain containing 2 [Source:NCBI gene;Acc:418617]	1
ENSGALG00000004376	2.3708	-0.577184	-2.69761	0.022389	0.447349	KCNJ2	Potassium inwardly rectifying channel subfamily J member 2 [Source:NCBI gene;Acc:396328]	18
ENSGALG00000012586	4.66039	0.378522	2.69804	0.0223725	0.447349	GKAP1	G kinase anchoring protein 1 [Source:NCBI gene;Acc:427455]	Z
ENSGALG00000013022	-0.479724	-1.24624	-2.69819	0.0223666	0.447349	CACNA1C	calcium voltage-gated channel subunit alpha1 C [Source:NCBI gene;Acc:395891]	1
ENSGALG00000023904	7.24142	-0.757486	-2.69834	0.0223606	0.447349	FIBIN	fin bud initiation factor homolog (zebrafish) [Source:NCBI gene;Acc:426933]	5
ENSGALG00000001184	5.15942	0.35303	2.69285	0.0225726	0.447668	COQ9	coenzyme Q9 [Source:NCBI gene;Acc:415636]	11
ENSGALG00000001383	2.67797	-0.537215	-2.69241	0.0225896	0.447668	HTR4	5-hydroxytryptamine receptor 4 [Source:NCBI gene;Acc:416150]	13
ENSGALG00000006647	3.73863	-0.355873	-2.6962	0.022443	0.447668	DUSP8	dual specificity phosphatase 8 [Source:NCBI gene;Acc:770435]	5
ENSGALG00000006978	5.55929	0.333069	2.69463	0.0225038	0.447668	APOOL	apolipoprotein O like [Source:NCBI gene;Acc:422271]	4
ENSGALG00000010638	5.8824	0.329563	2.6923	0.0225941	0.447668	CASP3	caspase 3 [Source:NCBI gene;Acc:395476]	4
ENSGALG00000012761	3.82899	0.678151	2.69204	0.0226041	0.447668	DRAM1	DNA damage regulated autophagy modulator 1 [Source:NCBI gene;Acc:418095]	1
ENSGALG00000003284	6.70339	0.377738	2.69053	0.0226626	0.448168	CRLF3	cytokine receptor like factor 3 [Source:NCBI gene;Acc:417407]	18
ENSGALG00000002832	4.91592	0.68643	2.68832	0.0227488	0.448396	IFI35	interferon-induced protein 35 [Source:NCBI gene;Acc:420011]	27
ENSGALG00000013575	5.94121	1.79503	2.68683	0.0228071	0.448396	IFI6	interferon alpha inducible protein 6 [Source:NCBI gene;Acc:403120]	2
ENSGALG00000029528	7.03779	-0.388885	-2.68897	0.0227235	0.448396	KIRREL1	kin of IRRE like (Drosophila) [Source:NCBI gene;Acc:425302]	25
ENSGALG00000031597	11.301	1.20956	2.6872	0.0227925	0.448396	HBAD	hemoglobin alpha	subunit D [Source:NCBI gene;Acc:416651]	14
ENSGALG00000034251	5.48906	-0.335651	-2.68141	0.0230204	0.451503	SLC9A1	solute carrier family 9 member A1 [Source:NCBI gene;Acc:419580]	23
ENSGALG00000053130	0.876022	-0.746564	-2.68111	0.0230321	0.451503	MYOZ3	myozenin 3 [Source:NCBI gene;Acc:416271]	13
ENSGALG00000000672	4.02912	-0.369607	-2.67613	0.0232299	0.453717	SCMH1	sex comb on midleg homolog 1 (Drosophila) [Source:NCBI gene;Acc:768916]	23
ENSGALG00000002263	4.00382	0.433963	2.67418	0.0233081	0.453717	KLHL6	kelch like family member 6 [Source:NCBI gene;Acc:424762]	9
ENSGALG00000005346	8.42203	-0.784216	-2.67153	0.0234142	0.453717	PPIC	peptidylprolyl isomerase C [Source:NCBI gene;Acc:768427]	Z
ENSGALG00000006877	3.99101	0.370805	2.67318	0.023348	0.453717	KLHL4	kelch like family member 4 [Source:NCBI gene;Acc:422265]	4
ENSGALG00000010954	5.34694	0.354755	2.67715	0.0231896	0.453717	MALSU1	mitochondrial assembly of ribosomal large subunit 1 [Source:NCBI gene;Acc:420616]	2
ENSGALG00000025881	3.03812	0.584929	2.67181	0.0234031	0.453717		colony stimulating factor 2 receptor beta common subunit [Source:NCBI gene;Acc:101750812]	1
ENSGALG00000028807	5.35238	0.440821	2.67235	0.0233812	0.453717	AP1AR	adaptor related protein complex 1 associated regulatory protein [Source:NCBI gene;Acc:422693]	4
ENSGALG00000036093	4.18273	0.603173	2.67212	0.0233908	0.453717	PTPN7	protein tyrosine phosphatase	non-receptor type 7 [Source:NCBI gene;Acc:770905]	26
ENSGALG00000012338	6.17622	0.676327	2.67037	0.0234611	0.453975	BDH2	3-hydroxybutyrate dehydrogenase	type 2 [Source:NCBI gene;Acc:422715]	4
ENSGALG00000027483	5.33956	0.823486	2.66657	0.0236146	0.455636	GLRX	glutaredoxin [Source:NCBI gene;Acc:396069]	Z
ENSGALG00000032558	4.94562	0.728401	2.66703	0.0235961	0.455636	INSC	inscuteable homolog (Drosophila) [Source:NCBI gene;Acc:423067]	5
ENSGALG00000040157	5.27604	0.311	2.66493	0.0236813	0.456271	CHTF18	chromosome transmission fidelity factor 18 [Source:NCBI gene;Acc:416531]	14
ENSGALG00000014722	2.12753	0.701058	2.66218	0.0237933	0.457776		C-type lectin-like receptor variant [Source:NCBI gene;Acc:769174]	1
ENSGALG00000000141	6.73983	0.545769	2.65963	0.0238975	0.458076	BLB1	Major histocompatibility complex class II beta chain BLB1 [Source:NCBI gene;Acc:693256]	16
ENSGALG00000009963	1.25909	1.40338	2.66042	0.0238654	0.458076	LYZ	lysozyme (renal amyloidosis) [Source:NCBI gene;Acc:396218]	1
ENSGALG00000011079	6.78645	0.422361	2.65931	0.0239108	0.458076	GLRX5	glutaredoxin 5 [Source:NCBI gene;Acc:423440]	5
ENSGALG00000005024	0.766793	-0.92428	-2.65607	0.0240444	0.458679		EF-hand and coiled-coil domain containing 1 [Source:NCBI gene;Acc:415972]	12
ENSGALG00000016861	5.94776	0.28691	2.65656	0.024024	0.458679	BIVM	basic	immunoglobulin-like variable motif containing [Source:NCBI gene;Acc:374099]	1
ENSGALG00000044020	4.13703	-0.409196	-2.65714	0.0240002	0.458679			1
ENSGALG00000002709	6.97841	-0.385126	-2.65352	0.0241499	0.4592	MYO1C	myosin IC [Source:NCBI gene;Acc:417555]	19
ENSGALG00000031397	5.79362	0.554269	2.6536	0.0241466	0.4592	NT5C3A	5'-nucleotidase	cytosolic IIIA [Source:NCBI gene;Acc:395080]	2
ENSGALG00000051766	4.0462	0.826225	2.65294	0.0241738	0.4592			11
ENSGALG00000046781	0.72661	-0.63448	-2.65058	0.0242718	0.460011			3
ENSGALG00000052290	-0.0548881	0.810646	2.65027	0.0242847	0.460011			5
ENSGALG00000011442	4.834	-0.347593	-2.64558	0.024481	0.462543	TGFBR2	transforming growth factor beta receptor 2 [Source:NCBI gene;Acc:396399]	2
ENSGALG00000038141	3.27893	0.899929	2.64544	0.0244869	0.462543	NCF4	neutrophil cytosolic factor 4 [Source:NCBI gene;Acc:418052]	1
ENSGALG00000000608	1.72217	-0.815074	-2.58813	0.0270187	0.463014	CDH1	cadherin 1 [Source:NCBI gene;Acc:415860]	11
ENSGALG00000001595	3.85572	-0.48533	-2.59628	0.0266433	0.463014	PHF19	PHD finger protein 19 [Source:NCBI gene;Acc:772213]	17
ENSGALG00000001607	5.96821	0.377305	2.6152	0.0257921	0.463014	CYBC1	chromosome 18 C17orf62 homolog [Source:NCBI gene;Acc:417342]	18
ENSGALG00000002763	9.11434	-0.876285	-2.59328	0.0267811	0.463014	FRZB	frizzled related protein [Source:NCBI gene;Acc:395545]	7
ENSGALG00000003146	1.76133	-0.586259	-2.58843	0.0270048	0.463014	CCDC92	coiled-coil domain containing 92 [Source:NCBI gene;Acc:416817]	15
ENSGALG00000003282	6.74073	0.490004	2.61697	0.025714	0.463014	STAT5A	signal transducer and activator of transcription 5A [Source:NCBI gene;Acc:395556]	27
ENSGALG00000003642	4.74377	0.416505	2.62199	0.025493	0.463014	PDGFA	platelet derived growth factor subunit A [Source:NCBI gene;Acc:374196]	14
ENSGALG00000003966	9.78124	0.484242	2.62451	0.025383	0.463014	RPL23A	ribosomal protein L23a [Source:NCBI gene;Acc:417574]	19
ENSGALG00000004059	3.00677	-0.598718	-2.59198	0.0268408	0.463014	LRRC49	leucine rich repeat containing 49 [Source:NCBI gene;Acc:415393]	10
ENSGALG00000004793	3.43332	-0.556875	-2.58775	0.0270364	0.463014			19
ENSGALG00000004806	5.50078	-0.440467	-2.64203	0.0246311	0.463014	EDEM3	ER degradation enhancing alpha-mannosidase like protein 3 [Source:NCBI gene;Acc:424450]	8
ENSGALG00000005022	2.63662	0.667548	2.59109	0.0268819	0.463014	GP9	glycoprotein IX platelet [Source:HGNC Symbol;Acc:HGNC:4444]	12
ENSGALG00000005474	1.30644	0.758464	2.59342	0.0267745	0.463014	PNAT10	N-acetyltransferase	pineal gland isozyme NAT-10 [Source:NCBI gene;Acc:396283]	11
ENSGALG00000005678	8.94158	-0.419516	-2.6204	0.0255627	0.463014	FLNB	filamin B [Source:NCBI gene;Acc:378913]	12
ENSGALG00000005704	6.03909	0.273212	2.61417	0.0258377	0.463014	NDUFB8	NADH:ubiquinone oxidoreductase subunit B8 [Source:NCBI gene;Acc:423763]	6
ENSGALG00000005845	6.33875	-0.511275	-2.58484	0.0271718	0.463014	SLC7A5	solute carrier family 7 member 5 [Source:NCBI gene;Acc:415832]	11
ENSGALG00000005849	5.64368	0.429231	2.58372	0.027224	0.463014	PPDPF	pancreatic progenitor cell differentiation and proliferation factor [Source:NCBI gene;Acc:419245]	20
ENSGALG00000006019	3.00525	0.81609	2.59615	0.0266497	0.463014	EPHX4	epoxide hydrolase 3 [Source:NCBI gene;Acc:424505]	8
ENSGALG00000006482	-0.17101	-1.57618	-2.61587	0.0257623	0.463014	FAH	fumarylacetoacetate hydrolase [Source:NCBI gene;Acc:415482]	10
ENSGALG00000006808	5.74278	-0.320699	-2.61127	0.0259669	0.463014	TSPAN6	tetraspanin 6 [Source:NCBI gene;Acc:422262]	4
ENSGALG00000007079	4.19328	-0.649884	-2.64007	0.024714	0.463014	PAPPA	pappalysin 1 [Source:NCBI gene;Acc:417245]	17
ENSGALG00000007483	1.90078	-0.612228	-2.60772	0.0261254	0.463014	LRIG1	leucine rich repeats and immunoglobulin like domains 1 [Source:NCBI gene;Acc:427592]	12
ENSGALG00000007768	5.32121	0.420876	2.61924	0.0256138	0.463014	AURKA	aurora kinase B [Source:NCBI gene;Acc:428167]	20
ENSGALG00000008007	5.56379	-0.676403	-2.60372	0.0263054	0.463014	ITGA11	integrin subunit alpha 11 [Source:NCBI gene;Acc:415560]	10
ENSGALG00000009149	5.90976	0.405797	2.63483	0.0249371	0.463014		FKBP prolyl isomerase 7 [Source:HGNC Symbol;Acc:HGNC:3723]	7
ENSGALG00000009264	6.13417	0.296996	2.62471	0.0253746	0.463014	MTX2	metaxin 2 [Source:NCBI gene;Acc:424138]	7
ENSGALG00000009567	3.3185	-0.536273	-2.63954	0.0247365	0.463014	TLL1	tolloid like 1 [Source:NCBI gene;Acc:395441]	4
ENSGALG00000010083	5.12135	-0.581713	-2.60583	0.0262101	0.463014	ST3GAL3	ST3 beta-galactoside alpha-2	3-sialyltransferase 3 [Source:NCBI gene;Acc:424572]	8
ENSGALG00000010464	6.36634	0.298057	2.59632	0.0266416	0.463014	GLRX3	glutaredoxin 3 [Source:NCBI gene;Acc:423968]	6
ENSGALG00000010642	5.46553	0.42523	2.63073	0.0251133	0.463014	IRF2	interferon regulatory factor 2 [Source:NCBI gene;Acc:396115]	4
ENSGALG00000011361	4.54683	-0.560409	-2.5947	0.0267161	0.463014	CRYZ	crystallin zeta [Source:NCBI gene;Acc:772289]	8
ENSGALG00000011504	7.19674	0.29909	2.58379	0.027221	0.463014	TMPO	thymopoietin [Source:NCBI gene;Acc:417923]	1
ENSGALG00000011544	2.44683	1.1374	2.64116	0.0246678	0.463014	BCL2L14	BCL2 like 14 [Source:NCBI gene;Acc:419096]	1
ENSGALG00000012075	5.39416	0.785765	2.5888	0.0269876	0.463014	DTX3L	deltex E3 ubiquitin ligase 3L [Source:NCBI gene;Acc:424267]	7
ENSGALG00000013225	4.79527	-0.66404	-2.6216	0.0255102	0.463014	VAT1L	vesicle amine transport 1 like [Source:NCBI gene;Acc:430410]	11
ENSGALG00000013722	4.07729	-1.43572	-2.61297	0.025891	0.463014	SEMA3B	semaphorin 3B [Source:NCBI gene;Acc:426234]	12
ENSGALG00000014528	3.00324	-1.02629	-2.58475	0.0271761	0.463014	ENO2	enolase 2 [Source:NCBI gene;Acc:395689]	1
ENSGALG00000014930	4.05794	-0.429789	-2.6133	0.0258765	0.463014	ENC1	ectodermal-neural cortex 1 [Source:NCBI gene;Acc:427203]	Z
ENSGALG00000015080	-0.666481	1.59292	2.58804	0.0270231	0.463014	SLC24A2	solute carrier family 24 member 2 [Source:NCBI gene;Acc:414891]	Z
ENSGALG00000015183	5.43814	0.616064	2.62199	0.0254932	0.463014		Ras-related protein Rab-10-like [Source:NCBI gene;Acc:421099]	2
ENSGALG00000016281	4.43502	-0.967396	-2.64031	0.0247036	0.463014	DMD	dystrophin [Source:NCBI gene;Acc:396236]	1
ENSGALG00000016440	4.25596	-0.341993	-2.62434	0.0253904	0.463014	KLF11	Kruppel like factor 11 [Source:NCBI gene;Acc:421934]	3
ENSGALG00000016459	0.278157	-0.840993	-2.61265	0.0259054	0.463014	LRATD1	family with sequence similarity 84 member A [Source:NCBI gene;Acc:421946]	3
ENSGALG00000016464	1.91799	1.28487	2.59789	0.0265701	0.463014	VSNL1	visinin like 1 [Source:NCBI gene;Acc:396189]	3
ENSGALG00000016767	4.46369	-0.713025	-2.60294	0.0263407	0.463014	AFF3	AF4/FMR2 family member 3 [Source:NCBI gene;Acc:418705]	1
ENSGALG00000016843	7.34406	-0.401171	-2.60511	0.0262426	0.463014	COL4A2	collagen type IV alpha 2 chain [Source:NCBI gene;Acc:418752]	1
ENSGALG00000017644	8.24633	0.467607	2.6125	0.025912	0.463014	COTL1	coactosin like F-actin binding protein 1 [Source:NCBI gene;Acc:768420]	11
ENSGALG00000018335	-0.418811	0.873593	2.60629	0.0261896	0.463014	gga-mir-199-2	gga-mir-199-2 [Source:miRBase;Acc:MI0001220]	8
ENSGALG00000019233	6.21321	0.85624	2.59488	0.0267075	0.463014		phospholipase A2 group X-like [Source:NCBI gene;Acc:418356]	1
ENSGALG00000021304	0.410574	-0.828258	-2.59213	0.0268342	0.463014	RANBP3L	RAN binding protein 3 like [Source:NCBI gene;Acc:770629]	Z
ENSGALG00000023670	0.0443283	-1.14411	-2.63446	0.0249532	0.463014	NAALADL2	N-acetylated alpha-linked acidic dipeptidase like 2 [Source:NCBI gene;Acc:429156]	9
ENSGALG00000023844	2.13884	0.865159	2.59904	0.0265178	0.463014		WNT1 inducible signaling pathway protein 2 [Source:NCBI gene;Acc:419192]	20
ENSGALG00000026468	6.52634	-0.41993	-2.61476	0.0258115	0.463014	CHSY1	chondroitin sulfate synthase 1 [Source:NCBI gene;Acc:415521]	10
ENSGALG00000028975	-0.48699	-1.28474	-2.6246	0.0253792	0.463014		FERM and PDZ domain containing 3 [Source:NCBI gene;Acc:428699]	4
ENSGALG00000029669	5.15673	0.646884	2.58649	0.0270947	0.463014	C1QC	complement C1q C chain [Source:NCBI gene;Acc:419503]	21
ENSGALG00000032465	6.88	0.534281	2.62492	0.0253651	0.463014	ATP8	ATP synthase F0 subunit 8 [Source:NCBI gene;Acc:39116937]	MT
ENSGALG00000033051	2.69914	-0.671508	-2.59554	0.0266775	0.463014	CAMK1D	calcium/calmodulin dependent protein kinase ID [Source:NCBI gene;Acc:425522]	1
ENSGALG00000033867	7.32338	-0.588967	-2.63719	0.0248364	0.463014	PCOLCE	procollagen C-endopeptidase enhancer [Source:HGNC Symbol;Acc:HGNC:8738]	30
ENSGALG00000034168	2.36526	-0.872371	-2.60471	0.0262608	0.463014	WNT5A	Wnt family member 5A [Source:NCBI gene;Acc:395703]	12
ENSGALG00000034967	4.07755	-0.310571	-2.62395	0.0254075	0.463014	GDPD5	glycerophosphodiester phosphodiesterase domain containing 5 [Source:NCBI gene;Acc:419070]	1
ENSGALG00000035717	9.39992	-0.86772	-2.6203	0.0255671	0.463014	HSPG2	heparan sulfate proteoglycan 2 [Source:NCBI gene;Acc:429806]	21
ENSGALG00000037131	0.0286178	-0.968186	-2.59701	0.0266101	0.463014		voltage-dependent P/Q-type calcium channel subunit alpha-1A-like [Source:NCBI gene;Acc:107049790]	30
ENSGALG00000037682	4.59838	-0.3627	-2.60626	0.0261911	0.463014	CCSER2	coiled-coil serine rich protein 2 [Source:NCBI gene;Acc:423606]	6
ENSGALG00000038515	7.06684	0.491189	2.62398	0.0254064	0.463014	LFNG	LFNG O-fucosylpeptide 3-beta-N-acetylglucosaminyltransferase [Source:NCBI gene;Acc:395790]	14
ENSGALG00000039818	6.97944	-0.335212	-2.61272	0.0259021	0.463014	GLG1	golgi glycoprotein 1 [Source:NCBI gene;Acc:396492]	11
ENSGALG00000039978	8.40124	1.19434	2.58456	0.0271849	0.463014	SLC4A1	solute carrier family 4 member 1 (Diego blood group) [Source:NCBI gene;Acc:396532]	27
ENSGALG00000040758	5.20447	-0.361381	-2.60001	0.0264734	0.463014	INSR	insulin receptor [Source:NCBI gene;Acc:420133]	28
ENSGALG00000041401	6.42536	0.263068	2.61674	0.025724	0.463014	SDHB	succinate dehydrogenase complex iron sulfur subunit B [Source:NCBI gene;Acc:100859720]	21
ENSGALG00000041461	1.43179	0.850549	2.59553	0.0266776	0.463014	DNMT3B	DNA methyltransferase 3 beta [Source:NCBI gene;Acc:419287]	20
ENSGALG00000046187	6.11246	0.729581	2.62838	0.0252152	0.463014	PARP12	poly(ADP-ribose) polymerase family member 12 [Source:NCBI gene;Acc:418100]	1
ENSGALG00000046192	2.91096	1.49121	2.59732	0.0265958	0.463014		c-C motif chemokine 26-like [Source:NCBI gene;Acc:100857191]	Z
ENSGALG00000047061	-0.437687	-1.26016	-2.61252	0.0259112	0.463014			5
ENSGALG00000048048	0.291037	-1.81457	-2.62019	0.0255721	0.463014		mucin 4	cell surface associated [Source:NCBI gene;Acc:101752124]	9
ENSGALG00000048523	-0.965469	1.54053	2.60877	0.0260786	0.463014			4
ENSGALG00000048671	5.07166	1.30484	2.61462	0.025818	0.463014		E3 ubiquitin/ISG15 ligase TRIM25-like [Source:NCBI gene;Acc:416147]	13
ENSGALG00000049218	2.18673	0.513072	2.6347	0.0249428	0.463014	DYX1C1	dyslexia susceptibility 1 candidate 1 [Source:NCBI gene;Acc:415409]	10
ENSGALG00000049390	4.21477	-1.48797	-2.61585	0.0257632	0.463014			22
ENSGALG00000049587	3.87907	-0.429268	-2.60847	0.0260917	0.463014			2
ENSGALG00000049613	-0.00649456	-0.844761	-2.60821	0.0261032	0.463014			14
ENSGALG00000030008	5.28688	0.318012	2.5828	0.0272672	0.463164	HHEX	hematopoietically expressed homeobox [Source:NCBI gene;Acc:396182]	6
ENSGALG00000000824	1.85498	0.923178	2.57822	0.0274825	0.463222		myosin light chain kinase	smooth muscle-like [Source:NCBI gene;Acc:428278]	27
ENSGALG00000001480	0.492781	-0.993882	-2.5789	0.0274501	0.463222	INKA2	family with sequence similarity 212	member B [Source:NCBI gene;Acc:419868]	26
ENSGALG00000007248	5.19654	-0.405341	-2.57883	0.0274537	0.463222		pleckstrin homology domain containing O2 [Source:NCBI gene;Acc:769198]	10
ENSGALG00000015112	6.04321	-0.321862	-2.58196	0.0273064	0.463222	ZNF521	zinc finger protein 521 [Source:NCBI gene;Acc:421083]	2
ENSGALG00000032701	3.7398	0.804011	2.5799	0.0274033	0.463222	LY96	lymphocyte antigen 96 [Source:NCBI gene;Acc:420189]	2
ENSGALG00000035879	2.65958	-0.472072	-2.5779	0.0274972	0.463222	ITGA7	integrin subunit alpha 7 [Source:NCBI gene;Acc:101749098]	33
ENSGALG00000052425	1.96389	0.960844	2.57761	0.027511	0.463222	BATF3	basic leucine zipper ATF-like transcription factor 3 [Source:NCBI gene;Acc:421368]	3
ENSGALG00000012017	5.4405	-0.578367	-2.57537	0.0276169	0.463503	DAAM1	dishevelled associated activator of morphogenesis 1 [Source:NCBI gene;Acc:423532]	5
ENSGALG00000012187	5.40293	-0.546029	-2.57581	0.0275961	0.463503	MGAT5	alpha-1	6-mannosylglycoprotein 6-beta-N-acetylglucosaminyltransferase [Source:NCBI gene;Acc:424286]	7
ENSGALG00000016774	2.92949	-0.675833	-2.57508	0.0276308	0.463503	NPAS2	neuronal PAS domain protein 2 [Source:NCBI gene;Acc:395433]	1
ENSGALG00000004170	5.5338	0.78746	2.57418	0.0276734	0.463641	ADA	adenosine deaminase [Source:NCBI gene;Acc:419194]	20
ENSGALG00000002631	4.03035	-0.450958	-2.5713	0.0278106	0.464786	LRRC75A	leucine rich repeat containing 75A [Source:NCBI gene;Acc:417550]	19
ENSGALG00000006819	-0.636095	1.77082	2.57192	0.0277812	0.464786	AGBL1	ATP/GTP binding protein like 1 [Source:NCBI gene;Acc:427507]	10
ENSGALG00000003313	4.78494	0.310762	2.56905	0.0279181	0.465529		myotubularin related protein 9-like	pseudogene [Source:NCBI gene;Acc:419652]	23
ENSGALG00000013239	3.56972	-0.653224	-2.56853	0.0279431	0.465529			25
ENSGALG00000014466	-0.219441	-0.81781	-2.56821	0.0279586	0.465529	PIANP	PILR alpha associated neural protein [Source:NCBI gene;Acc:418282]	1
ENSGALG00000003433	4.44769	0.863872	2.56661	0.0280354	0.466231	DPEP2	dipeptidase 2-like [Source:NCBI gene;Acc:107054267]	11
ENSGALG00000008465	0.136128	-1.5977	-2.56365	0.0281779	0.466301	SORCS1	sortilin related VPS10 domain containing receptor 1 [Source:NCBI gene;Acc:423885]	6
ENSGALG00000032440	7.96354	0.450608	2.56435	0.0281441	0.466301	QPCT	glutaminyl-peptide cyclotransferase [Source:NCBI gene;Acc:421479]	3
ENSGALG00000046226	3.12405	-0.76537	-2.5646	0.0281322	0.466301	SCARB1	scavenger receptor class B member 1 [Source:NCBI gene;Acc:416814]	15
ENSGALG00000051905	0.563469	1.00565	2.56558	0.028085	0.466301		protein phosphatase 1 regulatory inhibitor subunit 14D [Source:NCBI gene;Acc:423205]	5
ENSGALG00000009870	6.40823	0.918325	2.56164	0.0282752	0.467337	IL15	interleukin 15 [Source:NCBI gene;Acc:395258]	4
ENSGALG00000000253	4.64994	0.433216	2.55933	0.0283879	0.467932	SLC25A46	solute carrier family 25 member 46 [Source:NCBI gene;Acc:415610]	Z
ENSGALG00000002167	3.21534	0.425676	2.54484	0.0291022	0.467932	PATL2	PAT1 homolog 2 [Source:NCBI gene;Acc:415327]	10
ENSGALG00000003539	2.86782	-0.511521	-2.55454	0.028622	0.467932	KIAA1522	KIAA1522 [Source:NCBI gene;Acc:419665]	23
ENSGALG00000007565	4.04446	-0.427239	-2.5447	0.0291091	0.467932	PPP2R2B	protein phosphatase 2 regulatory subunit Bbeta [Source:NCBI gene;Acc:416350]	13
ENSGALG00000009730	3.76507	-0.948407	-2.5504	0.0288258	0.467932	SLC38A4	solute carrier family 38 member 4 [Source:NCBI gene;Acc:417809]	1
ENSGALG00000009885	4.95675	0.31113	2.54872	0.0289093	0.467932	HELB	DNA helicase B [Source:NCBI gene;Acc:417836]	1
ENSGALG00000010001	1.82161	-0.85565	-2.55224	0.0287352	0.467932	EGLN3	egl-9 family hypoxia inducible factor 3 [Source:NCBI gene;Acc:423316]	5
ENSGALG00000010761	4.93121	0.277121	2.55983	0.0283635	0.467932	MRPL37	mitochondrial ribosomal protein L37 [Source:NCBI gene;Acc:772313]	8
ENSGALG00000010798	4.42422	-0.403834	-2.54724	0.0289827	0.467932	DHCR24	24-dehydrocholesterol reductase [Source:NCBI gene;Acc:424661]	8
ENSGALG00000011801	-0.533007	-0.763415	-2.55753	0.0284756	0.467932	ESR2	estrogen receptor 2 [Source:NCBI gene;Acc:395575]	5
ENSGALG00000012061	2.07953	0.987531	2.55628	0.0285368	0.467932		glycerol-3-phosphate dehydrogenase 1-like 2 [Source:NCBI gene;Acc:424263]	7
ENSGALG00000016890	5.09682	-0.41006	-2.55688	0.0285073	0.467932	MBNL2	muscleblind like splicing regulator 2 [Source:NCBI gene;Acc:418784]	1
ENSGALG00000019060	3.38428	-1.63404	-2.54949	0.0288708	0.467932	MMP27	matrix metallopeptidase 27 [Source:NCBI gene;Acc:395850]	1
ENSGALG00000019843	3.63363	1.04169	2.5497	0.0288604	0.467932	AvBD4	avian beta-defensin 4 [Source:NCBI gene;Acc:414342]	3
ENSGALG00000025886	4.24505	0.409076	2.5547	0.028614	0.467932	SUSD3	sushi domain containing 3 [Source:NCBI gene;Acc:415988]	12
ENSGALG00000027188	5.4715	-0.757648	-2.54668	0.0290104	0.467932	SREBF1	sterol regulatory element binding transcription factor 1 [Source:NCBI gene;Acc:373915]	14
ENSGALG00000027265	0.0816459	-0.848308	-2.55238	0.0287283	0.467932	AJAP1	adherens junctions associated protein 1 [Source:HGNC Symbol;Acc:HGNC:30801]	21
ENSGALG00000031929	3.6699	-0.449403	-2.54517	0.0290855	0.467932		potassium calcium-activated channel subfamily M regulatory beta subunit 2 [Source:NCBI gene;Acc:770907]	9
ENSGALG00000037558	5.22012	0.331	2.55425	0.0286361	0.467932		myocyte enhancer factor 2B [Source:NCBI gene;Acc:426373]	28
ENSGALG00000041898	6.07878	0.323493	2.54528	0.0290804	0.467932	FAM43A	family with sequence similarity 43 member A [Source:NCBI gene;Acc:429145]	9
ENSGALG00000047979	4.36337	-0.413991	-2.55735	0.0284842	0.467932	EBF4	transcription factor COE1-like [Source:NCBI gene;Acc:107050199]	4
ENSGALG00000049279	3.33779	0.950631	2.5449	0.029099	0.467932			5
ENSGALG00000049851	3.01808	-0.78726	-2.5448	0.0291044	0.467932			8
ENSGALG00000003726	4.38765	-0.385199	-2.53936	0.0293768	0.468008	EGFLAM	EGF like	fibronectin type III and laminin G domains [Source:NCBI gene;Acc:427445]	Z
ENSGALG00000009491	3.13592	0.572574	2.53871	0.0294099	0.468008	RAD51B	RAD51 paralog B [Source:NCBI gene;Acc:769071]	5
ENSGALG00000011299	2.91433	0.679815	2.5401	0.0293396	0.468008	KIF25	kinesin family member 25 [Source:NCBI gene;Acc:421563]	3
ENSGALG00000013427	1.66077	-0.985795	-2.54029	0.0293303	0.468008	SORBS2	sorbin and SH3 domain containing 2 [Source:NCBI gene;Acc:422719]	4
ENSGALG00000013968	6.29444	-0.319751	-2.53942	0.0293741	0.468008	SGCB	sarcoglycan beta [Source:NCBI gene;Acc:422760]	4
ENSGALG00000014897	4.95565	0.417628	2.54277	0.0292057	0.468008		thymidylate synthetase [Source:NCBI gene;Acc:421060]	2
ENSGALG00000015077	6.07338	-0.485997	-2.53866	0.0294122	0.468008	ARHGAP31	Rho GTPase activating protein 31 [Source:HGNC Symbol;Acc:HGNC:29216]	1
ENSGALG00000045740	2.94988	1.15119	2.53903	0.0293939	0.468008		hemogen [Source:NCBI gene;Acc:427378]	Z
ENSGALG00000050805	5.21861	-0.539122	-2.53838	0.0294262	0.468008		leucine-rich repeat and calponin homology domain-containing protein 2-like [Source:NCBI gene;Acc:107050626]	30
ENSGALG00000027778	3.6245	0.670467	2.53633	0.0295303	0.468473		ras-related and estrogen-regulated growth inhibitor-like [Source:NCBI gene;Acc:770492]	5
ENSGALG00000048873	2.96402	-0.666765	-2.53691	0.0295007	0.468473	C3orf14	chromosome 12 C3orf14 homolog [Source:NCBI gene;Acc:416073]	12
ENSGALG00000053321	2.85606	0.504721	2.53575	0.0295596	0.468473	DOK2	docking protein 2 [Source:NCBI gene;Acc:100857332]	22
ENSGALG00000002294	3.64218	-0.436292	-2.52459	0.0301308	0.469972	SEMA6A	semaphorin 6A [Source:NCBI gene;Acc:427387]	Z
ENSGALG00000004161	6.35773	0.330596	2.52181	0.0302748	0.469972	CCNB1	cyclin B1 [Source:NCBI gene;Acc:415400]	10
ENSGALG00000004257	2.20371	-1.31213	-2.52163	0.030284	0.469972	TSPAN15	tetraspanin 15 [Source:NCBI gene;Acc:423699]	6
ENSGALG00000004418	1.48079	1.36819	2.51925	0.0304077	0.469972	SSTR2	somatostatin receptor 2 [Source:NCBI gene;Acc:395305]	18
ENSGALG00000005323	-0.589277	1.1557	2.52251	0.0302384	0.469972	DIRAS2	DIRAS family GTPase 2 [Source:NCBI gene;Acc:425241]	Z
ENSGALG00000008313	3.31528	-0.319401	-2.51904	0.0304186	0.469972	NAPB	NSF attachment protein beta [Source:NCBI gene;Acc:421231]	3
ENSGALG00000009346	6.92137	0.270553	2.51826	0.0304592	0.469972	HN1L	hematological and neurological expressed 1 like [Source:NCBI gene;Acc:416763]	14
ENSGALG00000010029	3.41578	0.700597	2.52979	0.0298633	0.469972	BEST3	bestrophin 3 [Source:NCBI gene;Acc:417849]	1
ENSGALG00000010925	6.59055	0.317923	2.5177	0.0304887	0.469972	FAM126A	family with sequence similarity 126 member A [Source:NCBI gene;Acc:420611]	2
ENSGALG00000010960	4.9042	0.325821	2.52244	0.0302421	0.469972	GALNT3	polypeptide N-acetylgalactosaminyltransferase 3 [Source:NCBI gene;Acc:424177]	7
ENSGALG00000010963	3.90049	0.431882	2.51901	0.0304204	0.469972		estradiol 17-beta-dehydrogenase 11-like [Source:NCBI gene;Acc:428754]	4
ENSGALG00000011094	4.48242	-0.287703	-2.51914	0.0304136	0.469972	PDE4B	phosphodiesterase 4B [Source:NCBI gene;Acc:424700]	8
ENSGALG00000011483	5.538	0.514793	2.52584	0.0300663	0.469972	MPC1L	mitochondrial pyruvate carrier 1-like [Source:NCBI gene;Acc:428592]	3
ENSGALG00000012119	5.1854	1.08478	2.51602	0.0305764	0.469972	MARCO	macrophage receptor with collagenous structure [Source:NCBI gene;Acc:395488]	7
ENSGALG00000015849	5.5571	-0.936898	-2.53116	0.0297933	0.469972	ME1	malic enzyme 1 [Source:NCBI gene;Acc:374189]	3
ENSGALG00000016810	3.27082	-0.596403	-2.51567	0.030595	0.469972	SH3RF3	SH3 domain containing ring finger 3 [Source:NCBI gene;Acc:418731]	1
ENSGALG00000017274	2.35093	-1.22866	-2.51653	0.03055	0.469972	CD9	CD9 molecule [Source:NCBI gene;Acc:395527]	1
ENSGALG00000021143	5.81095	0.480367	2.52394	0.0301642	0.469972	RGS18	regulator of G-protein signaling 18 [Source:NCBI gene;Acc:424361]	8
ENSGALG00000027198	5.39163	-0.672271	-2.52084	0.0303251	0.469972	TMEM47	transmembrane protein 47 [Source:NCBI gene;Acc:418585]	1
ENSGALG00000033178	5.85669	-0.268245	-2.52007	0.030365	0.469972	KLF6	Kruppel like factor 6 [Source:NCBI gene;Acc:420463]	2
ENSGALG00000034586	2.78944	-0.471252	-2.51747	0.0305008	0.469972			2
ENSGALG00000035184	5.49537	-0.577804	-2.53148	0.0297765	0.469972	SDC3	syndecan 3 [Source:NCBI gene;Acc:396343]	23
ENSGALG00000036309	5.10497	0.441356	2.51731	0.0305091	0.469972	LARS2	leucyl-tRNA synthetase 2	mitochondrial [Source:NCBI gene;Acc:420702]	2
ENSGALG00000037533	1.37446	1.15852	2.52304	0.0302106	0.469972			2
ENSGALG00000042505	2.20135	-0.570136	-2.51737	0.0305061	0.469972	DSEL	dermatan sulfate epimerase like [Source:NCBI gene;Acc:421028]	2
ENSGALG00000043399	5.64913	0.295391	2.52367	0.0301784	0.469972	EZH2	enhancer of zeste 2 polycomb repressive complex 2 subunit [Source:NCBI gene;Acc:420784]	2
ENSGALG00000054033	0.212525	2.04211	2.51942	0.0303987	0.469972			5
ENSGALG00000001558	4.88763	0.856162	2.50972	0.0309089	0.470671	MOV10	Mov10 RISC complex RNA helicase [Source:NCBI gene;Acc:419872]	26
ENSGALG00000001826	3.23402	-0.462249	-2.50754	0.0310244	0.470671	WWC1	WW and C2 domain containing 1 [Source:NCBI gene;Acc:416167]	13
ENSGALG00000003933	6.13442	-0.418167	-2.50777	0.031012	0.470671	QSOX1	quiescin Q6 sulfhydryl oxidase 1 [Source:NCBI gene;Acc:373914]	8
ENSGALG00000016823	6.28386	0.372612	2.5087	0.0309625	0.470671	TFDP1	transcription factor Dp family member 3 [Source:NCBI gene;Acc:418739]	1
ENSGALG00000039173	1.13677	-0.697008	-2.50966	0.0309116	0.470671	RGMA	repulsive guidance molecule family member a [Source:NCBI gene;Acc:395214]	10
ENSGALG00000041120	3.07085	-0.608468	-2.51028	0.0308788	0.470671	METTL24	methyltransferase like 24 [Source:NCBI gene;Acc:421758]	3
ENSGALG00000041643	5.40845	-0.485004	-2.50949	0.0309208	0.470671	NFIC	nuclear factor I C [Source:NCBI gene;Acc:396208]	28
ENSGALG00000042853	4.96305	0.419056	2.5106	0.0308622	0.470671	GGPS1	geranylgeranyl diphosphate synthase 1 [Source:NCBI gene;Acc:427092]	3
ENSGALG00000045534	2.90634	0.98322	2.50986	0.0309011	0.470671		promyelocytic leukemia-like [Source:NCBI gene;Acc:100857563]	10
ENSGALG00000049487	0.716866	0.963019	2.51032	0.0308766	0.470671	KCNK15	potassium two pore domain channel subfamily K member 15 [Source:NCBI gene;Acc:419191]	20
ENSGALG00000050490	6.19548	-1.21339	-2.51273	0.0307495	0.470671			16
ENSGALG00000010741	0.159688	-1.15362	-2.50572	0.0311212	0.471608	MAP1LC3C	microtubule associated protein 1 light chain 3 gamma [Source:NCBI gene;Acc:421504]	3
ENSGALG00000001472	6.06119	-0.455558	-2.50434	0.0311952	0.47167	JAM3	junctional adhesion molecule 3 [Source:NCBI gene;Acc:419736]	24
ENSGALG00000011296	0.130475	-0.824945	-2.50436	0.0311938	0.47167		FERM domain containing 1 [Source:NCBI gene;Acc:421562]	3
ENSGALG00000005840	5.53938	-0.467104	-2.50358	0.0312357	0.471754	DENND5A	DENN domain containing 5A [Source:NCBI gene;Acc:423048]	5
ENSGALG00000009280	1.7572	-0.740478	-2.50267	0.0312844	0.471961	NPY2R	neuropeptide Y receptor Y2 [Source:NCBI gene;Acc:422405]	4
ENSGALG00000052470	0.305845	1.0153	2.50189	0.0313262	0.472064			10
ENSGALG00000046995	1.93265	-0.588052	-2.4985	0.0315091	0.474289	NECTIN4	poliovirus receptor-related protein 4-like [Source:NCBI gene;Acc:101750739]	25
ENSGALG00000003203	1.50169	-0.543478	-2.49498	0.0316997	0.474716			12
ENSGALG00000007564	2.98803	-0.513687	-2.49575	0.0316574	0.474716		UPF0061 protein xcc-b100_1894-like [Source:NCBI gene;Acc:420491]	2
ENSGALG00000012056	3.35389	0.73254	2.49258	0.0318303	0.474716	GRAP2	GRB2-related adaptor protein 2 [Source:NCBI gene;Acc:770756]	1
ENSGALG00000015902	2.19471	0.619126	2.49214	0.0318542	0.474716	CD8BP	CD8b molecule pseudogene [Source:NCBI gene;Acc:396175]	4
ENSGALG00000026422	5.04109	0.492165	2.49589	0.0316502	0.474716		poly(ADP-ribose) polymerase family member 14 [Source:NCBI gene;Acc:101747378]	7
ENSGALG00000032717	0.209138	0.910221	2.49423	0.03174	0.474716	CCL4	chemokine (C-C motif) ligand 4 [Source:NCBI gene;Acc:395551]	19
ENSGALG00000050133	0.701453	-0.858978	-2.4933	0.0317906	0.474716			1
ENSGALG00000053451	0.4615	-0.703679	-2.49516	0.0316899	0.474716			Z
ENSGALG00000054443	5.41133	0.738033	2.49373	0.0317675	0.474716		uncharacterized LOC101751423 [Source:NCBI gene;Acc:101751423]	KZ626834.1
ENSGALG00000005439	5.55752	-0.384823	-2.491	0.0319166	0.475121	ACACA	acetyl-CoA carboxylase alpha [Source:NCBI gene;Acc:396504]	19
ENSGALG00000000525	5.39325	-0.340497	-2.48754	0.032106	0.475541	MAP3K3	mitogen-activated protein kinase kinase kinase 3 [Source:NCBI gene;Acc:419954]	27
ENSGALG00000001688	7.25165	-0.625307	-2.48709	0.0321309	0.475541	SEPT5	septin 5 [Source:NCBI gene;Acc:416778]	15
ENSGALG00000012715	2.02371	-0.607891	-2.48678	0.0321478	0.475541	CAP2	cyclase associated actin cytoskeleton regulatory protein 2 [Source:NCBI gene;Acc:420847]	2
ENSGALG00000037929	4.47065	0.499819	2.48819	0.0320703	0.475541	BIN2	bridging integrator 2 [Source:NCBI gene;Acc:777552]	33
ENSGALG00000053595	1.73717	-0.641741	-2.48663	0.0321564	0.475541	CXXC4	CXXC finger protein 4 [Source:HGNC Symbol;Acc:HGNC:24593]	4
ENSGALG00000054891	5.38422	-0.54258	-2.48898	0.0320268	0.475541	RTKN	rhotekin [Source:NCBI gene;Acc:107056271]	4
ENSGALG00000016636	5.2828	-0.740372	-2.48271	0.0323731	0.477512	ARSH	arylsulfatase family	member H [Source:NCBI gene;Acc:378798]	1
ENSGALG00000017329	5.20152	-0.345404	-2.48255	0.0323818	0.477512	FCHSD2	FCH and double SH3 domains 2 [Source:NCBI gene;Acc:419068]	1
ENSGALG00000040886	5.4905	0.295819	2.4823	0.0323959	0.477512			20
ENSGALG00000007059	4.28006	0.638962	2.48149	0.0324406	0.477649	IGSF6	immunoglobulin superfamily member 6 [Source:NCBI gene;Acc:771906]	14
ENSGALG00000001527	4.29941	-0.455611	-2.47932	0.0325617	0.4778	VWA1	von Willebrand factor A domain containing 1 [Source:NCBI gene;Acc:419413]	21
ENSGALG00000006598	2.04353	-0.760511	-2.47951	0.032551	0.4778	SORL1	sortilin related receptor 1 [Source:NCBI gene;Acc:395998]	24
ENSGALG00000017380	7.66302	0.403182	2.47876	0.0325926	0.4778	UQCRHL	ubiquinol-cytochrome c reductase hinge protein like [Source:NCBI gene;Acc:771939]	8
ENSGALG00000038913	1.77283	-0.690736	-2.47931	0.0325621	0.4778	LDLRAD3	low density lipoprotein receptor class A domain containing 3 [Source:NCBI gene;Acc:423160]	5
ENSGALG00000002854	4.44477	-0.438321	-2.47709	0.0326862	0.478177	PDZD2	PDZ domain containing 2 [Source:NCBI gene;Acc:427421]	Z
ENSGALG00000042182	6.91854	0.436754	2.47704	0.0326892	0.478177	OXR1	oxidation resistance 1 [Source:NCBI gene;Acc:420270]	2
ENSGALG00000030703	4.98764	-0.290424	-2.47413	0.0328525	0.480046	CYBRD1	cytochrome b reductase 1 [Source:NCBI gene;Acc:424152]	7
ENSGALG00000015573	5.97591	0.400407	2.47326	0.0329015	0.480241	FHL5	four and a half LIM domains 5 [Source:NCBI gene;Acc:421803]	3
ENSGALG00000005790	5.23303	-1.23542	-2.47144	0.0330039	0.480824		DEP domain containing MTOR-interacting protein [Source:NCBI gene;Acc:419242]	20
ENSGALG00000011289	2.29178	0.484152	2.47003	0.0330841	0.480824	NKIRAS1	NFKB inhibitor interacting Ras like 1 [Source:NCBI gene;Acc:420654]	2
ENSGALG00000014691	6.25511	0.337943	2.47118	0.0330189	0.480824	PHAX	phosphorylated adaptor for RNA export [Source:NCBI gene;Acc:427124]	Z
ENSGALG00000052503	0.0476396	-0.920932	-2.47048	0.0330585	0.480824			Z
ENSGALG00000001459	1.88408	1.03035	2.46764	0.0332195	0.482273	TNNC1	troponin C1	slow skeletal and cardiac type [Source:NCBI gene;Acc:396032]	12
ENSGALG00000009800	5.30958	-0.441075	-2.46549	0.0333418	0.483009	SETD7	SET domain containing lysine methyltransferase 7 [Source:NCBI gene;Acc:422443]	4
ENSGALG00000052743	6.98264	0.272965	2.46612	0.0333062	0.483009	ARL4C	ADP ribosylation factor like GTPase 4C [Source:NCBI gene;Acc:424026]	7
ENSGALG00000025898	5.78968	0.29623	2.46465	0.0333901	0.483189	SMAD6	SMAD family member 6 [Source:NCBI gene;Acc:374096]	10
ENSGALG00000035952	5.02125	0.484727	2.46397	0.0334288	0.483231	KIAA1143	KIAA1143 [Source:NCBI gene;Acc:420709]	2
ENSGALG00000031766	6.25627	0.255324	2.45801	0.0337717	0.485308	PPP1R7	protein phosphatase 1 regulatory subunit 7 [Source:NCBI gene;Acc:424844]	9
ENSGALG00000033356	4.9346	0.399568	2.45905	0.0337119	0.485308	FAHD2A	fumarylacetoacetate hydrolase domain containing 2A [Source:NCBI gene;Acc:426684]	22
ENSGALG00000038089	4.76785	-0.332016	-2.4579	0.0337785	0.485308	EGFR	epidermal growth factor receptor [Source:NCBI gene;Acc:396494]	2
ENSGALG00000046938	4.71671	-0.295937	-2.46017	0.033647	0.485308			10
ENSGALG00000048276	0.757222	-0.944833	-2.45772	0.0337884	0.485308			6
ENSGALG00000052177	1.47424	0.65192	2.46025	0.0336428	0.485308			10
ENSGALG00000004508	4.45665	0.350806	2.45509	0.0339409	0.485401	EYA2	EYA transcriptional coactivator and phosphatase 2 [Source:NCBI gene;Acc:395745]	20
ENSGALG00000011046	8.13733	0.731012	2.45338	0.0340409	0.485401	SNX10	sorting nexin 10 [Source:NCBI gene;Acc:420628]	2
ENSGALG00000015073	6.51395	-0.561117	-2.45327	0.0340468	0.485401	TMEM39A	transmembrane protein 39A [Source:NCBI gene;Acc:418340]	1
ENSGALG00000031893	5.59331	0.283362	2.45607	0.0338843	0.485401	RALA	RAS like proto-oncogene A [Source:NCBI gene;Acc:420765]	2
ENSGALG00000032382	4.69565	-0.348218	-2.45375	0.0340193	0.485401	UBA5	ubiquitin like modifier activating enzyme 5 [Source:NCBI gene;Acc:414879]	2
ENSGALG00000045511	5.09915	0.61697	2.45659	0.0338538	0.485401	PARP9	poly(ADP-ribose) polymerase family member 9 [Source:NCBI gene;Acc:424269]	7
ENSGALG00000045814	1.24668	1.07445	2.45537	0.033925	0.485401	CRLF2	cytokine receptor-like factor 2 [Source:NCBI gene;Acc:418668]	1
ENSGALG00000030401	6.28324	0.328126	2.45019	0.0342269	0.487453	MED31	mediator complex subunit 31 [Source:NCBI gene;Acc:417679]	19
ENSGALG00000002728	6.66471	-0.967949	-2.44633	0.0344538	0.487875	SLC16A3	solute carrier family 16 member 3 [Source:NCBI gene;Acc:395383]	18
ENSGALG00000006352	2.62397	-0.475907	-2.4461	0.0344677	0.487875	CH25H	cholesterol 25-hydroxylase [Source:NCBI gene;Acc:423788]	6
ENSGALG00000009314	5.12538	0.272478	2.44477	0.0345459	0.487875	CACUL1	CDK2 associated cullin domain 1 [Source:NCBI gene;Acc:423926]	6
ENSGALG00000009628	7.32475	0.561312	2.44524	0.0345185	0.487875		potassium channel tetramerization domain containing 12 [Source:NCBI gene;Acc:425504]	4
ENSGALG00000017040	3.8846	-0.620988	-2.44556	0.0344991	0.487875		complement C4A (Rodgers blood group) [Source:NCBI gene;Acc:418892]	1
ENSGALG00000034024	3.77251	-0.481535	-2.4457	0.034491	0.487875	RAPGEF5	Rap guanine nucleotide exchange factor 5 [Source:NCBI gene;Acc:100857462]	2
ENSGALG00000043831	1.18584	-1.20077	-2.44811	0.0343492	0.487875	LRRC73	leucine rich repeat containing 73 [Source:NCBI gene;Acc:421454]	3
ENSGALG00000044811	2.01268	2.36157	2.44806	0.0343523	0.487875		beta-microseminoprotein-like [Source:NCBI gene;Acc:100858647]	6
ENSGALG00000029766	7.61546	-0.346835	-2.44397	0.0345933	0.488033	ITGB5	integrin subunit beta 5 [Source:NCBI gene;Acc:395142]	7
ENSGALG00000006856	6.3523	-0.414611	-2.44324	0.0346367	0.488135	CD151	CD151 molecule (Raph blood group) [Source:NCBI gene;Acc:423105]	5
ENSGALG00000000407	5.17345	0.355563	2.43925	0.0348737	0.488398		LSM7 homolog	U6 small nuclear RNA and mRNA degradation associated [Source:NCBI gene;Acc:420055]	28
ENSGALG00000003212	6.94849	1.50623	2.43806	0.0349451	0.488398	TSPO2	translocator protein 2 [Source:NCBI gene;Acc:419914]	26
ENSGALG00000016755	1.38027	-0.547685	-2.44005	0.0348264	0.488398	CRACDL	CRACD like [Source:HGNC Symbol;Acc:HGNC:33454]	1
ENSGALG00000030377	4.98251	0.329906	2.4407	0.0347878	0.488398	MDFI	MyoD family inhibitor [Source:HGNC Symbol;Acc:HGNC:6967]	26
ENSGALG00000039084	4.22616	1.03303	2.44061	0.0347928	0.488398	EVI2A	ecotropic viral integration site 2A [Source:NCBI gene;Acc:776037]	19
ENSGALG00000040269	2.36059	-0.512017	-2.4397	0.0348471	0.488398			20
ENSGALG00000044235	0.612338	-0.963154	-2.43849	0.0349196	0.488398	MAB21L2	mab-21 like 2 [Source:NCBI gene;Acc:374011]	4
ENSGALG00000051595	1.25227	1.46212	2.43943	0.0348629	0.488398			31
ENSGALG00000001091	1.1887	0.904847	2.43674	0.0350241	0.488996		chromosome 26 C1orf116 homolog [Source:NCBI gene;Acc:419849]	26
ENSGALG00000007418	5.29339	0.556438	2.43331	0.0352302	0.490857	CD3D	CD3d molecule [Source:NCBI gene;Acc:396518]	24
ENSGALG00000015387	5.44723	0.390761	2.43389	0.0351954	0.490857	ATG5	autophagy related 5 [Source:NCBI gene;Acc:421784]	3
ENSGALG00000006350	7.20132	0.293937	2.432	0.0353094	0.491453	DDTL	D-dopachrome tautomerase-like [Source:NCBI gene;Acc:416937]	15
ENSGALG00000000978	4.85959	-0.306533	-2.43138	0.0353465	0.491463	CEP104	centrosomal protein 104 [Source:NCBI gene;Acc:419379]	21
ENSGALG00000001486	2.83502	0.634133	2.42396	0.0357985	0.491697	ZAP70	zeta-chain (TCR) associated protein kinase 70kDa [Source:NCBI gene;Acc:420086]	28
ENSGALG00000002594	6.19949	0.448107	2.41961	0.0360657	0.491697	TFPI	tissue factor pathway inhibitor [Source:NCBI gene;Acc:423989]	7
ENSGALG00000003142	0.191218	-0.962853	-2.41557	0.0363156	0.491697	PRLHRL	prolactin releasing hormone receptor-like [Source:NCBI gene;Acc:431251]	22
ENSGALG00000004438	8.31811	0.440017	2.41466	0.0363719	0.491697	ARSB	arylsulfatase B [Source:NCBI gene;Acc:771459]	Z
ENSGALG00000004475	-0.658809	0.783147	2.41458	0.036377	0.491697		leucine-rich repeat-containing protein 32-like [Source:NCBI gene;Acc:107052104]	4
ENSGALG00000004759	5.49057	0.362921	2.4149	0.0363572	0.491697	DHRS7B	dehydrogenase/reductase 7B [Source:NCBI gene;Acc:416499]	14
ENSGALG00000006655	3.28495	-0.361729	-2.41869	0.0361224	0.491697	MAP3K13	mitogen-activated protein kinase kinase kinase 13 [Source:NCBI gene;Acc:424876]	9
ENSGALG00000007358	4.99619	-0.454157	-2.4252	0.0357227	0.491697	CILP	cartilage intermediate layer protein [Source:NCBI gene;Acc:415533]	10
ENSGALG00000007841	0.285717	-0.650682	-2.42293	0.0358614	0.491697			7
ENSGALG00000008365	3.44496	1.1893	2.41389	0.0364199	0.491697	CHRM4	Gallus gallus cholinergic receptor muscarinic 4 (CHRM4)	mRNA. [Source:RefSeq mRNA;Acc:NM_001031191]	5
ENSGALG00000011624	-0.188125	0.960042	2.42423	0.035782	0.491697	PNLDC1	PARN like	ribonuclease domain containing 1 [Source:NCBI gene;Acc:428595]	3
ENSGALG00000011870	8.98132	-0.551608	-2.42179	0.0359314	0.491697	HIF1A	hypoxia inducible factor 1 subunit alpha [Source:NCBI gene;Acc:374177]	5
ENSGALG00000011914	3.95084	0.336963	2.41575	0.0363046	0.491697	CENPM	centromere protein M [Source:NCBI gene;Acc:417982]	1
ENSGALG00000012273	5.41331	-0.324641	-2.42929	0.0354731	0.491697	SOS2	SOS Ras/Rho guanine nucleotide exchange factor 2 [Source:NCBI gene;Acc:423572]	5
ENSGALG00000012613	3.50956	0.606374	2.42734	0.0355919	0.491697	FBP1	fructose-bisphosphatase 1 [Source:NCBI gene;Acc:395218]	Z
ENSGALG00000015874	5.13718	0.347549	2.42547	0.0357061	0.491697	TTK	TTK protein kinase [Source:NCBI gene;Acc:421849]	3
ENSGALG00000023920	3.31917	-0.474403	-2.4133	0.0364571	0.491697	PHYKPL	5-phosphohydroxy-L-lysine phospho-lyase [Source:NCBI gene;Acc:416374]	13
ENSGALG00000026757	5.02317	0.366562	2.41451	0.0363818	0.491697	DHFR	dihydrofolate reductase [Source:NCBI gene;Acc:427317]	Z
ENSGALG00000031519	4.78546	0.313715	2.41355	0.0364415	0.491697	KHDRBS3	KH RNA binding domain containing	signal transduction associated 3 [Source:NCBI gene;Acc:420317]	2
ENSGALG00000034099	6.8177	0.49581	2.41523	0.036337	0.491697	ATP6V1C1	ATPase H+ transporting V1 subunit C1 [Source:NCBI gene;Acc:420259]	2
ENSGALG00000034294	8.86486	0.625563	2.41631	0.0362694	0.491697	ATP6V0D2	ATPase H+ transporting V0 subunit d2 [Source:NCBI gene;Acc:420210]	2
ENSGALG00000034834	5.45945	-0.436483	-2.42472	0.0357518	0.491697	WWC3	WWC family member 3 [Source:NCBI gene;Acc:418649]	1
ENSGALG00000037156	0.596056	-0.730983	-2.427	0.0356126	0.491697		uncharacterized LOC420807 [Source:NCBI gene;Acc:420807]	2
ENSGALG00000037838	8.16578	0.335396	2.41384	0.036423	0.491697	ND6	NADH dehydrogenase subunit 6 [Source:NCBI gene;Acc:39116944]	MT
ENSGALG00000038374	3.21838	0.393431	2.41499	0.0363518	0.491697	SNX20	sorting nexin 20 [Source:NCBI gene;Acc:415726]	11
ENSGALG00000042151	3.48245	0.448989	2.4264	0.0356491	0.491697			4
ENSGALG00000043799	5.36184	0.666572	2.41482	0.036362	0.491697	DSCC1	DNA replication and sister chromatid cohesion 1 [Source:NCBI gene;Acc:420358]	2
ENSGALG00000044155	5.11115	0.636068	2.42253	0.0358862	0.491697	TMEM140	transmembrane protein 140 [Source:NCBI gene;Acc:417940]	1
ENSGALG00000051607	-0.794236	-0.976059	-2.42546	0.0357067	0.491697			1
ENSGALG00000052612	4.97003	0.361153	2.42	0.0360415	0.491697	RPS27L	ribosomal protein S27 like [Source:NCBI gene;Acc:415372]	10
ENSGALG00000010708	2.9896	-0.489402	-2.41266	0.0364969	0.491742	ICA1	islet cell autoantigen 1 [Source:NCBI gene;Acc:420581]	2
ENSGALG00000001741	7.13233	-0.253248	-2.41076	0.0366155	0.492099	NPTN	neuroplastin [Source:NCBI gene;Acc:415316]	10
ENSGALG00000008536	3.49775	0.382293	2.40961	0.0366878	0.492099	KLHDC3	kelch domain containing 3 [Source:NCBI gene;Acc:421251]	3
ENSGALG00000012756	2.61547	0.476789	2.40975	0.0366787	0.492099	PARPBP	PARP1 binding protein [Source:NCBI gene;Acc:418092]	1
ENSGALG00000040007	3.55292	-1.09675	-2.40874	0.0367423	0.492099	IL17D	interleukin 17D [Source:HGNC Symbol;Acc:HGNC:5984]	1
ENSGALG00000046639	0.0241672	0.932925	2.4096	0.0366883	0.492099	CYP2AC2	cytochrome P450	family 2	subfamily AC	polypeptide 2 [Source:NCBI gene;Acc:107049058]	3
ENSGALG00000052767	4.4785	1.23866	2.40908	0.0367208	0.492099			1
ENSGALG00000034453	5.01677	0.583691	2.40774	0.0368053	0.492454	SAMD11	sterile alpha motif domain containing 11 [Source:NCBI gene;Acc:419434]	21
ENSGALG00000000692	2.07921	-0.44979	-2.39702	0.0374859	0.49336	CDK18	cyclin dependent kinase 18 [Source:NCBI gene;Acc:771736]	26
ENSGALG00000000856	5.67232	0.316634	2.39504	0.0376131	0.49336	EIF2D	eukaryotic translation initiation factor 2D [Source:NCBI gene;Acc:419845]	26
ENSGALG00000001049	4.98135	0.300679	2.38815	0.0380582	0.49336		caspase 1 [Source:NCBI gene;Acc:395764]	19
ENSGALG00000001596	4.83069	-0.451318	-2.40082	0.0372432	0.49336	MLLT1	MLLT1	super elongation complex subunit [Source:NCBI gene;Acc:420089]	28
ENSGALG00000002194	4.95606	0.26365	2.38736	0.0381096	0.49336	MRPL38	mitochondrial ribosomal protein L38 [Source:NCBI gene;Acc:770172]	18
ENSGALG00000003651	4.71902	0.345357	2.39144	0.0378452	0.49336	NT5C3B	5'-nucleotidase	cytosolic IIIB [Source:NCBI gene;Acc:420034]	27
ENSGALG00000004695	7.0054	0.704358	2.39134	0.0378515	0.49336	ECM2	extracellular matrix protein 2 [Source:NCBI gene;Acc:415953]	12
ENSGALG00000004889	5.7302	-0.380805	-2.39681	0.0374994	0.49336	SLC2A1	solute carrier family 2 member 1 [Source:NCBI gene;Acc:396130]	21
ENSGALG00000005331	4.17071	-0.543476	-2.38688	0.0381407	0.49336	GJC2	gap junction protein gamma 2 [Source:NCBI gene;Acc:420397]	2
ENSGALG00000006233	5.78017	-0.358194	-2.39626	0.0375347	0.49336	GALNT11	polypeptide N-acetylgalactosaminyltransferase 11 [Source:NCBI gene;Acc:420436]	2
ENSGALG00000006599	6.13692	-0.253436	-2.38919	0.0379908	0.49336	ZMYND11	zinc finger MYND-type containing 11 [Source:NCBI gene;Acc:420455]	2
ENSGALG00000009479	4.45674	2.27655	2.40169	0.0371875	0.49336		sterile alpha motif domain containing 9 like [Source:NCBI gene;Acc:420559]	2
ENSGALG00000010203	4.78797	-0.32295	-2.39775	0.0374388	0.49336		E3 ubiquitin-protein ligase HECTD3-like [Source:NCBI gene;Acc:424588]	8
ENSGALG00000012536	0.463456	-0.598848	-2.40099	0.0372322	0.49336	GALNT13	polypeptide N-acetylgalactosaminyltransferase 13 [Source:NCBI gene;Acc:424319]	7
ENSGALG00000012952	6.96361	0.509324	2.39008	0.0379328	0.49336	BASP1	brain abundant membrane attached signal protein 1 [Source:NCBI gene;Acc:373905]	2
ENSGALG00000016202	2.14297	0.724422	2.39144	0.037845	0.49336	HSF2BP	heat shock transcription factor 2 binding protein [Source:NCBI gene;Acc:418548]	1
ENSGALG00000016968	-0.445625	1.01589	2.3897	0.0379575	0.49336	CCDC122	coiled-coil domain containing 122 [Source:NCBI gene;Acc:428068]	1
ENSGALG00000024486	-0.0862963	-0.634724	-2.39747	0.0374567	0.49336	C4orf48	chromosome 4 open reading frame 48 [Source:NCBI gene;Acc:422894]	4
ENSGALG00000028227	6.8446	0.243733	2.39642	0.0375243	0.49336	SLC25A20	solute carrier family 25 member 20 [Source:NCBI gene;Acc:416062]	12
ENSGALG00000029857	4.25387	0.530235	2.40172	0.037186	0.49336		GTPase	IMAP family member 6 [Source:NCBI gene;Acc:420413]	2
ENSGALG00000030834	1.17114	-1.05854	-2.39081	0.0378859	0.49336	ATP8B1	ATPase phospholipid transporting 8B1 [Source:NCBI gene;Acc:426857]	Z
ENSGALG00000031182	4.58087	-0.299524	-2.39732	0.0374667	0.49336	FANCM	Fanconi anemia complementation group M [Source:NCBI gene;Acc:100857997]	5
ENSGALG00000032988	5.6265	-0.315485	-2.38705	0.03813	0.49336	PCMT1L	protein-L-isoaspartate (D-aspartate) O-methyltransferase-like [Source:NCBI gene;Acc:423008]	5
ENSGALG00000033920	2.60985	-0.382895	-2.3884	0.0380422	0.49336		ankyrin repeat and MYND domain containing 1 [Source:NCBI gene;Acc:417300]	17
ENSGALG00000034009	4.0699	-0.326729	-2.40235	0.0371456	0.49336	AMPD2	adenosine monophosphate deaminase 2 [Source:NCBI gene;Acc:112530327]	26
ENSGALG00000035031	5.86528	-0.320346	-2.39938	0.0373349	0.49336	HEY1	hes related family bHLH transcription factor with YRPW motif 1 [Source:NCBI gene;Acc:428365]	2
ENSGALG00000037784	6.61976	-0.529706	-2.38669	0.0381533	0.49336	DAG1	dystroglycan 1 [Source:NCBI gene;Acc:100049058]	12
ENSGALG00000040426	7.5724	0.56624	2.40093	0.0372361	0.49336	CREG1	cellular repressor of E1A stimulated genes 1 [Source:NCBI gene;Acc:768680]	1
ENSGALG00000041192	5.43318	0.950775	2.38852	0.0380345	0.49336	IFIH1	interferon induced with helicase C domain 1 [Source:NCBI gene;Acc:424185]	7
ENSGALG00000043100	7.20895	-0.699207	-2.39013	0.0379297	0.49336	SRPX	sushi repeat containing protein	X-linked [Source:NCBI gene;Acc:418579]	1
ENSGALG00000047621	3.52302	-0.459005	-2.40036	0.0372725	0.49336	YBEY	ybeY metallopeptidase (putative) [Source:NCBI gene;Acc:107053767]	7
ENSGALG00000049347	3.5836	0.372211	2.38839	0.0380425	0.49336			4
ENSGALG00000051954	3.98855	0.49364	2.39832	0.0374023	0.49336	RBM43	RNA binding motif protein 43 [Source:NCBI gene;Acc:424313]	7
ENSGALG00000052173	0.689079	0.947536	2.39878	0.037373	0.49336			31
ENSGALG00000052865	0.435963	-0.626843	-2.3965	0.0375192	0.49336			30
ENSGALG00000014182	1.73287	0.668096	2.3846	0.0382897	0.494649	ADORA2B	adenosine A2b receptor [Source:NCBI gene;Acc:395971]	19
ENSGALG00000006073	5.32944	0.248244	2.383	0.0383948	0.495531	NDUFAB1	NADH:ubiquinone oxidoreductase subunit AB1 [Source:NCBI gene;Acc:416571]	14
ENSGALG00000001768	3.1562	-1.18725	-2.3735	0.0390226	0.495572	TENM2	teneurin transmembrane protein 2 [Source:NCBI gene;Acc:373854]	13
ENSGALG00000004266	4.59921	0.378639	2.38132	0.0385048	0.495572	TNFAIP8L1	TNF alpha induced protein 8 like 1 [Source:NCBI gene;Acc:420162]	28
ENSGALG00000004612	5.42022	0.468463	2.37535	0.0388997	0.495572	MTHFR	methylenetetrahydrofolate reductase [Source:NCBI gene;Acc:419489]	21
ENSGALG00000004614	4.02223	0.80058	2.37964	0.0386155	0.495572	NPL	N-acetylneuraminate pyruvate lyase [Source:NCBI gene;Acc:429074]	8
ENSGALG00000005128	2.31805	-0.454017	-2.38084	0.0385363	0.495572	PTPDC1	protein tyrosine phosphatase domain containing 1 [Source:NCBI gene;Acc:415979]	12
ENSGALG00000007448	2.23718	-0.677994	-2.37413	0.038981	0.495572	SPRY3	sprouty RTK signaling antagonist 3 [Source:NCBI gene;Acc:428712]	4
ENSGALG00000008294	4.59081	-0.36161	-2.38038	0.0385668	0.495572	ITPR1	inositol 1	4	5-trisphosphate receptor type 1 [Source:NCBI gene;Acc:395412]	12
ENSGALG00000014751	3.18808	-0.46542	-2.37308	0.0390508	0.495572	ADAMTS6	ADAM metallopeptidase with thrombospondin type 1 motif 6 [Source:NCBI gene;Acc:427160]	Z
ENSGALG00000016463	6.55816	0.61428	2.37528	0.0389045	0.495572	FAM49A	family with sequence similarity 49 member A [Source:NCBI gene;Acc:421949]	3
ENSGALG00000032530	3.27627	0.610273	2.37295	0.0390593	0.495572	SASH3	SAM and SH3 domain containing 3 [Source:NCBI gene;Acc:422138]	4
ENSGALG00000033618	5.35017	-0.403626	-2.37367	0.0390116	0.495572	MYO9A	myosin IXA [Source:NCBI gene;Acc:101748321]	10
ENSGALG00000033953	5.51168	-0.338765	-2.37536	0.0388987	0.495572	SHROOM4	shroom family member 4 [Source:NCBI gene;Acc:777072]	4
ENSGALG00000034399	6.12366	-0.331565	-2.37593	0.038861	0.495572	TNS2	tensin 2 [Source:NCBI gene;Acc:107049861]	33
ENSGALG00000035799	0.706552	0.908261	2.38149	0.0384936	0.495572	SHISA9	shisa family member 9 [Source:HGNC Symbol;Acc:HGNC:37231]	14
ENSGALG00000037401	7.27301	0.36834	2.37469	0.0389435	0.495572	IDH3A	isocitrate dehydrogenase 3 (NAD(+)) alpha [Source:NCBI gene;Acc:415362]	10
ENSGALG00000038838	5.3228	0.288858	2.37361	0.0390151	0.495572	NSMAF	neutral sphingomyelinase activation associated factor [Source:NCBI gene;Acc:421137]	2
ENSGALG00000040620	3.59738	-0.563643	-2.37809	0.0387178	0.495572	LSAMP	limbic system-associated membrane protein [Source:NCBI gene;Acc:395687]	1
ENSGALG00000052494	1.01289	0.621476	2.37543	0.0388941	0.495572		chromosome 4 open reading frame	human C4orf50 [Source:NCBI gene;Acc:422853]	4
ENSGALG00000003521	10.1002	0.35954	2.3722	0.0391096	0.495744	TPM1	tropomyosin 1 (alpha) [Source:NCBI gene;Acc:396366]	10
ENSGALG00000012296	7.0953	0.237126	2.37122	0.0391746	0.496101	EIF3L	eukaryotic translation initiation factor 3 subunit L [Source:NCBI gene;Acc:418033]	1
ENSGALG00000011690	3.24074	-1.16829	-2.37032	0.0392351	0.496401	CLBA1	chromosome 5 C14orf79 homolog [Source:NCBI gene;Acc:423498]	5
ENSGALG00000013723	6.15051	1.67454	2.36972	0.0392753	0.496444	OASL	2'-5'-oligoadenylate synthetase like [Source:NCBI gene;Acc:395908]	12
ENSGALG00000000607	2.02457	-1.28037	-2.35502	0.0402735	0.496481	GPR37L1	G protein-coupled receptor 37 like 1 [Source:NCBI gene;Acc:421176]	26
ENSGALG00000000734	5.54674	0.260044	2.36615	0.0395151	0.496481	RPA2	replication protein A2 [Source:NCBI gene;Acc:419566]	23
ENSGALG00000002495	6.29005	0.353482	2.36573	0.0395437	0.496481	CHCHD2P9	coiled-coil-helix-coiled-coil-helix domain containing 2 pseudogene 9 [Source:NCBI gene;Acc:417544]	19
ENSGALG00000002722	3.76407	-0.483992	-2.34655	0.0408594	0.496481	MST1	macrophage stimulating 1 (hepatocyte growth factor-like) [Source:NCBI gene;Acc:396135]	12
ENSGALG00000003590	4.06689	-0.488369	-2.36214	0.0397866	0.496481	C17orf58	chromosome 18 C17orf58 homolog [Source:NCBI gene;Acc:417421]	18
ENSGALG00000003597	7.01114	0.525205	2.36878	0.0393387	0.496481	AK2	adenylate kinase 2 [Source:NCBI gene;Acc:428227]	23
ENSGALG00000004128	1.52881	-0.713719	-2.36146	0.0398328	0.496481	CYSLTR1	cysteinyl leukotriene receptor 1 [Source:NCBI gene;Acc:428691]	4
ENSGALG00000005541	1.35331	-0.914124	-2.35561	0.0402328	0.496481	GJB1	gap junction protein beta 1 [Source:NCBI gene;Acc:378797]	4
ENSGALG00000005757	6.42638	0.53529	2.35666	0.0401609	0.496481	IRF8	interferon regulatory factor 8 [Source:NCBI gene;Acc:396385]	11
ENSGALG00000006298	6.21054	0.271671	2.35189	0.0404888	0.496481	ATG4B	autophagy related 4B cysteine peptidase [Source:NCBI gene;Acc:404750]	9
ENSGALG00000006725	12.0623	-0.98999	-2.36158	0.0398248	0.496481	ACAN	aggrecan [Source:NCBI gene;Acc:395798]	10
ENSGALG00000006947	7.19037	0.30383	2.346	0.0408975	0.496481	BDH1A	3-hydroxybutyrate dehydrogenase	type 1 A [Source:NCBI gene;Acc:424891]	9
ENSGALG00000007462	8.19561	0.430354	2.35201	0.0404805	0.496481	CTSZ	cathepsin Z [Source:NCBI gene;Acc:419311]	20
ENSGALG00000008728	3.28608	0.423012	2.35395	0.0403466	0.496481	PTER	phosphotriesterase related [Source:NCBI gene;Acc:420525]	2
ENSGALG00000008865	5.75811	0.387277	2.36393	0.0396656	0.496481	ALAD	aminolevulinate dehydratase [Source:NCBI gene;Acc:417273]	17
ENSGALG00000008870	6.57736	0.402279	2.34776	0.0407753	0.496481	ZDHHC6	zinc finger DHHC-type containing 6 [Source:NCBI gene;Acc:423897]	6
ENSGALG00000009842	7.54496	0.259292	2.35388	0.0403517	0.496481	RASSF3	Ras association domain family member 3 [Source:NCBI gene;Acc:417828]	1
ENSGALG00000010282	4.64346	-0.358766	-2.36082	0.0398768	0.496481	TMEM63B	transmembrane protein 63B [Source:HGNC Symbol;Acc:HGNC:17735]	3
ENSGALG00000010290	5.69218	-0.39391	-2.34739	0.0408006	0.496481	VEGFA	vascular endothelial growth factor A [Source:NCBI gene;Acc:395909]	3
ENSGALG00000011285	6.22091	0.410367	2.36489	0.0396002	0.496481		nudix hydrolase 4 [Source:NCBI gene;Acc:417897]	1
ENSGALG00000011572	4.75061	0.404752	2.34901	0.0406882	0.496481	ASPG	asparaginase [Source:NCBI gene;Acc:772201]	5
ENSGALG00000011950	8.28321	0.297163	2.35816	0.0400583	0.496481	ACO2	aconitase 2 [Source:NCBI gene;Acc:374009]	1
ENSGALG00000013094	0.617894	0.867885	2.34553	0.0409304	0.496481	DDC	dopa decarboxylase [Source:NCBI gene;Acc:420947]	2
ENSGALG00000013590	5.60878	0.303942	2.35421	0.0403287	0.496481		FSHD region gene 1 family member B	pseudogene [Source:NCBI gene;Acc:422726]	4
ENSGALG00000014835	5.90442	1.33474	2.34547	0.0409348	0.496481	C7	complement C7 [Source:NCBI gene;Acc:427187]	Z
ENSGALG00000015531	6.17952	0.585547	2.3586	0.0400276	0.496481	PPP2R2C	protein phosphatase 2 regulatory subunit Bgamma [Source:NCBI gene;Acc:422858]	4
ENSGALG00000026426	3.96991	-0.417085	-2.35986	0.0399419	0.496481			2
ENSGALG00000026846	1.05269	-0.723738	-2.35568	0.040228	0.496481	JMJD7	jumonji domain containing 7 [Source:NCBI gene;Acc:423221]	5
ENSGALG00000028354	8.54154	0.385178	2.36383	0.0396725	0.496481	METRNL	meteorin	glial cell differentiation regulator-like [Source:NCBI gene;Acc:417332]	18
ENSGALG00000028872	10.0344	0.31853	2.34762	0.0407848	0.496481	TPT1	tumor protein	translationally-controlled 1 [Source:NCBI gene;Acc:396363]	1
ENSGALG00000031503	3.748	-0.521169	-2.36754	0.0394218	0.496481	LRP6	LDL receptor related protein 6 [Source:NCBI gene;Acc:419097]	1
ENSGALG00000031565	-0.2641	-0.673275	-2.35227	0.0404627	0.496481	NEBL	nebulette [Source:NCBI gene;Acc:395148]	2
ENSGALG00000032178	4.68789	0.331572	2.35024	0.0406032	0.496481	MAP2K4	mitogen-activated protein kinase kinase 4 [Source:NCBI gene;Acc:417312]	18
ENSGALG00000037257	2.08604	-0.545964	-2.36162	0.0398219	0.496481	HLX	H2.0 like homeobox [Source:NCBI gene;Acc:107052956]	3
ENSGALG00000041408	1.81222	-0.655531	-2.36683	0.0394696	0.496481			11
ENSGALG00000041456	1.91886	-0.723791	-2.36009	0.0399266	0.496481	SLC35G1	solute carrier family 35 member G1 [Source:NCBI gene;Acc:423800]	6
ENSGALG00000041619	8.28355	0.320593	2.35414	0.0403341	0.496481	MTPN	myotrophin [Source:NCBI gene;Acc:395702]	1
ENSGALG00000043072	-0.359094	-0.945466	-2.35082	0.0405627	0.496481	POU6F1	POU class 6 homeobox 1 [Source:HGNC Symbol;Acc:HGNC:9224]	33
ENSGALG00000043618	9.63471	-0.444042	-2.36316	0.0397178	0.496481	SLC40A1	solute carrier family 40 member 1 [Source:NCBI gene;Acc:423984]	7
ENSGALG00000043775	4.87668	-0.604844	-2.34687	0.0408374	0.496481	RAPGEF3	Rap guanine nucleotide exchange factor 3 [Source:NCBI gene;Acc:426888]	33
ENSGALG00000045093	3.51792	-0.345337	-2.34586	0.0409073	0.496481		chromosome 1 C12orf50 homolog [Source:NCBI gene;Acc:417885]	1
ENSGALG00000046992	4.57674	0.342694	2.35094	0.0405546	0.496481	MCRIP2	family with sequence similarity 195	member A [Source:NCBI gene;Acc:425184]	14
ENSGALG00000048653	-0.126455	0.783015	2.35391	0.0403497	0.496481			3
ENSGALG00000049423	0.835937	0.732081	2.35518	0.040262	0.496481			1
ENSGALG00000050260	1.4918	-0.597184	-2.36304	0.0397257	0.496481			22
ENSGALG00000033405	4.34837	-0.300145	-2.34379	0.0410524	0.497461	DBN1	drebrin 1 [Source:NCBI gene;Acc:396496]	13
ENSGALG00000000357	3.3443	-0.418681	-2.3176	0.0429266	0.497566		ADAM like decysin 1 [Source:NCBI gene;Acc:419529]	22
ENSGALG00000000729	5.30578	0.283854	2.31223	0.0433209	0.497566	PPP1R8	protein phosphatase 1 regulatory subunit 8 [Source:NCBI gene;Acc:419564]	23
ENSGALG00000002201	1.92217	-1.71548	-2.33088	0.0419662	0.497566	PPL	periplakin [Source:NCBI gene;Acc:408044]	14
ENSGALG00000003475	6.85868	-0.508246	-2.31335	0.0432387	0.497566	ACLY	ATP citrate lyase [Source:NCBI gene;Acc:395373]	27
ENSGALG00000003863	4.14535	0.48303	2.31401	0.0431896	0.497566	P2RX7	purinergic receptor P2X 7 [Source:NCBI gene;Acc:771952]	15
ENSGALG00000003886	1.72909	-1.02427	-2.34101	0.0412476	0.497566	SGCD	sarcoglycan delta [Source:NCBI gene;Acc:416251]	13
ENSGALG00000004044	0.808525	1.03264	2.31713	0.0429606	0.497566	CSRP3	cysteine and glycine rich protein 3 [Source:NCBI gene;Acc:422979]	5
ENSGALG00000005964	3.69615	0.579947	2.33605	0.0415974	0.497566		family with sequence similarity 162	member B [Source:NCBI gene;Acc:422224]	4
ENSGALG00000006083	2.0646	-0.491224	-2.3419	0.0411847	0.497566		lamin-L(III)-like [Source:NCBI gene;Acc:415464]	10
ENSGALG00000006474	8.37911	0.308339	2.32046	0.0427183	0.497566	SKP1	S-phase kinase-associated protein 1 [Source:NCBI gene;Acc:416319]	13
ENSGALG00000007863	6.93072	0.278916	2.31817	0.0428851	0.497566	COX7B	cytochrome c oxidase subunit 7B [Source:NCBI gene;Acc:771947]	4
ENSGALG00000008326	3.46119	-0.408804	-2.31537	0.04309	0.497566		synaptotagmin-like protein 2-like [Source:NCBI gene;Acc:422353]	4
ENSGALG00000008447	2.41733	0.495461	2.3355	0.0416366	0.497566	SH2D1A	SH2 domain containing 1A [Source:NCBI gene;Acc:100857869]	4
ENSGALG00000008591	0.234877	-0.830577	-2.34311	0.0410997	0.497566	CACNB2	calcium voltage-gated channel auxiliary subunit beta 2 [Source:NCBI gene;Acc:428420]	2
ENSGALG00000008998	0.314853	-0.625812	-2.33765	0.041484	0.497566	FAM179A	family with sequence similarity 179 member A [Source:NCBI gene;Acc:421296]	3
ENSGALG00000009240	7.23354	0.451155	2.32341	0.0425034	0.497566	NFE2L2	nuclear factor	erythroid 2 like 2 [Source:NCBI gene;Acc:396014]	7
ENSGALG00000009304	4.68593	-0.439987	-2.3276	0.0422012	0.497566	RAB11FIP2	RAB11 family interacting protein 2 [Source:NCBI gene;Acc:423924]	6
ENSGALG00000010296	5.07206	0.286812	2.33405	0.04174	0.497566	MRPS18A	mitochondrial ribosomal protein S18A [Source:NCBI gene;Acc:421445]	3
ENSGALG00000010628	5.67003	0.313576	2.32165	0.0426311	0.497566	ACSL1	acyl-CoA synthetase long-chain family member 1 [Source:NCBI gene;Acc:422547]	4
ENSGALG00000010801	0.98127	-1.76636	-2.33518	0.0416596	0.497566	TMEM61	transmembrane protein 61 [Source:NCBI gene;Acc:424662]	8
ENSGALG00000010928	11.1215	0.464743	2.34038	0.041292	0.497566			4
ENSGALG00000010934	3.14541	-0.683058	-2.33057	0.041988	0.497566	PATJ	PATJ	crumbs cell polarity complex component [Source:NCBI gene;Acc:424682]	8
ENSGALG00000011301	4.65479	0.255367	2.3136	0.0432203	0.497566	LRRC40	leucine rich repeat containing 40 [Source:NCBI gene;Acc:424713]	8
ENSGALG00000013512	6.55952	0.24484	2.31826	0.0428786	0.497566	BTF3	basic transcription factor 3 [Source:NCBI gene;Acc:426154]	Z
ENSGALG00000013615	4.52022	-0.36805	-2.31465	0.0431427	0.497566	MTUS1	microtubule associated tumor suppressor 1 [Source:NCBI gene;Acc:422729]	4
ENSGALG00000013993	4.08743	-0.710242	-2.32707	0.0422391	0.497566	VNN1	vanin 1 [Source:NCBI gene;Acc:421702]	3
ENSGALG00000014203	4.26827	0.597013	2.32443	0.0424301	0.497566	PARVG	parvin gamma [Source:NCBI gene;Acc:418236]	1
ENSGALG00000014412	8.42306	0.619418	2.33204	0.0418831	0.497566	CSTA	cystatin A [Source:NCBI gene;Acc:418268]	1
ENSGALG00000015002	5.15173	0.341585	2.31032	0.0434626	0.497566	MRPS27	mitochondrial ribosomal protein S27 [Source:NCBI gene;Acc:427216]	Z
ENSGALG00000015013	4.78084	0.451439	2.31563	0.0430712	0.497566	MSX1	msh homeobox 1 [Source:NCBI gene;Acc:396484]	4
ENSGALG00000015496	6.57716	0.453358	2.32067	0.042703	0.497566	CHMP2B	charged multivesicular body protein 2B [Source:NCBI gene;Acc:418461]	1
ENSGALG00000015663	6.04227	0.441667	2.30986	0.043496	0.497566	HSDL2	hydroxysteroid dehydrogenase like 2 [Source:NCBI gene;Acc:100858057]	Z
ENSGALG00000015877	2.60496	0.854376	2.32694	0.042249	0.497566	SH3BGRL2	SH3 domain binding glutamate rich protein like 2 [Source:HGNC Symbol;Acc:HGNC:15567]	3
ENSGALG00000017289	4.83999	0.561123	2.32289	0.0425413	0.497566	C12orf4	chromosome 1 open reading frame	human C12orf4 [Source:NCBI gene;Acc:419041]	1
ENSGALG00000020679	-0.437474	-1.14039	-2.31844	0.0428649	0.497566		pleckstrin homology domain containing S1 [Source:NCBI gene;Acc:101750407]	6
ENSGALG00000021025	5.73718	0.699221	2.33129	0.0419366	0.497566		bactericidal permeability-increasing protein-like [Source:NCBI gene;Acc:419276]	20
ENSGALG00000025649	0.110735	0.674267	2.31054	0.0434461	0.497566		small nucleolar RNA SNORA47 [Source:NCBI gene;Acc:112530794]	Z
ENSGALG00000025999	8.0386	0.500864	2.31604	0.0430405	0.497566	NDUFA4	NDUFA4	mitochondrial complex associated [Source:NCBI gene;Acc:772135]	2
ENSGALG00000027305	1.24564	0.562423	2.32674	0.0422633	0.497566	SKAP1	src kinase associated phosphoprotein 1 [Source:NCBI gene;Acc:101752206]	27
ENSGALG00000027907	3.49571	0.340542	2.33853	0.0414223	0.497566	NR2F1	nuclear receptor subfamily 2 group F member 1 [Source:NCBI gene;Acc:100859519]	Z
ENSGALG00000027961	3.09271	0.455784	2.32958	0.0420594	0.497566	PCASP2	paracaspase 2 [Source:NCBI gene;Acc:429451]	28
ENSGALG00000029292	7.2302	0.322944	2.32367	0.0424847	0.497566	PCNA	proliferating cell nuclear antigen [Source:NCBI gene;Acc:373984]	22
ENSGALG00000029494	7.03892	1.15594	2.33625	0.0415838	0.497566	BGLAP	bone gamma-carboxyglutamate protein [Source:NCBI gene;Acc:396348]	23
ENSGALG00000031035	6.98481	0.394948	2.32108	0.042673	0.497566	PCMTD1	protein-L-isoaspartate (D-aspartate) O-methyltransferase domain containing 1 [Source:NCBI gene;Acc:421114]	2
ENSGALG00000031916	2.25127	1.08744	2.31508	0.0431112	0.497566	ZP1	zona pellucida glycoprotein 1 [Source:NCBI gene;Acc:395418]	5
ENSGALG00000032984	5.14211	0.273393	2.3301	0.0420221	0.497566	MEX3B	mex-3 RNA binding family member B [Source:HGNC Symbol;Acc:HGNC:25297]	10
ENSGALG00000033880	5.90992	-0.779548	-2.33327	0.0417956	0.497566	CRISPLD1	cysteine rich secretory protein LCCL domain containing 1 [Source:NCBI gene;Acc:395369]	2
ENSGALG00000035029	4.89477	0.361868	2.3352	0.041658	0.497566		vaccinia related kinase 3 [Source:NCBI gene;Acc:770440]	14
ENSGALG00000035260	4.69088	-0.362404	-2.32748	0.0422101	0.497566	RBM14	RNA binding motif protein 14 [Source:NCBI gene;Acc:426080]	33
ENSGALG00000035309	-0.671019	-1.40737	-2.32397	0.0424634	0.497566	HBE	hemoglobin subunit epsilon [Source:NCBI gene;Acc:107049060]	1
ENSGALG00000036133	2.78858	-0.628759	-2.33362	0.0417701	0.497566	KLF15	Kruppel like factor 15 [Source:NCBI gene;Acc:427588]	12
ENSGALG00000036252	4.16559	0.401602	2.33092	0.0419629	0.497566	SAP30	Sin3A associated protein 30 [Source:NCBI gene;Acc:422562]	4
ENSGALG00000037791	4.70983	-0.521394	-2.31525	0.0430987	0.497566	FRMD4B	FERM domain containing 4B [Source:NCBI gene;Acc:426071]	12
ENSGALG00000039634	0.120213	-0.940973	-2.32587	0.0423262	0.497566	KRT80	keratin 80 [Source:NCBI gene;Acc:431302]	33
ENSGALG00000040113	-1.15094	1.16876	2.31273	0.0432843	0.497566	SFT2D3	SFT2 domain containing 3 [Source:NCBI gene;Acc:107051882]	9
ENSGALG00000042894	5.89347	0.342312	2.31617	0.0430315	0.497566	SLC25A39	solute carrier family 25 member 39 [Source:NCBI gene;Acc:427072]	27
ENSGALG00000043254	2.78937	0.983221	2.33401	0.0417425	0.497566	EPX	eosinophil peroxidase [Source:NCBI gene;Acc:417467]	19
ENSGALG00000047017	-0.323089	-1.046	-2.31067	0.0434364	0.497566	PHYHIP	phytanoyl-CoA 2-hydroxylase interacting protein [Source:NCBI gene;Acc:112530160]	22
ENSGALG00000047285	7.79869	1.07815	2.31037	0.0434587	0.497566	BD7	avian beta-defensin 7 [Source:NCBI gene;Acc:407777]	3
ENSGALG00000048634	1.28352	0.603369	2.32943	0.0420698	0.497566			4
ENSGALG00000048954	8.12435	0.555127	2.32039	0.0427227	0.497566	DMP1	dentin matrix acidic phosphoprotein 1 [Source:NCBI gene;Acc:404539]	4
ENSGALG00000049027	4.41621	0.514218	2.33724	0.0415134	0.497566		endogenous retrovirus group K member 9 Pol protein-like [Source:NCBI gene;Acc:107054036]	8
ENSGALG00000050691	0.669058	-0.721149	-2.31453	0.0431514	0.497566			2
ENSGALG00000050838	1.05707	-0.562615	-2.31655	0.0430032	0.497566			8
ENSGALG00000052384	3.41199	-0.409291	-2.33472	0.0416919	0.497566			21
ENSGALG00000053317	3.74406	-0.319619	-2.31633	0.0430195	0.497566			23
ENSGALG00000038311	4.23532	-0.848714	-2.30926	0.0435405	0.497568	COL18A1	collagen	type XVIII	alpha 1 [Source:NCBI gene;Acc:373978]	7
ENSGALG00000053549	5.9819	-0.281066	-2.30887	0.04357	0.497568	ADAM8	ADAM metallopeptidase domain 8 [Source:NCBI gene;Acc:423672]	6
ENSGALG00000000151	1.56322	-0.651938	-2.30612	0.0437741	0.497628	ADAMTS19	ADAM metallopeptidase with thrombospondin type 1 motif	19 [Source:NCBI gene;Acc:415600]	Z
ENSGALG00000000699	8.21155	-0.758584	-2.29814	0.0443731	0.497628	WWP2	WW domain containing E3 ubiquitin protein ligase 2 [Source:NCBI gene;Acc:415868]	11
ENSGALG00000003572	5.27555	0.289342	2.29716	0.0444471	0.497628	ARHGEF18	Rho/Rac guanine nucleotide exchange factor 18 [Source:NCBI gene;Acc:420132]	28
ENSGALG00000004169	6.98795	-0.508649	-2.29701	0.0444583	0.497628		fibronectin type III domain containing 3A-like [Source:NCBI gene;Acc:422151]	4
ENSGALG00000008127	7.72762	0.560708	2.3001	0.0442254	0.497628	SPI1	Spi-1 proto-oncogene [Source:NCBI gene;Acc:395879]	5
ENSGALG00000008428	-0.361596	0.986254	2.30412	0.0439233	0.497628	CDK15	cyclin dependent kinase 15 [Source:HGNC Symbol;Acc:HGNC:14434]	7
ENSGALG00000008733	6.05698	0.594465	2.29873	0.0443284	0.497628	LPAR3	lysophosphatidic acid receptor 3 [Source:NCBI gene;Acc:771215]	8
ENSGALG00000012160	4.24578	0.286926	2.29773	0.0444042	0.497628	KIF18A	kinesin family member 18A [Source:NCBI gene;Acc:421607]	5
ENSGALG00000012606	6.10782	0.384719	2.2963	0.0445119	0.497628	ISCA1	iron-sulfur cluster assembly 1 [Source:NCBI gene;Acc:427463]	Z
ENSGALG00000014873	10.6339	0.757237	2.30439	0.043903	0.497628	GJA1	gap junction protein alpha 1 [Source:NCBI gene;Acc:395278]	3
ENSGALG00000016420	7.10222	-0.271857	-2.296	0.0445345	0.497628	SH3KBP1	SH3 domain containing kinase binding protein 1 [Source:NCBI gene;Acc:418608]	1
ENSGALG00000016495	1.53864	-0.481509	-2.29911	0.0442995	0.497628			3
ENSGALG00000016673	6.01323	-0.370563	-2.30497	0.0438599	0.497628	TRAM2	translocation associated membrane protein 2 [Source:NCBI gene;Acc:422040]	3
ENSGALG00000017163	6.70758	0.221483	2.29705	0.0444556	0.497628	ACAT1	acetyl-CoA acetyltransferase 1 [Source:NCBI gene;Acc:418968]	1
ENSGALG00000017414	5.91431	-0.333327	-2.29704	0.0444558	0.497628	JUP	junction plakoglobin [Source:NCBI gene;Acc:429710]	27
ENSGALG00000023821	3.34148	0.855307	2.29871	0.0443296	0.497628	DHX58	DExH-box helicase 58 [Source:NCBI gene;Acc:100858653]	27
ENSGALG00000028273	6.56364	1.53816	2.30093	0.0441625	0.497628	HBE1	hemoglobin subunit epsilon 1 [Source:NCBI gene;Acc:428114]	1
ENSGALG00000029896	5.81087	-0.361322	-2.30439	0.0439035	0.497628		Rap guanine nucleotide exchange factor 6 [Source:NCBI gene;Acc:101751943]	13
ENSGALG00000033282	5.3371	0.255553	2.29817	0.0443704	0.497628			6
ENSGALG00000039322	6.34701	-0.444596	-2.29909	0.0443013	0.497628	DDR2	discoidin domain receptor tyrosine kinase 2 [Source:NCBI gene;Acc:396404]	8
ENSGALG00000043734	5.16679	-0.592057	-2.30642	0.0437518	0.497628	LIPG	lipase G	endothelial type [Source:NCBI gene;Acc:426846]	Z
ENSGALG00000048295	6.41104	0.287877	2.29675	0.0444777	0.497628	IRX6	iroquois homeobox 6 [Source:HGNC Symbol;Acc:HGNC:14675]	11
ENSGALG00000051458	3.47571	0.487857	2.2974	0.0444285	0.497628			33
ENSGALG00000051780	0.0830966	0.664458	2.30208	0.0440761	0.497628			2
ENSGALG00000054196	-0.00196491	-1.0102	-2.3072	0.0436939	0.497628		chemokine [Source:NCBI gene;Acc:771679]	19
ENSGALG00000055112	0.567241	-0.736041	-2.3025	0.0440449	0.497628			24
ENSGALG00000011976	4.57664	0.283962	2.29505	0.044607	0.498026	L3MBTL2	L3MBTL2	polycomb repressive complex 1 subunit [Source:NCBI gene;Acc:417999]	1
ENSGALG00000039498	6.06319	-0.432991	-2.29431	0.0446634	0.498242	PPP3CA	protein phosphatase 3	catalytic subunit	alpha isozyme [Source:NCBI gene;Acc:395113]	4
ENSGALG00000004276	5.00022	-0.472755	-2.29171	0.0448611	0.498356	CHST12	carbohydrate sulfotransferase 12 [Source:NCBI gene;Acc:416469]	14
ENSGALG00000009540	5.75469	0.499704	2.29181	0.0448534	0.498356	YAF2	YY1 associated factor 2 [Source:NCBI gene;Acc:417790]	1
ENSGALG00000010674	5.39809	0.48629	2.29126	0.0448953	0.498356	DCTD	dCMP deaminase [Source:NCBI gene;Acc:422556]	4
ENSGALG00000019696	6.68157	0.746474	2.29319	0.0447484	0.498356	CATHL2	cathelicidin antimicrobial peptide [Source:NCBI gene;Acc:420407]	2
ENSGALG00000033094	0.0188825	0.767691	2.29347	0.0447271	0.498356		nuclear factor interleukin-3-regulated protein-like [Source:NCBI gene;Acc:101748229]	28
ENSGALG00000048687	5.5508	0.581405	2.29169	0.0448629	0.498356		tetratricopeptide repeat domain 38 [Source:NCBI gene;Acc:426193]	1
ENSGALG00000003059	2.247	-0.513211	-2.2899	0.0449993	0.498866	HLF	HLF	PAR bZIP transcription factor [Source:NCBI gene;Acc:417395]	18
ENSGALG00000012055	4.25543	0.726099	2.28842	0.0451127	0.498866		anti-Mullerian hormone receptor	type II [Source:NCBI gene;Acc:424261]	7
ENSGALG00000013911	5.76843	0.786204	2.28888	0.0450781	0.498866	ZC3HAV1	zinc finger CCCH-type containing	antiviral 1 [Source:NCBI gene;Acc:426315]	1
ENSGALG00000014094	6.03104	-0.42928	-2.28825	0.0451262	0.498866	STK38L	serine/threonine kinase 38 like [Source:NCBI gene;Acc:418217]	1
ENSGALG00000030847	3.05327	-0.670674	-2.28945	0.0450338	0.498866	FZD2	frizzled class receptor 2 [Source:NCBI gene;Acc:374061]	27
ENSGALG00000030918	9.05433	-0.240775	-2.28715	0.0452109	0.499137	RBM3	RNA binding motif (RNP1	RRM) protein 3 [Source:NCBI gene;Acc:425789]	28
ENSGALG00000034773	4.63317	-0.284969	-2.28697	0.0452247	0.499137	TOGARAM1	family with sequence similarity 179 member B [Source:NCBI gene;Acc:423595]	5
ENSGALG00000006407	5.34725	-0.423334	-2.2851	0.045369	0.499928		Gallus gallus death domain-containing tumor necrosis factor receptor superfamily member 23 (LOC378902)	mRNA. [Source:RefSeq mRNA;Acc:NM_204386]	5
ENSGALG00000015630	2.69678	-1.44107	-2.28507	0.0453705	0.499928	EDIL3	EGF like repeats and discoidin domains 3 [Source:NCBI gene;Acc:427326]	Z
ENSGALG00000006378	6.70879	0.481878	2.28244	0.0455747	0.500295	LIPA	lipase A	lysosomal acid type [Source:NCBI gene;Acc:423789]	6
ENSGALG00000026167	5.7037	-0.413437	-2.28281	0.0455454	0.500295	PIK3R5	phosphoinositide-3-kinase regulatory subunit 5 [Source:NCBI gene;Acc:417319]	18
ENSGALG00000036556	6.58493	0.245293	2.28225	0.0455893	0.500295	MORC4	MORC family CW-type zinc finger 4 [Source:NCBI gene;Acc:418513]	1
ENSGALG00000046986	0.726606	-0.743861	-2.28289	0.0455392	0.500295		SH2B adapter protein 1-like [Source:NCBI gene;Acc:112530163]	22
ENSGALG00000049951	4.81311	-0.899488	-2.28412	0.0454441	0.500295	SPOCK2	SPARC/osteonectin	cwcv and kazal like domains proteoglycan 2 [Source:NCBI gene;Acc:100858414]	6
ENSGALG00000030115	6.71514	0.571832	2.28072	0.0457081	0.500784	WISP1	WNT1 inducible signaling pathway protein 1 [Source:NCBI gene;Acc:420322]	2
ENSGALG00000032270	4.86323	0.274573	2.28119	0.0456715	0.500784	NCAPH	non-SMC condensin I complex subunit H [Source:NCBI gene;Acc:425304]	22
ENSGALG00000006051	4.34635	0.382546	2.27894	0.0458464	0.501579	CDC7	cell division cycle 7 [Source:NCBI gene;Acc:424507]	8
ENSGALG00000035760	5.53686	-0.271159	-2.27883	0.045855	0.501579	LENG8	leukocyte receptor cluster member 8 [Source:NCBI gene;Acc:101748015]	KZ626836.1
ENSGALG00000002023	3.74596	-0.349079	-2.27465	0.0461821	0.50226	PIGO	phosphatidylinositol glycan anchor biosynthesis class O [Source:HGNC Symbol;Acc:HGNC:23215]	Z
ENSGALG00000005367	5.08875	0.276377	2.27752	0.0459571	0.50226	MRPS22	mitochondrial ribosomal protein S22 [Source:NCBI gene;Acc:424824]	9
ENSGALG00000005621	1.03455	-1.00279	-2.27052	0.0465076	0.50226	CAMK2A	calcium/calmodulin dependent protein kinase II alpha [Source:NCBI gene;Acc:374175]	13
ENSGALG00000008114	4.48004	0.277884	2.27655	0.0460335	0.50226	SFXN2	sideroflexin 2 [Source:NCBI gene;Acc:423866]	6
ENSGALG00000010323	2.2281	0.471832	2.27129	0.0464466	0.50226	BATF	basic leucine zipper ATF-like transcription factor [Source:NCBI gene;Acc:423364]	5
ENSGALG00000013218	3.36884	0.533043	2.27376	0.0462517	0.50226	C3AR1	complement C3a receptor 1 [Source:NCBI gene;Acc:418198]	1
ENSGALG00000015471	6.04788	0.294078	2.2722	0.046375	0.50226	CCNC	cyclin C [Source:NCBI gene;Acc:421791]	3
ENSGALG00000035636	4.56328	0.284657	2.27253	0.0463488	0.50226	PHYH	phytanoyl-CoA 2-hydroxylase [Source:NCBI gene;Acc:426601]	1
ENSGALG00000038885	3.11641	-0.387213	-2.27159	0.0464228	0.50226	FEZ1	fasciculation and elongation protein zeta 1 [Source:NCBI gene;Acc:425587]	24
ENSGALG00000040397	4.26254	0.379358	2.27079	0.0464862	0.50226	HAUS1	HAUS augmin like complex subunit 1 [Source:NCBI gene;Acc:416380]	Z
ENSGALG00000041790	6.48577	-0.474473	-2.27045	0.0465132	0.50226	SAMD4A	sterile alpha motif domain containing 4A [Source:NCBI gene;Acc:423559]	5
ENSGALG00000045815	0.632004	-1.63331	-2.27588	0.0460854	0.50226			1
ENSGALG00000050577	4.52177	-0.314015	-2.27143	0.0464355	0.50226	GRPEL2	GrpE like 2	mitochondrial [Source:NCBI gene;Acc:768554]	13
ENSGALG00000050946	4.65528	0.876632	2.27592	0.0460828	0.50226		uncharacterized LOC426064 [Source:NCBI gene;Acc:426064]	31
ENSGALG00000051236	-0.648376	-0.914153	-2.27081	0.0464848	0.50226			11
ENSGALG00000053680	-0.197503	1.67275	2.27299	0.0463125	0.50226	HIST1H46L2	histone cluster 1	H4-IV	germinal H4-like 2 [Source:NCBI gene;Acc:100858049]	1
ENSGALG00000011019	4.05658	-0.374212	-2.2688	0.0466437	0.502267	ROR1	receptor tyrosine kinase like orphan receptor 1 [Source:NCBI gene;Acc:395179]	8
ENSGALG00000016509	3.99595	-0.370783	-2.26856	0.0466628	0.502267	IFT172	intraflagellar transport 172 [Source:NCBI gene;Acc:421983]	3
ENSGALG00000026518	4.17164	0.992349	2.26941	0.046595	0.502267	RUNDC3A	RUN domain containing 3A [Source:NCBI gene;Acc:100858314]	27
ENSGALG00000044935	3.50682	1.91625	2.26988	0.0465583	0.502267			2
ENSGALG00000039356	0.770914	-1.23226	-2.26714	0.0467758	0.503082	HEPACAM	hepatic and glial cell adhesion molecule [Source:NCBI gene;Acc:428234]	24
ENSGALG00000043283	3.04449	-1.19143	-2.26661	0.0468176	0.50313	LGI2	leucine rich repeat LGI family member 2 [Source:NCBI gene;Acc:422809]	4
ENSGALG00000047547	0.904107	-0.694928	-2.26611	0.046857	0.503153			2
ENSGALG00000000104	2.01828	-0.430003	-2.261	0.0472662	0.503535		cryptochrome 4 [Source:NCBI gene;Acc:395100]	26
ENSGALG00000004280	-0.44485	1.20313	2.26175	0.0472061	0.503535			5
ENSGALG00000008469	5.42664	-0.329624	-2.2611	0.0472581	0.503535		serine peptidase inhibitor	Kunitz type 1 [Source:NCBI gene;Acc:423206]	5
ENSGALG00000011132	5.54341	-0.266385	-2.25992	0.0473527	0.503535	RBMS1	RNA binding motif single stranded interacting protein 1 [Source:NCBI gene;Acc:395880]	7
ENSGALG00000011835	-0.0641592	-0.775462	-2.26214	0.0471747	0.503535	FGF2	fibroblast growth factor 2 [Source:NCBI gene;Acc:396413]	4
ENSGALG00000018874	4.41576	0.275772	2.26032	0.0473204	0.503535	SNX24	sorting nexin 24 [Source:NCBI gene;Acc:426798]	Z
ENSGALG00000026080	7.27679	1.09027	2.25961	0.0473779	0.503535	OMD	osteomodulin [Source:NCBI gene;Acc:101747586]	12
ENSGALG00000029572	4.73822	0.330574	2.26403	0.0470237	0.503535	TOP1MT	DNA topoisomerase I mitochondrial [Source:NCBI gene;Acc:408025]	2
ENSGALG00000031895	6.23476	-0.605346	-2.26343	0.0470714	0.503535	SDK2	sidekick cell adhesion molecule 2 [Source:NCBI gene;Acc:395215]	18
ENSGALG00000036355	6.35764	0.685507	2.26081	0.047281	0.503535	C7orf73	chromosome 7 open reading frame 73 [Source:NCBI gene;Acc:418128]	1
ENSGALG00000043185	9.0993	-0.825219	-2.26254	0.0471424	0.503535	MATN1	matrilin 1	cartilage matrix protein [Source:NCBI gene;Acc:396505]	23
ENSGALG00000044763	0.592584	1.55557	2.26229	0.0471626	0.503535	GPR82	G protein-coupled receptor 82 [Source:NCBI gene;Acc:101750076]	1
ENSGALG00000052835	-0.46412	-1.03469	-2.26279	0.0471221	0.503535			4
ENSGALG00000000836	3.17203	0.470297	2.2314	0.0497018	0.503647	RFX5	regulatory factor X5 [Source:HGNC Symbol;Acc:HGNC:9986]	25
ENSGALG00000001149	2.17248	0.534268	2.25363	0.0478617	0.503647	ADGRG5	adhesion G protein-coupled receptor G5 [Source:NCBI gene;Acc:415634]	11
ENSGALG00000001256	4.33697	0.47387	2.22765	0.0500185	0.503647	NLRC5	NLR family CARD domain containing 5 [Source:NCBI gene;Acc:100857413]	11
ENSGALG00000001948	5.84917	-0.26261	-2.22566	0.0501882	0.503647		scaffold attachment factor B2 [Source:NCBI gene;Acc:427046]	28
ENSGALG00000002066	8.23351	0.329609	2.24921	0.0482222	0.503647	NCOA4	nuclear receptor coactivator 4 [Source:NCBI gene;Acc:423615]	6
ENSGALG00000002090	5.78007	-0.286931	-2.22951	0.0498617	0.503647	GPSM2	G-protein signaling modulator 2 [Source:NCBI gene;Acc:424342]	8
ENSGALG00000002714	-0.58223	-0.841552	-2.24374	0.048672	0.503647	TMEM132C	transmembrane protein 132C [Source:NCBI gene;Acc:416809]	15
ENSGALG00000003168	4.42263	-0.39671	-2.25277	0.0479316	0.503647	MTMR12	myotubularin related protein 12 [Source:NCBI gene;Acc:427423]	Z
ENSGALG00000003293	6.82843	-0.220593	-2.24029	0.0489574	0.503647	MBTPS1	membrane bound transcription factor peptidase	site 1 [Source:NCBI gene;Acc:415704]	11
ENSGALG00000003354	-0.260651	-0.780963	-2.25834	0.0474801	0.503647	KCNH4	potassium voltage-gated channel subfamily H member 4 [Source:NCBI gene;Acc:772091]	27
ENSGALG00000004252	3.4607	0.56731	2.24711	0.0483946	0.503647		cathepsin L1-like [Source:NCBI gene;Acc:420160]	28
ENSGALG00000004519	4.89218	-0.289719	-2.24365	0.0486796	0.503647	TRPV2	transient receptor potential cation channel subfamily V member 2 [Source:NCBI gene;Acc:417603]	19
ENSGALG00000004557	5.46443	0.217583	2.25671	0.0476114	0.503647	WIPI2	WD repeat domain	phosphoinositide interacting 2 [Source:NCBI gene;Acc:416481]	14
ENSGALG00000004637	5.09432	0.574913	2.2251	0.0502354	0.503647		sedoheptulokinase [Source:NCBI gene;Acc:417607]	19
ENSGALG00000005181	7.15381	-0.321252	-2.25626	0.0476479	0.503647		SEC24 homolog C	COPII coat complex component [Source:NCBI gene;Acc:423742]	6
ENSGALG00000005206	5.71797	-0.322315	-2.24135	0.0488698	0.503647	ACSL3	acyl-CoA synthetase long chain family member 3 [Source:NCBI gene;Acc:424810]	9
ENSGALG00000006229	5.78459	0.358993	2.24166	0.0488438	0.503647		T-lymphocyte surface antigen Ly-9-like [Source:NCBI gene;Acc:100857714]	25
ENSGALG00000006921	5.12695	0.222635	2.25447	0.0477933	0.503647	DRG1	developmentally regulated GTP binding protein 1 [Source:NCBI gene;Acc:416962]	15
ENSGALG00000007269	2.25935	-0.672786	-2.23313	0.0495563	0.503647	GABRA3	gamma-aminobutyric acid type A receptor alpha3 subunit [Source:NCBI gene;Acc:422289]	4
ENSGALG00000007381	6.16193	-0.315576	-2.22826	0.049967	0.503647			5
ENSGALG00000007867	3.82269	0.435094	2.2282	0.0499722	0.503647	SLC9A5	solute carrier family 9 member A5 [Source:NCBI gene;Acc:425403]	11
ENSGALG00000008234	3.23692	0.320171	2.23111	0.049726	0.503647	ORC2	origin recognition complex subunit 2 [Source:NCBI gene;Acc:424077]	7
ENSGALG00000008293	5.24065	-0.378301	-2.24971	0.0481814	0.503647	SH3PXD2A	SH3 and PX domains 2A [Source:NCBI gene;Acc:423876]	6
ENSGALG00000008498	-0.463785	1.12507	2.25836	0.0474788	0.503647	MALRD1	MAM and LDL receptor class A domain containing 1 [Source:NCBI gene;Acc:420512]	2
ENSGALG00000009085	5.16709	-0.247061	-2.22433	0.0503013	0.503647	MTMR1	myotubularin related protein 1 [Source:NCBI gene;Acc:422387]	4
ENSGALG00000009369	6.55871	0.401482	2.23926	0.049043	0.503647	PRDX3	peroxiredoxin 3 [Source:NCBI gene;Acc:428986]	6
ENSGALG00000009554	5.33286	-0.265607	-2.22657	0.0501109	0.503647	KLHL2	kelch like family member 2 [Source:NCBI gene;Acc:422422]	4
ENSGALG00000009592	6.84663	0.296427	2.22533	0.0502165	0.503647	SRP14	signal recognition particle 14 [Source:NCBI gene;Acc:423284]	5
ENSGALG00000009807	4.17798	-0.386439	-2.23404	0.0494794	0.503647	FLVCR1	feline leukemia virus subgroup C cellular receptor 1 [Source:NCBI gene;Acc:421365]	3
ENSGALG00000011657	6.85191	0.251585	2.22888	0.0499143	0.503647	EAF2	ELL associated factor 2 [Source:NCBI gene;Acc:424243]	7
ENSGALG00000011834	3.37299	-0.494273	-2.25188	0.0480038	0.503647	NUDT6	nudix hydrolase 6 [Source:HGNC Symbol;Acc:HGNC:8053]	4
ENSGALG00000012178	3.7453	-0.316801	-2.25485	0.0477626	0.503647	PDGFB	platelet derived growth factor subunit B [Source:NCBI gene;Acc:374128]	1
ENSGALG00000012481	3.78302	0.627677	2.24906	0.048234	0.503647	TNFAIP6	TNF alpha induced protein 6 [Source:NCBI gene;Acc:424315]	7
ENSGALG00000012710	2.92169	-0.474788	-2.2297	0.0498457	0.503647	NCS1	neuronal calcium sensor 1 [Source:NCBI gene;Acc:396336]	17
ENSGALG00000012747	4.65853	-0.350399	-2.23168	0.0496786	0.503647	NEDD9	neural precursor cell expressed	developmentally down-regulated 9 [Source:NCBI gene;Acc:395736]	2
ENSGALG00000013956	3.88592	0.673526	2.24664	0.048433	0.503647	MYB	MYB proto-oncogene	transcription factor [Source:NCBI gene;Acc:396244]	3
ENSGALG00000014297	4.70757	0.684599	2.22576	0.0501796	0.503647	IRF7	interferon regulatory factor 7 [Source:NCBI gene;Acc:396330]	5
ENSGALG00000014362	2.08765	-0.465262	-2.22843	0.0499531	0.503647	CD86	CD86 molecule [Source:NCBI gene;Acc:427944]	1
ENSGALG00000014855	5.57041	-0.343133	-2.23258	0.0496024	0.503647	GHR	growth hormone receptor [Source:NCBI gene;Acc:408184]	Z
ENSGALG00000015551	2.0777	0.585424	2.22572	0.050183	0.503647	GRIN3A	glutamate ionotropic receptor NMDA type subunit 3A [Source:NCBI gene;Acc:769001]	Z
ENSGALG00000016507	2.25129	0.485041	2.2523	0.0479699	0.503647	FNDC4	fibronectin type III domain containing 4 [Source:NCBI gene;Acc:421981]	3
ENSGALG00000016669	7.92554	0.859246	2.24699	0.0484038	0.503647	DEFB4A	defensin beta 4A [Source:NCBI gene;Acc:395840]	3
ENSGALG00000016927	2.06664	-0.476237	-2.23375	0.0495039	0.503647	KLF5	Kruppel like factor 5 [Source:NCBI gene;Acc:418818]	1
ENSGALG00000019795	4.39614	0.287444	2.23756	0.0491849	0.503647		uncharacterized LOC100857706 [Source:NCBI gene;Acc:100857706]	18
ENSGALG00000024490	3.51016	0.993309	2.24005	0.0489777	0.503647		transmembrane protein 156 [Source:NCBI gene;Acc:426317]	4
ENSGALG00000026081	5.47936	0.660651	2.25167	0.0480211	0.503647	RBM38	RNA binding motif protein 38 [Source:NCBI gene;Acc:768866]	20
ENSGALG00000027330	4.5963	-0.365585	-2.23804	0.0491447	0.503647	SYNPO	synaptopodin [Source:NCBI gene;Acc:770421]	13
ENSGALG00000027632	3.49741	0.381414	2.24554	0.0485235	0.503647	ACYP2	acylphosphatase 2 [Source:NCBI gene;Acc:421217]	3
ENSGALG00000027925	3.51551	-0.439249	-2.24232	0.0487894	0.503647	HOXA3	homeobox A3 [Source:NCBI gene;Acc:395231]	2
ENSGALG00000029892	6.41948	0.419175	2.23137	0.0497041	0.503647	LMO2	LIM domain only 2 [Source:NCBI gene;Acc:374129]	5
ENSGALG00000030261	5.43966	0.488731	2.24609	0.0484782	0.503647	SMIM12	small integral membrane protein 12 [Source:NCBI gene;Acc:100858028]	23
ENSGALG00000031430	3.2722	-0.68968	-2.23064	0.0497655	0.503647		selectin E [Source:NCBI gene;Acc:424402]	8
ENSGALG00000031851	4.0316	-0.297271	-2.23943	0.0490292	0.503647	TENT4B	poly(A) RNA polymerase D5	non-canonical [Source:NCBI gene;Acc:415733]	11
ENSGALG00000031983	6.9228	0.624769	2.25558	0.0477028	0.503647	MPHOSPH6	M-phase phosphoprotein 6 [Source:NCBI gene;Acc:415811]	11
ENSGALG00000032419	5.32207	-0.271335	-2.25693	0.0475943	0.503647	STARD8	StAR related lipid transfer domain containing 8 [Source:HGNC Symbol;Acc:HGNC:19161]	4
ENSGALG00000032803	2.91308	-0.410312	-2.23936	0.0490352	0.503647		proto-oncogene Mas-like [Source:NCBI gene;Acc:776507]	5
ENSGALG00000032841	1.76442	-0.53424	-2.23176	0.0496716	0.503647			2
ENSGALG00000033663	9.04049	0.297003	2.22441	0.0502947	0.503647	ATP6V1B2	ATPase H+ transporting V1 subunit B2 [Source:NCBI gene;Acc:395497]	22
ENSGALG00000035419	3.27391	-0.905188	-2.23859	0.0490993	0.503647	CDON	cell adhesion associated	oncogene regulated [Source:NCBI gene;Acc:419710]	24
ENSGALG00000035453	4.22222	0.375454	2.22791	0.049997	0.503647		retinitis pigmentosa 9 (autosomal dominant) [Source:NCBI gene;Acc:420747]	2
ENSGALG00000037780	5.54766	-0.541021	-2.22576	0.0501792	0.503647	PMEPA1	prostate transmembrane protein	androgen induced 1 [Source:NCBI gene;Acc:428166]	20
ENSGALG00000037896	3.06312	-0.42523	-2.23746	0.0491935	0.503647			32
ENSGALG00000038684	4.15582	0.394185	2.23592	0.0493225	0.503647	EEFSEC	eukaryotic elongation factor	selenocysteine-tRNA specific [Source:NCBI gene;Acc:416021]	12
ENSGALG00000040549	2.32447	-0.445651	-2.24375	0.0486711	0.503647	HTR7	5-hydroxytryptamine (serotonin) receptor 7	adenylate cyclase-coupled [Source:NCBI gene;Acc:423794]	6
ENSGALG00000040969	4.23584	0.275711	2.24191	0.0488233	0.503647	PTP4A3	protein tyrosine phosphatase type IVA	member 3 [Source:NCBI gene;Acc:768713]	2
ENSGALG00000041226	5.87012	0.236266	2.22707	0.0500678	0.503647		Ras related GTP binding A [Source:NCBI gene;Acc:422311]	4
ENSGALG00000041251	2.03948	-0.487842	-2.25072	0.0480984	0.503647	HDAC10	histone deacetylase 10 [Source:HGNC Symbol;Acc:HGNC:18128]	1
ENSGALG00000042153	1.03528	0.94435	2.23243	0.049615	0.503647	APC2	APC2	WNT signaling pathway regulator [Source:NCBI gene;Acc:429363]	28
ENSGALG00000043596	5.3699	-0.439528	-2.23855	0.0491025	0.503647	SNED1	sushi	nidogen and EGF like domains 1 [Source:NCBI gene;Acc:424846]	9
ENSGALG00000045085	6.7376	2.07987	2.2474	0.0483701	0.503647	IFIT5	interferon induced protein with tetratricopeptide repeats 5 [Source:NCBI gene;Acc:423790]	6
ENSGALG00000048091	4.32061	0.621996	2.23218	0.0496361	0.503647		interferon-induced protein 35 [Source:NCBI gene;Acc:420011]	27
ENSGALG00000048306	0.211662	-0.786905	-2.2428	0.0487499	0.503647			26
ENSGALG00000049618	1.45656	-0.694967	-2.25032	0.0481314	0.503647		transmembrane protein 107 [Source:NCBI gene;Acc:107050552]	18
ENSGALG00000049657	0.200314	-0.795192	-2.23911	0.0490562	0.503647			3
ENSGALG00000050081	-0.34004	0.760772	2.23886	0.0490764	0.503647			3
ENSGALG00000052844	3.55941	-0.2997	-2.23925	0.0490445	0.503647			30
ENSGALG00000053098	-0.244262	-0.727773	-2.22926	0.0498828	0.503647			11
ENSGALG00000054430	3.42402	-0.366699	-2.22691	0.0500819	0.503647	GLYCTK	glycerate kinase [Source:NCBI gene;Acc:427577]	12
ENSGALG00000008609	7.51231	-0.355112	-2.22277	0.0504343	0.504241	PTK7	protein tyrosine kinase 7 (inactive) [Source:NCBI gene;Acc:421257]	3
ENSGALG00000044226	1.97038	0.721408	2.22232	0.0504727	0.504241		C-type lectin domain family 17 member A [Source:NCBI gene;Acc:426106]	30
ENSGALG00000046098	2.77495	0.69685	2.22255	0.050453	0.504241		ubiquitin-conjugating enzyme E2L 6 [Source:NCBI gene;Acc:100858073]	5
ENSGALG00000035845	4.49895	-0.696729	-2.22041	0.0506364	0.505502	JPH1	junctophilin 1 [Source:NCBI gene;Acc:420190]	2
ENSGALG00000004771	5.0039	0.64046	2.21984	0.0506857	0.50562	C1QB	complement C1q B chain [Source:NCBI gene;Acc:428197]	21
ENSGALG00000001231	4.59251	0.370857	2.21255	0.0513161	0.505924	SAMHD1	SAM and HD domain containing deoxynucleoside triphosphate triphosphohydrolase 1 [Source:NCBI gene;Acc:419125]	20
ENSGALG00000003323	4.05217	0.463417	2.21144	0.0514119	0.505924	NECAB2	N-terminal EF-hand calcium binding protein 2 [Source:NCBI gene;Acc:415705]	11
ENSGALG00000005057	6.25373	0.439521	2.21268	0.0513042	0.505924	ADK	adenosine kinase [Source:NCBI gene;Acc:423735]	6
ENSGALG00000005086	6.00854	-0.435283	-2.21662	0.050963	0.505924	PLAU	plasminogen activator	urokinase [Source:NCBI gene;Acc:396424]	6
ENSGALG00000005800	6.56399	0.207543	2.21558	0.0510528	0.505924	DCAF12L2	DDB1 and CUL4 associated factor 12 like 2 [Source:NCBI gene;Acc:427396]	Z
ENSGALG00000005806	2.96367	0.510555	2.21023	0.0515179	0.505924	KIF24	kinesin family member 24 [Source:NCBI gene;Acc:427398]	Z
ENSGALG00000006560	2.5153	-0.790045	-2.21434	0.0511601	0.505924	SEMA3A	semaphorin 3A [Source:NCBI gene;Acc:395825]	1
ENSGALG00000008722	3.28197	0.386451	2.21416	0.0511762	0.505924	MCOLN2	mucolipin 2 [Source:NCBI gene;Acc:424531]	8
ENSGALG00000008763	3.18708	-0.933398	-2.21587	0.0510281	0.505924	SSX2IP	SSX family member 2 interacting protein [Source:NCBI gene;Acc:424532]	8
ENSGALG00000009890	4.52388	0.44956	2.21787	0.0508548	0.505924	MRPS10	mitochondrial ribosomal protein S10 [Source:NCBI gene;Acc:421385]	3
ENSGALG00000012311	8.21672	0.340559	2.21782	0.0508592	0.505924	UBE2D3	ubiquitin conjugating enzyme E2 D3 [Source:NCBI gene;Acc:422713]	4
ENSGALG00000012872	1.77449	0.583059	2.21351	0.0512327	0.505924	SERPINB11	serpin family B member 12 [Source:NCBI gene;Acc:420899]	2
ENSGALG00000013874	4.59314	0.243004	2.21732	0.0509023	0.505924	PEX7	peroxisomal biogenesis factor 7 [Source:NCBI gene;Acc:421687]	3
ENSGALG00000015069	4.97765	-0.556208	-2.21584	0.0510302	0.505924	B4GALT4	beta-1	4-galactosyltransferase 4 [Source:NCBI gene;Acc:418341]	1
ENSGALG00000026241	0.944831	-0.670901	-2.21088	0.0514614	0.505924	GRIN3B	glutamate ionotropic receptor NMDA type subunit 3B [Source:NCBI gene;Acc:429171]	28
ENSGALG00000027056	3.17216	0.789112	2.20996	0.0515415	0.505924		electron transfer flavoprotein beta subunit lysine methyltransferase [Source:NCBI gene;Acc:418138]	1
ENSGALG00000029244	6.11676	0.377213	2.21872	0.0507817	0.505924	SMAP2	small ArfGAP2 [Source:NCBI gene;Acc:419641]	23
ENSGALG00000030673	7.9359	-0.459984	-2.21234	0.0513336	0.505924			5
ENSGALG00000030776	0.427807	1.09653	2.21014	0.0515258	0.505924	METTL7A	methyltransferase like 7A [Source:NCBI gene;Acc:426871]	33
ENSGALG00000036976	4.50393	0.346992	2.21509	0.0510953	0.505924	DALRD3	DALR anticodon binding domain containing 3 [Source:NCBI gene;Acc:416059]	12
ENSGALG00000041010	5.43448	0.330285	2.21063	0.0514831	0.505924	WBP1L	WW domain binding protein 1-like [Source:NCBI gene;Acc:423867]	6
ENSGALG00000042836	1.80475	-0.501359	-2.21363	0.0512215	0.505924	KCNH2	potassium voltage-gated channel subfamily H member 2 [Source:NCBI gene;Acc:100858122]	2
ENSGALG00000009002	4.56442	-0.36455	-2.20899	0.0516264	0.506021	CPED1	cadherin-like and PC-esterase domain containing 1 [Source:NCBI gene;Acc:417761]	1
ENSGALG00000015556	4.92199	-0.380733	-2.20919	0.0516086	0.506021	AFAP1	actin filament associated protein 1 [Source:NCBI gene;Acc:374034]	4
ENSGALG00000003562	4.65969	-1.08209	-2.20787	0.0517241	0.506243	NPTX2	neuronal pentraxin 2 [Source:NCBI gene;Acc:416438]	14
ENSGALG00000012177	2.72219	-0.398905	-2.20805	0.0517087	0.506243		NCK associated protein 5 [Source:NCBI gene;Acc:424283]	7
ENSGALG00000000558	5.437	0.596988	2.19725	0.0526626	0.506593	SLC1A6	solute carrier family 1 (high affinity aspartate/glutamate transporter)	member 6 [Source:NCBI gene;Acc:420057]	28
ENSGALG00000002974	0.43437	0.737789	2.19823	0.0525752	0.506593	SPHKAP	SPHK1 interactor	AKAP domain containing [Source:NCBI gene;Acc:424789]	9
ENSGALG00000004302	7.27068	0.232016	2.201	0.0523296	0.506593	NDUFA10	NADH:ubiquinone oxidoreductase subunit A10 [Source:NCBI gene;Acc:424032]	7
ENSGALG00000005739	6.89413	-0.943323	-2.20258	0.0521895	0.506593	SCD	stearoyl-CoA desaturase [Source:NCBI gene;Acc:395706]	6
ENSGALG00000007924	6.0751	0.262643	2.20675	0.0518223	0.506593	STK17B	serine/threonine kinase 17b [Source:NCBI gene;Acc:424049]	7
ENSGALG00000009993	4.10787	0.323466	2.19979	0.0524368	0.506593	MED8	mediator complex subunit 8 [Source:NCBI gene;Acc:424565]	8
ENSGALG00000013632	5.15251	0.439667	2.19646	0.0527333	0.506593	ACOT13	acyl-CoA thioesterase 13 [Source:NCBI gene;Acc:421006]	2
ENSGALG00000016173	2.95666	0.689258	2.20208	0.0522341	0.506593	UBASH3A	ubiquitin associated and SH3 domain containing A [Source:NCBI gene;Acc:418535]	1
ENSGALG00000016205	4.81149	0.506433	2.20085	0.0523426	0.506593	PDXK	pyridoxal (pyridoxine	vitamin B6) kinase [Source:NCBI gene;Acc:418549]	1
ENSGALG00000016321	5.46412	-0.305223	-2.20394	0.0520697	0.506593	CILK1	intestinal cell kinase [Source:NCBI gene;Acc:421896]	3
ENSGALG00000016690	0.768215	1.02746	2.19872	0.0525318	0.506593	CYP2AC1	cytochrome P450	family 2	subfamily AC	polypeptide 1 [Source:NCBI gene;Acc:422046]	3
ENSGALG00000021525	4.92452	-0.39371	-2.19642	0.0527364	0.506593	ISLR	immunoglobulin superfamily containing leucine rich repeat [Source:NCBI gene;Acc:769957]	10
ENSGALG00000026005	6.11971	-0.264574	-2.20615	0.0518749	0.506593	DIO2	deiodinase	iodothyronine type II [Source:NCBI gene;Acc:373903]	5
ENSGALG00000027070	9.47771	-0.420185	-2.19853	0.0525484	0.506593	TIMP2	TIMP metallopeptidase inhibitor 2 [Source:NCBI gene;Acc:374178]	18
ENSGALG00000028142	2.91025	0.775963	2.20215	0.0522278	0.506593	HACD4	3-hydroxyacyl-CoA dehydratase 4 [Source:NCBI gene;Acc:427232]	Z
ENSGALG00000031786	3.84939	0.898343	2.1971	0.0526765	0.506593	BLVRA	biliverdin reductase A [Source:NCBI gene;Acc:420776]	2
ENSGALG00000031966	4.17811	0.30795	2.2013	0.0523027	0.506593	TIMM9	translocase of inner mitochondrial membrane 9 [Source:NCBI gene;Acc:100859762]	5
ENSGALG00000032577	2.54541	-0.481592	-2.19759	0.0526328	0.506593	MECOM	MDS1 and EVI1 complex locus [Source:NCBI gene;Acc:424997]	9
ENSGALG00000034118	3.69263	-0.441348	-2.20507	0.05197	0.506593	SOX18	SRY-box 18 [Source:NCBI gene;Acc:374200]	20
ENSGALG00000039575	6.21305	-0.286284	-2.20647	0.0518473	0.506593	AMD1	adenosylmethionine decarboxylase 1 [Source:NCBI gene;Acc:421755]	3
ENSGALG00000040902	5.88228	-0.257019	-2.20508	0.0519694	0.506593	SACM1L	SAC1 suppressor of actin mutations 1-like (yeast) [Source:NCBI gene;Acc:420700]	2
ENSGALG00000041267	5.23879	-0.293015	-2.19645	0.0527344	0.506593	BMI1	BMI1 proto-oncogene	polycomb ring finger [Source:NCBI gene;Acc:493647]	2
ENSGALG00000042371	4.18869	-0.324868	-2.20023	0.0523974	0.506593	ANO10	anoctamin 10 [Source:NCBI gene;Acc:420674]	2
ENSGALG00000043768	9.77756	0.582225	2.1987	0.0525334	0.506593	MT-ND2	NADH-ubiquinone oxidoreductase chain 2 [Source:UniProtKB/Swiss-Prot;Acc:P18937]	MT
ENSGALG00000045127	1.04392	-0.508152	-2.19744	0.0526463	0.506593			7
ENSGALG00000048018	-0.6935	0.97336	2.20059	0.0523655	0.506593			3
ENSGALG00000009293	5.38553	0.268951	2.19545	0.0528235	0.506774	CHN1	chimerin 1 [Source:NCBI gene;Acc:429021]	7
ENSGALG00000016988	3.9315	0.386023	2.19537	0.0528305	0.506774	RUBCNL	RUN and cysteine rich domain containing beclin 1 interacting protein like [Source:NCBI gene;Acc:418854]	1
ENSGALG00000010110	4.29705	0.30782	2.19232	0.0531039	0.507295	TMEM53	transmembrane protein 53 [Source:NCBI gene;Acc:424581]	8
ENSGALG00000010820	3.64375	0.689641	2.19225	0.0531105	0.507295	CHGA	chromogranin A [Source:NCBI gene;Acc:423420]	5
ENSGALG00000012849	5.66102	-0.300785	-2.19319	0.0530259	0.507295	SLC37A3	solute carrier family 37 member 3 [Source:NCBI gene;Acc:418112]	1
ENSGALG00000015409	7.48039	0.402771	2.19259	0.05308	0.507295	PROS1	protein S (alpha) [Source:NCBI gene;Acc:418430]	1
ENSGALG00000016278	4.0667	0.255692	2.19389	0.0529633	0.507295	PRIM2	primase (DNA) subunit 2 [Source:NCBI gene;Acc:421878]	3
ENSGALG00000033090	5.44846	0.359861	2.19241	0.0530962	0.507295	VDR	vitamin D (1	25- dihydroxyvitamin D3) receptor [Source:NCBI gene;Acc:395988]	33
ENSGALG00000002232	5.31964	-0.419389	-2.19108	0.053216	0.507471	RERE	arginine-glutamic acid dipeptide repeats [Source:NCBI gene;Acc:419435]	21
ENSGALG00000002579	2.42527	-0.537321	-2.19101	0.0532219	0.507471	RIMBP2	RIMS binding protein 2 [Source:NCBI gene;Acc:374105]	15
ENSGALG00000048814	4.40362	-0.390204	-2.19079	0.0532418	0.507471			16
ENSGALG00000002358	4.28602	-0.866082	-2.18466	0.0537969	0.507552	CDO1	cysteine dioxygenase type 1 [Source:NCBI gene;Acc:427391]	Z
ENSGALG00000004239	7.66913	0.667692	2.18681	0.0536011	0.507552	IFITM5	interferon induced transmembrane protein 5 [Source:NCBI gene;Acc:422992]	5
ENSGALG00000004804	5.65002	0.954857	2.18782	0.0535101	0.507552		transglutaminase 3 [Source:NCBI gene;Acc:419215]	20
ENSGALG00000005292	-0.733347	1.30725	2.18614	0.0536621	0.507552	KLHL40	kelch like family member 40 [Source:NCBI gene;Acc:420389]	2
ENSGALG00000007174	0.168968	-0.873179	-2.18678	0.0536038	0.507552	TNFSF15	tumor necrosis factor superfamily member 15 [Source:NCBI gene;Acc:417247]	17
ENSGALG00000008595	6.18672	0.208461	2.18495	0.0537703	0.507552	RTF1	RTF1 homolog	Paf1/RNA polymerase II complex component [Source:NCBI gene;Acc:423215]	5
ENSGALG00000009365	6.45344	-0.527294	-2.18524	0.0537442	0.507552	CYP51A1	cytochrome P450 family 51 subfamily A member 1 [Source:NCBI gene;Acc:420548]	2
ENSGALG00000009549	7.6033	0.225633	2.18933	0.0533734	0.507552	KPNA4	karyopherin subunit alpha 4 [Source:NCBI gene;Acc:425012]	9
ENSGALG00000013063	-0.00594927	-0.743466	-2.18526	0.053742	0.507552	SRD5A1	steroid-5-alpha-reductase	alpha polypeptide 1 (3-oxo-5 alpha-steroid delta 4-dehydrogenase alpha 1) [Source:NCBI gene;Acc:770453]	2
ENSGALG00000016758	3.58447	0.324797	2.18763	0.0535272	0.507552	LIPT1	lipoyltransferase 1 [Source:NCBI gene;Acc:418697]	1
ENSGALG00000017201	3.89062	0.393786	2.18446	0.0538147	0.507552	CEP57	centrosomal protein 57 [Source:NCBI gene;Acc:418993]	1
ENSGALG00000029935	-0.541148	-0.982687	-2.1858	0.0536931	0.507552		erythrocyte membrane protein band 4.1 like 4B [Source:NCBI gene;Acc:420962]	2
ENSGALG00000032847	7.6424	0.386564	2.18787	0.053505	0.507552	HDGF	hepatoma-derived growth factor [Source:NCBI gene;Acc:776936]	25
ENSGALG00000049122	3.71671	1.1451	2.18496	0.0537695	0.507552			2
ENSGALG00000050882	4.36658	0.390767	2.18545	0.0537247	0.507552			11
ENSGALG00000007416	5.45181	0.510272	2.1832	0.0539294	0.508278	CD3E	CD3e molecule [Source:NCBI gene;Acc:396062]	24
ENSGALG00000002371	4.43532	-0.480023	-2.18169	0.0540679	0.508425	RUSC2	RUN and SH3 domain containing 2 [Source:NCBI gene;Acc:431657]	Z
ENSGALG00000005597	8.1649	-0.305879	-2.18138	0.0540958	0.508425	CNN3	calponin 3 [Source:NCBI gene;Acc:424485]	8
ENSGALG00000008867	5.61083	0.318779	2.18142	0.0540927	0.508425	COMMD5	COMM domain containing 5 [Source:NCBI gene;Acc:422376]	4
ENSGALG00000034616	3.61991	-1.1376	-2.18195	0.0540442	0.508425	INHBA	inhibin beta A subunit [Source:NCBI gene;Acc:396361]	2
ENSGALG00000000208	4.7092	-0.295901	-2.18034	0.0541912	0.50854	MCC	mutated in colorectal cancers [Source:NCBI gene;Acc:415603]	Z
ENSGALG00000003709	4.05739	0.487293	2.18001	0.0542212	0.50854	PLAT	plasminogen activator	tissue [Source:NCBI gene;Acc:426791]	22
ENSGALG00000010663	4.17397	0.528149	2.18073	0.0541554	0.50854	TTC8	tetratricopeptide repeat domain 8 [Source:NCBI gene;Acc:423401]	5
ENSGALG00000034560	5.17836	-0.266247	-2.17911	0.0543039	0.508755	SCARF2	scavenger receptor class F	member 2 [Source:NCBI gene;Acc:772263]	15
ENSGALG00000036730	5.28382	0.445427	2.17894	0.0543195	0.508755	MRPS35	mitochondrial ribosomal protein S35 [Source:NCBI gene;Acc:419048]	1
ENSGALG00000002329	0.765001	0.705722	2.17795	0.0544104	0.509252	CCL1	C-C motif chemokine ligand 1 [Source:NCBI gene;Acc:395552]	19
ENSGALG00000010117	2.33739	0.763973	2.17677	0.0545189	0.509561	SLC25A21	solute carrier family 25 member 21 [Source:NCBI gene;Acc:423330]	5
ENSGALG00000012644	0.676675	-0.731432	-2.1769	0.0545077	0.509561	FOXD1	forkhead box D1 [Source:NCBI gene;Acc:396109]	Z
ENSGALG00000006520	4.45752	-0.397262	-2.17419	0.0547577	0.510397	MYH11	myosin	heavy chain 11	smooth muscle [Source:NCBI gene;Acc:396211]	14
ENSGALG00000016433	9.22603	0.229983	2.17396	0.0547793	0.510397	YWHAQ	tyrosine 3-monooxygenase/tryptophan 5-monooxygenase activation protein theta [Source:NCBI gene;Acc:421932]	3
ENSGALG00000029485	4.72457	0.484831	2.17414	0.0547623	0.510397		tyrosine-protein phosphatase non-receptor type substrate 1-like [Source:NCBI gene;Acc:771545]	20
ENSGALG00000040030	5.58554	-0.409193	-2.17376	0.0547976	0.510397	PHLDB1	pleckstrin homology like domain family B member 1 [Source:NCBI gene;Acc:419790]	24
ENSGALG00000049181	5.3954	-0.246597	-2.17438	0.0547396	0.510397	CHST14	carbohydrate sulfotransferase 14 [Source:HGNC Symbol;Acc:HGNC:24464]	5
ENSGALG00000003722	4.96086	0.34625	2.17249	0.0549153	0.510596	THG1L	tRNA-histidine guanylyltransferase 1 like [Source:NCBI gene;Acc:416242]	13
ENSGALG00000007528	6.22088	-0.256058	-2.1719	0.0549703	0.510596	TCERG1	transcription elongation regulator 1 [Source:NCBI gene;Acc:416349]	13
ENSGALG00000011735	2.08255	0.644965	2.17211	0.0549502	0.510596	XCR1	X-C motif chemokine receptor 1 [Source:NCBI gene;Acc:428452]	2
ENSGALG00000015079	1.91491	-0.760646	-2.17253	0.0549118	0.510596	UPK1B	uroplakin 1B [Source:NCBI gene;Acc:418345]	1
ENSGALG00000004250	6.51037	-0.597899	-2.17072	0.0550795	0.510682		beta-1	4-N-acetyl-galactosaminyltransferase 4 [Source:NCBI gene;Acc:770601]	5
ENSGALG00000005421	-0.635465	-0.824139	-2.1705	0.0550997	0.510682		testis expressed 2-like [Source:NCBI gene;Acc:416541]	14
ENSGALG00000007253	4.20455	-0.357614	-2.17128	0.0550279	0.510682	IL1RAP	interleukin 1 receptor accessory protein [Source:NCBI gene;Acc:424908]	9
ENSGALG00000028301	5.93336	-0.333873	-2.17017	0.0551311	0.510682		tripartite motif containing 47 [Source:NCBI gene;Acc:770100]	18
ENSGALG00000000243	4.67059	0.309541	2.16821	0.0553137	0.51132	RDM1	RAD52 motif containing 1 [Source:NCBI gene;Acc:395228]	27
ENSGALG00000005567	4.69888	-0.297274	-2.16846	0.0552904	0.51132	MSI2	musashi RNA binding protein 2 [Source:NCBI gene;Acc:417667]	19
ENSGALG00000012703	4.43855	0.257381	2.16888	0.0552508	0.51132	DTNBP1	dystrobrevin binding protein 1 [Source:NCBI gene;Acc:420840]	2
ENSGALG00000016931	4.01648	0.328779	2.16652	0.0554715	0.512428	BORA	bora	aurora kinase A activator [Source:NCBI gene;Acc:769298]	1
ENSGALG00000014615	0.544118	0.76386	2.16588	0.0555315	0.512631	LAMA1	laminin subunit alpha 1 [Source:NCBI gene;Acc:374016]	2
ENSGALG00000043103	2.99484	-0.439429	-2.16504	0.0556111	0.513014	PKNOX2	PBX/knotted 1 homeobox 2 [Source:NCBI gene;Acc:374067]	24
ENSGALG00000009683	5.1426	-0.282414	-2.16442	0.055669	0.513197	NEK1	NIMA related kinase 1 [Source:NCBI gene;Acc:422433]	4
ENSGALG00000007484	6.47606	0.290055	2.16335	0.0557693	0.51342	GOT1	glutamic-oxaloacetic transaminase 1 [Source:NCBI gene;Acc:396261]	6
ENSGALG00000043654	4.57713	0.415934	2.16372	0.0557345	0.51342			27
ENSGALG00000011428	5.90961	0.211863	2.16104	0.0559878	0.514378	AZI2	5-azacytidine induced 2 [Source:NCBI gene;Acc:420660]	2
ENSGALG00000013086	3.61663	0.668211	2.16162	0.0559329	0.514378	IKZF1	IKAROS family zinc finger 1 [Source:NCBI gene;Acc:395974]	2
ENSGALG00000047632	1.53251	-0.433074	-2.1611	0.0559817	0.514378			33
ENSGALG00000002253	3.37261	0.32617	2.15427	0.0566316	0.514554	HEMK1	HemK methyltransferase family member 1 [Source:NCBI gene;Acc:415915]	12
ENSGALG00000002427	5.04221	0.494302	2.15845	0.056233	0.514554	SMIM5	small integral membrane protein 5 [Source:NCBI gene;Acc:770371]	18
ENSGALG00000004246	3.84533	-0.49665	-2.15953	0.0561307	0.514554	SLC6A4	solute carrier family 6 member 4 [Source:NCBI gene;Acc:404747]	19
ENSGALG00000011469	6.39201	0.507266	2.15729	0.0563436	0.514554	IGFBP2	insulin like growth factor binding protein 2 [Source:NCBI gene;Acc:396315]	7
ENSGALG00000013548	3.8084	0.453803	2.15777	0.0562981	0.514554	GZMA	granzyme A [Source:NCBI gene;Acc:395108]	Z
ENSGALG00000023440	5.74542	0.206847	2.15977	0.0561083	0.514554	GABPB1	GA binding protein transcription factor beta subunit 1 [Source:NCBI gene;Acc:415453]	10
ENSGALG00000025864	2.15886	-0.530605	-2.15409	0.0566487	0.514554	WTIP	Wilms tumor 1 interacting protein [Source:NCBI gene;Acc:769595]	11
ENSGALG00000026482	0.0391311	-0.855541	-2.15417	0.056641	0.514554			1
ENSGALG00000026781	2.79623	0.516222	2.15785	0.0562904	0.514554	ALOX5AP	arachidonate 5-lipoxygenase activating protein [Source:NCBI gene;Acc:770904]	1
ENSGALG00000034999	3.97551	-0.465246	-2.15492	0.0565696	0.514554	ZHX1	zinc fingers and homeoboxes 1 [Source:NCBI gene;Acc:420347]	2
ENSGALG00000035635	4.91762	0.229956	2.1604	0.0560488	0.514554	ACVRL1	activin A receptor like type 1 [Source:NCBI gene;Acc:100857446]	33
ENSGALG00000035762	3.11863	0.785925	2.15402	0.0566555	0.514554		protease	serine 57 [Source:NCBI gene;Acc:420096]	28
ENSGALG00000040264	5.4411	-1.16735	-2.15498	0.0565638	0.514554	C9H2ORF82	chromosome 9 open reading frame	human C2orf82 [Source:NCBI gene;Acc:768774]	9
ENSGALG00000042279	3.24762	-0.724364	-2.15589	0.0564766	0.514554	CYP24A1	cytochrome P450 family 24 subfamily A member 1 [Source:NCBI gene;Acc:395827]	20
ENSGALG00000043650	1.3562	0.944136	2.15405	0.056652	0.514554	GFI1	growth factor independent 1 transcriptional repressor [Source:NCBI gene;Acc:429088]	8
ENSGALG00000050253	3.0453	-0.314473	-2.15703	0.0563685	0.514554		DNA polymerase beta-like [Source:NCBI gene;Acc:112530162]	22
ENSGALG00000051459	3.57434	0.376736	2.15906	0.056175	0.514554			22
ENSGALG00000003999	4.41424	-0.483695	-2.15254	0.0567972	0.514631	NAV2	neuron navigator 2 [Source:NCBI gene;Acc:422977]	5
ENSGALG00000008320	7.06568	-0.28711	-2.15337	0.0567175	0.514631	EDEM1	ER degradation enhancing alpha-mannosidase like protein 1 [Source:NCBI gene;Acc:416110]	12
ENSGALG00000014826	4.47869	0.248401	2.15284	0.0567683	0.514631	TTC33	tetratricopeptide repeat domain 33 [Source:NCBI gene;Acc:427184]	Z
ENSGALG00000016881	5.64895	0.341539	2.15234	0.0568166	0.514631	GPR183	G protein-coupled receptor 183 [Source:NCBI gene;Acc:769212]	1
ENSGALG00000054572	-0.0519005	-0.741345	-2.15145	0.0569018	0.515057			12
ENSGALG00000001028	-0.466751	-0.653915	-2.15091	0.0569534	0.515178		ring finger protein 43 [Source:NCBI gene;Acc:100857874]	19
ENSGALG00000033068	3.69896	0.412645	2.15001	0.0570399	0.515614	TLR21	Toll-like receptor 21 [Source:NCBI gene;Acc:415623]	11
ENSGALG00000000669	4.82445	-0.282686	-2.14821	0.0572134	0.516837	ETV3	ETS variant 3 [Source:NCBI gene;Acc:426718]	25
ENSGALG00000009654	5.2019	0.395552	2.14711	0.0573201	0.517454		myeloid leukemia factor 1 [Source:NCBI gene;Acc:425019]	9
ENSGALG00000000731	2.06057	0.735994	2.1461	0.0574179	0.517824	THEMIS2	thymocyte selection associated family member 2 [Source:NCBI gene;Acc:419565]	23
ENSGALG00000006138	4.67571	0.829725	2.14431	0.0575914	0.517824	HELZ2	helicase with zinc finger 2 [Source:NCBI gene;Acc:419265]	20
ENSGALG00000014166	5.28312	0.266211	2.14504	0.0575205	0.517824	TSPO	translocator protein [Source:NCBI gene;Acc:418226]	1
ENSGALG00000041054	2.23963	0.739403	2.14503	0.0575214	0.517824			4
ENSGALG00000049798	5.6966	0.228135	2.1456	0.0574662	0.517824	HDGFL3	hepatoma-derived growth factor	related protein 3 [Source:NCBI gene;Acc:415463]	10
ENSGALG00000050240	3.19518	0.737125	2.14445	0.0575779	0.517824	TBX21	T-box 21 [Source:NCBI gene;Acc:100858002]	27
ENSGALG00000014811	6.28054	0.491976	2.14346	0.0576738	0.518219	SMCHD1	structural maintenance of chromosomes flexible hinge domain containing 1 [Source:NCBI gene;Acc:421057]	2
ENSGALG00000006236	2.02471	0.583274	2.14245	0.057772	0.518756	TPH1	tryptophan hydroxylase 1 [Source:NCBI gene;Acc:395799]	5
ENSGALG00000012364	5.51661	0.281558	2.14143	0.0578719	0.519307	PPIL4	peptidylprolyl isomerase like 4 [Source:NCBI gene;Acc:421625]	3
ENSGALG00000000461	9.56123	-0.30833	-2.13288	0.0587121	0.519336	MRC2	mannose receptor C type 2 [Source:NCBI gene;Acc:419950]	27
ENSGALG00000003135	5.44338	-0.303517	-2.13061	0.0589365	0.519336	ANK3	ankyrin 3 [Source:NCBI gene;Acc:396309]	6
ENSGALG00000003882	7.43234	0.20318	2.12581	0.0594151	0.519336	SMARCE1	SWI/SNF related	matrix associated	actin dependent regulator of chromatin	subfamily e	member 1 [Source:NCBI gene;Acc:420047]	27
ENSGALG00000004533	5.11023	-0.380025	-2.135	0.058503	0.519336	KIAA2013	KIAA2013 [Source:NCBI gene;Acc:428195]	21
ENSGALG00000005571	5.67127	0.243373	2.12821	0.0591758	0.519336	HCCS	holocytochrome c synthase [Source:NCBI gene;Acc:424482]	8
ENSGALG00000005700	5.85356	0.286543	2.12664	0.0593323	0.519336	GID8	GID complex subunit 8 homolog [Source:NCBI gene;Acc:419235]	20
ENSGALG00000006663	6.67615	-0.402787	-2.1251	0.0594869	0.519336	ARHGEF12	Rho guanine nucleotide exchange factor 12 [Source:NCBI gene;Acc:419752]	24
ENSGALG00000007324	2.0332	-0.62915	-2.13067	0.0589309	0.519336	TP63	tumor protein p63 [Source:NCBI gene;Acc:374269]	9
ENSGALG00000007364	5.7436	-0.463852	-2.12504	0.0594924	0.519336	TOB1	transducer of ERBB2	1 [Source:HGNC Symbol;Acc:HGNC:11979]	18
ENSGALG00000008756	7.05455	0.39267	2.13451	0.0585507	0.519336	PLEK	pleckstrin [Source:NCBI gene;Acc:395669]	3
ENSGALG00000009172	1.39019	-0.698215	-2.13675	0.0583301	0.519336	OSBPL6	oxysterol binding protein like 6 [Source:NCBI gene;Acc:424130]	7
ENSGALG00000009415	5.93809	-0.76306	-2.12714	0.0592829	0.519336	SMOC1	SPARC related modular calcium binding 1 [Source:NCBI gene;Acc:768688]	5
ENSGALG00000009500	6.06692	0.257639	2.1341	0.0585916	0.519336	VPS50	VPS50	EARP/GARPII complex subunit [Source:NCBI gene;Acc:420560]	2
ENSGALG00000010620	5.38703	0.30442	2.12595	0.0594012	0.519336	SPAST	spastin [Source:NCBI gene;Acc:421481]	3
ENSGALG00000010769	-0.0598121	-0.956614	-2.13804	0.0582032	0.519336	HPGD	hydroxyprostaglandin dehydrogenase 15-(NAD) [Source:NCBI gene;Acc:422567]	4
ENSGALG00000011811	5.46511	-0.351941	-2.13197	0.0588019	0.519336	SYNE2	spectrin repeat containing nuclear envelope protein 2 [Source:NCBI gene;Acc:423509]	5
ENSGALG00000012425	6.88624	-0.33436	-2.13547	0.058456	0.519336	FERMT2	fermitin family member 2 [Source:NCBI gene;Acc:423589]	5
ENSGALG00000012735	-0.052571	-0.777571	-2.12906	0.0590911	0.519336	EDN1	endothelin 1 [Source:NCBI gene;Acc:420854]	2
ENSGALG00000017205	3.38004	-0.404134	-2.13131	0.0588674	0.519336	ENDOD1	endonuclease domain containing 1 [Source:NCBI gene;Acc:428090]	1
ENSGALG00000017910	-1.09638	1.18035	2.13566	0.0584379	0.519336	U6	U6 spliceosomal RNA [Source:RFAM;Acc:RF00026]	18
ENSGALG00000020538	3.70056	-0.316142	-2.12732	0.0592649	0.519336	SLC49A3	major facilitator superfamily domain containing 7 [Source:NCBI gene;Acc:769710]	Z
ENSGALG00000030457	4.74204	0.372106	2.13617	0.0583875	0.519336	CHCHD5	coiled-coil-helix-coiled-coil-helix domain containing 5 [Source:NCBI gene;Acc:770886]	30
ENSGALG00000031449	-0.159644	-0.895262	-2.13857	0.0581516	0.519336	KCNV1	potassium voltage-gated channel modifier subfamily V member 1 [Source:NCBI gene;Acc:420278]	2
ENSGALG00000031593	7.18868	0.326258	2.12704	0.0592926	0.519336	TMSB15B	thymosin beta 15B [Source:NCBI gene;Acc:100502566]	4
ENSGALG00000031681	7.6249	0.326189	2.12997	0.0590009	0.519336	M6PR	mannose-6-phosphate receptor	cation dependent [Source:NCBI gene;Acc:396044]	1
ENSGALG00000032619	2.329	0.470614	2.12531	0.0594657	0.519336	SYPL2	synaptophysin like 2 [Source:NCBI gene;Acc:100858920]	26
ENSGALG00000033039	7.38286	-0.315414	-2.14005	0.0580066	0.519336	ENG	endoglin [Source:NCBI gene;Acc:771557]	17
ENSGALG00000036346	0.616133	0.555897	2.13496	0.0585063	0.519336	AMH	anti-Mullerian hormone [Source:NCBI gene;Acc:395887]	28
ENSGALG00000037067	8.60518	0.37726	2.13302	0.0586976	0.519336	EIF3E	eukaryotic translation initiation factor 3 subunit E [Source:NCBI gene;Acc:420272]	2
ENSGALG00000037773	5.88596	-0.403888	-2.13114	0.0588844	0.519336	ST3GAL1	ST3 beta-galactoside alpha-2	3-sialyltransferase 1 [Source:NCBI gene;Acc:396140]	2
ENSGALG00000038636	7.16178	0.420236	2.13143	0.0588554	0.519336	LAPTM5	lysosomal protein transmembrane 5 [Source:NCBI gene;Acc:419552]	23
ENSGALG00000039264	3.93103	0.548287	2.13217	0.0587825	0.519336	SLA	Src like adaptor [Source:NCBI gene;Acc:378908]	2
ENSGALG00000040586	7.0718	0.277422	2.1278	0.0592162	0.519336	TUBA3E	tubulin	alpha 3e [Source:NCBI gene;Acc:421169]	26
ENSGALG00000041475	2.84255	0.588367	2.13748	0.0582582	0.519336			11
ENSGALG00000042063	5.19233	0.385344	2.14081	0.0579323	0.519336	EPDR1	ependymin related 1 [Source:NCBI gene;Acc:420731]	2
ENSGALG00000048534	3.69762	-0.373371	-2.13982	0.0580288	0.519336			11
ENSGALG00000049461	5.80623	1.44293	2.13796	0.0582108	0.519336	BG8	MHC B-G antigen [Source:NCBI gene;Acc:417035]	16
ENSGALG00000052261	3.36272	0.302315	2.12748	0.0592481	0.519336			1
ENSGALG00000052653	1.64347	0.614289	2.12889	0.0591085	0.519336	PCDHAC1	protocadherin alpha subfamily C	1 [Source:NCBI gene;Acc:497223]	13
ENSGALG00000052796	5.98355	0.392335	2.12913	0.0590846	0.519336		chromosome Z open reading frame	human C18orf32 [Source:NCBI gene;Acc:426844]	Z
ENSGALG00000053281	3.123	0.495071	2.13203	0.0587965	0.519336	PKIA	protein kinase (cAMP-dependent	catalytic) inhibitor alpha [Source:NCBI gene;Acc:396333]	2
ENSGALG00000054964	3.02844	-0.589639	-2.12845	0.0591516	0.519336		putative Ensembl gene ENSGALG00000007530 [Source:NCBI gene;Acc:428714]	4
ENSGALG00000000474	8.43963	0.431893	2.1239	0.0596067	0.519346	RPL36	ribosomal protein L36 [Source:NCBI gene;Acc:373936]	28
ENSGALG00000007732	0.308919	-0.913114	-2.12388	0.0596091	0.519346	RTN4R	reticulon 4 receptor [Source:NCBI gene;Acc:417001]	15
ENSGALG00000048948	3.18618	0.320303	2.12393	0.0596041	0.519346			1
ENSGALG00000006409	6.18822	-0.338626	-2.1216	0.0598381	0.519764	PODXL	podocalyxin like [Source:NCBI gene;Acc:395755]	1
ENSGALG00000008552	0.289327	0.792144	2.12113	0.0598858	0.519764	MAL	mal	T cell differentiation protein [Source:NCBI gene;Acc:416707]	3
ENSGALG00000008646	-0.781558	-1.02826	-2.12111	0.0598882	0.519764		histidine rich glycoprotein [Source:NCBI gene;Acc:770588]	9
ENSGALG00000012877	5.8838	-0.419804	-2.12178	0.0598206	0.519764	CREB3L2	cAMP responsive element binding protein 3 like 2 [Source:NCBI gene;Acc:418123]	1
ENSGALG00000017142	5.5581	-0.247697	-2.12128	0.0598701	0.519764	PSPC1	paraspeckle component 1 [Source:NCBI gene;Acc:418955]	1
ENSGALG00000046817	9.79915	-0.856559	-2.1219	0.0598082	0.519764			8
ENSGALG00000014794	5.14558	0.224534	2.12057	0.0599422	0.519898	GDAP2	ganglioside induced differentiation associated protein 2 [Source:NCBI gene;Acc:425913]	1
ENSGALG00000010633	6.73925	0.332489	2.11922	0.0600781	0.520407	GPX7	glutathione peroxidase 7 [Source:NCBI gene;Acc:424643]	8
ENSGALG00000023571	6.29747	0.240145	2.11928	0.0600721	0.520407	TRIM59	tripartite motif containing 59 [Source:NCBI gene;Acc:425013]	9
ENSGALG00000055021	0.220952	-1.29032	-2.11865	0.0601364	0.520578	GREM2	gremlin 2	DAN family BMP antagonist [Source:NCBI gene;Acc:421507]	3
ENSGALG00000032915	5.34936	-0.528771	-2.11626	0.0603785	0.522003		chondroitin polymerizing factor [Source:NCBI gene;Acc:769112]	7
ENSGALG00000052610	3.02656	0.543864	2.11654	0.0603503	0.522003			12
ENSGALG00000009801	3.74256	0.389261	2.11566	0.0604399	0.522199	C5H15orf41	chromosome 5 C15orf41 homolog [Source:NCBI gene;Acc:423293]	5
ENSGALG00000002739	6.08227	0.201025	2.114	0.0606093	0.523179	INPP5K	inositol polyphosphate-5-phosphatase K [Source:NCBI gene;Acc:771549]	19
ENSGALG00000032684	2.95086	0.564062	2.11378	0.0606309	0.523179			14
ENSGALG00000000895	7.51927	0.228275	2.10939	0.0610814	0.524411	NUDC	nuclear distribution C	dynein complex regulator [Source:NCBI gene;Acc:419578]	23
ENSGALG00000002514	7.42887	-0.213127	-2.11059	0.0609579	0.524411	SFPQ	splicing factor proline and glutamine rich [Source:NCBI gene;Acc:395803]	23
ENSGALG00000003398	5.81435	-0.275462	-2.10799	0.0612253	0.524411	ADAM9	ADAM metallopeptidase domain 9 [Source:NCBI gene;Acc:426781]	22
ENSGALG00000007220	11.0517	0.351106	2.10981	0.0610373	0.524411	FTH1	ferritin heavy chain 1 [Source:NCBI gene;Acc:395970]	5
ENSGALG00000010822	1.75812	-0.421005	-2.10709	0.0613176	0.524411	SPATA4	spermatogenesis associated 4 [Source:NCBI gene;Acc:422571]	4
ENSGALG00000011861	1.59524	-0.533624	-2.11151	0.0608633	0.524411	SYT16	synaptotagmin 16 [Source:NCBI gene;Acc:423516]	5
ENSGALG00000013878	5.35902	-0.396639	-2.10739	0.061287	0.524411	PCYOX1	prenylcysteine oxidase 1 [Source:NCBI gene;Acc:426297]	22
ENSGALG00000014962	0.979596	1.64123	2.10709	0.0613181	0.524411	CALHM6	family with sequence similarity 26 member F [Source:NCBI gene;Acc:421744]	3
ENSGALG00000017015	6.01075	0.265779	2.10931	0.0610886	0.524411	RNASEH2B	ribonuclease H2 subunit B [Source:NCBI gene;Acc:418874]	1
ENSGALG00000035048	0.719719	-0.527746	-2.11028	0.0609891	0.524411			12
ENSGALG00000040926	4.81995	0.475008	2.11111	0.060904	0.524411	SAMSN1	SAM domain	SH3 domain and nuclear localization signals 1 [Source:NCBI gene;Acc:418470]	1
ENSGALG00000042647	0.170628	0.548574	2.10786	0.0612383	0.524411			11
ENSGALG00000043359	4.99842	0.240338	2.10784	0.0612403	0.524411	RRP9	ribosomal RNA processing 9	small subunit (SSU) processome component	homolog (yeast) [Source:NCBI gene;Acc:415888]	12
ENSGALG00000051398	6.355	0.265719	2.10773	0.061252	0.524411		transmembrane protein 14C-like [Source:NCBI gene;Acc:420860]	2
ENSGALG00000032598	2.22234	-0.868525	-2.10671	0.0613573	0.524414	MYO1A	myosin IA [Source:NCBI gene;Acc:396072]	33
ENSGALG00000002599	3.94692	0.432104	2.10471	0.0615637	0.524516	ARHGEF39	rho guanine nucleotide exchange factor 39 [Source:NCBI gene;Acc:431661]	Z
ENSGALG00000011096	5.29229	0.589387	2.10505	0.061528	0.524516	ABCB10	ATP binding cassette subfamily B member 10 [Source:NCBI gene;Acc:421537]	3
ENSGALG00000017003	1.30144	0.506558	2.10475	0.0615599	0.524516	MLNR	motilin receptor [Source:NCBI gene;Acc:428072]	1
ENSGALG00000035994	6.02008	0.321141	2.1059	0.0614407	0.524516		probable acyl coa dehydrogenase 6-like [Source:NCBI gene;Acc:420562]	2
ENSGALG00000042103	3.76638	-0.585747	-2.10492	0.0615416	0.524516	C5H11ORF96	chromosome 5 open reading frame	human C11orf96 [Source:NCBI gene;Acc:770209]	5
ENSGALG00000012546	5.74678	0.223032	2.10363	0.0616753	0.524804	MCM5	minichromosome maintenance complex component 5 [Source:NCBI gene;Acc:418058]	1
ENSGALG00000048563	3.07756	-0.470296	-2.10385	0.0616532	0.524804			Z
ENSGALG00000000209	6.49209	-0.268972	-2.10254	0.0617889	0.524955	PRNP	prion protein [Source:NCBI gene;Acc:396452]	22
ENSGALG00000008669	1.40826	0.725879	2.10085	0.061965	0.524955	CD28	CD28 molecule [Source:NCBI gene;Acc:396249]	7
ENSGALG00000010219	5.1851	0.600474	2.10253	0.0617896	0.524955	UROD	uroporphyrinogen decarboxylase [Source:NCBI gene;Acc:424590]	8
ENSGALG00000016852	2.16355	0.760887	2.10099	0.0619496	0.524955	TNFSF13B	tumor necrosis factor superfamily member 13b [Source:NCBI gene;Acc:374229]	1
ENSGALG00000020737	-0.689041	-0.821913	-2.10228	0.0618155	0.524955	KLHL23	kelch like family member 23 [Source:NCBI gene;Acc:429025]	7
ENSGALG00000032679	5.10726	0.347604	2.10168	0.0618787	0.524955	GCSH	glycine cleavage system protein H [Source:NCBI gene;Acc:415803]	11
ENSGALG00000040001	2.18843	-0.738444	-2.10084	0.0619655	0.524955			1
ENSGALG00000001373	4.0487	0.438264	2.09713	0.062353	0.52565	TRAF3IP3	TRAF3 interacting protein 3 [Source:NCBI gene;Acc:419862]	26
ENSGALG00000007128	8.61669	0.276695	2.0967	0.0623983	0.52565	SH3BGRL	SH3 domain binding glutamate rich protein like [Source:NCBI gene;Acc:422277]	4
ENSGALG00000009651	1.91136	-0.683216	-2.09692	0.0623756	0.52565	LXN	latexin [Source:NCBI gene;Acc:771519]	9
ENSGALG00000012986	5.66987	-0.298855	-2.09808	0.062254	0.52565	KDM5A	lysine (K)-specific demethylase 5A [Source:NCBI gene;Acc:418148]	1
ENSGALG00000014786	3.90429	0.55781	2.0976	0.0623043	0.52565	PIK3R1	phosphoinositide-3-kinase regulatory subunit 1 [Source:NCBI gene;Acc:427171]	Z
ENSGALG00000049811	5.24384	-0.25579	-2.09691	0.0623765	0.52565			28
ENSGALG00000050819	2.29698	-0.468633	-2.09827	0.0622335	0.52565			32
ENSGALG00000053738	-0.430405	0.819637	2.09735	0.0623302	0.52565			2
ENSGALG00000054447	1.0027	-0.622099	-2.09689	0.0623781	0.52565			15
ENSGALG00000004859	6.04776	0.986824	2.09609	0.0624627	0.525663	ZNFX1	zinc finger NFX1-type containing 1 [Source:NCBI gene;Acc:419218]	20
ENSGALG00000006795	-0.212766	0.673305	2.09594	0.0624778	0.525663	ABCG4	ATP binding cassette subfamily G member 4 [Source:NCBI gene;Acc:428242]	24
ENSGALG00000010177	6.80275	-0.252608	-2.09433	0.0626474	0.526761	ZFC3H1	zinc finger C3H1-type containing [Source:NCBI gene;Acc:417855]	1
ENSGALG00000001605	2.93347	0.399027	2.09037	0.0630652	0.526899	PPM1J	protein phosphatase	Mg2+/Mn2+ dependent 1J [Source:NCBI gene;Acc:419873]	26
ENSGALG00000002107	7.50335	0.244084	2.085	0.0636366	0.526899	RANBP1	RAN binding protein 1 [Source:NCBI gene;Acc:416787]	15
ENSGALG00000002639	5.35228	-0.266019	-2.08811	0.0633051	0.526899	TRPC1	transient receptor potential cation channel subfamily C member 1 [Source:NCBI gene;Acc:424776]	9
ENSGALG00000003304	3.80493	-0.412772	-2.08592	0.0635393	0.526899	CRTC1	CREB regulated transcription coactivator 1 [Source:NCBI gene;Acc:771015]	28
ENSGALG00000005248	3.99185	0.35186	2.08569	0.0635635	0.526899	CDC14A	cell division cycle 14A [Source:NCBI gene;Acc:424466]	8
ENSGALG00000009477	7.2006	0.440303	2.08585	0.0635463	0.526899	PDCD10	programmed cell death 10 [Source:NCBI gene;Acc:425003]	9
ENSGALG00000010625	1.18718	0.817417	2.08497	0.0636405	0.526899	SRD5A2	steroid 5 alpha-reductase 2 [Source:NCBI gene;Acc:772291]	3
ENSGALG00000011131	5.50029	0.324984	2.08503	0.0636343	0.526899	TANK	TRAF family member associated NFKB activator [Source:NCBI gene;Acc:424190]	7
ENSGALG00000014127	2.1448	0.63786	2.08509	0.0636277	0.526899			4
ENSGALG00000021079	3.9155	0.351846	2.0914	0.062957	0.526899	RGS19	regulator of G-protein signaling 19 [Source:NCBI gene;Acc:374070]	20
ENSGALG00000028191	4.52442	-0.269022	-2.09196	0.0628975	0.526899	GLCE	glucuronic acid epimerase [Source:NCBI gene;Acc:415566]	10
ENSGALG00000031542	5.82751	-0.258813	-2.08995	0.0631098	0.526899	EXT2	exostosin glycosyltransferase 2 [Source:NCBI gene;Acc:425859]	5
ENSGALG00000034029	6.98543	0.274017	2.08504	0.0636324	0.526899	FBXO3	F-box protein 3 [Source:NCBI gene;Acc:429495]	5
ENSGALG00000034179	7.17108	-0.298268	-2.0923	0.0628613	0.526899	SLC12A4	solute carrier family 12 member 4 [Source:NCBI gene;Acc:415715]	11
ENSGALG00000035978	6.28733	0.225723	2.08919	0.0631913	0.526899	CDCA7L	cell division cycle associated 7 like [Source:NCBI gene;Acc:420608]	2
ENSGALG00000036441	6.33553	-0.301988	-2.0869	0.0634341	0.526899	WIPF1	WAS/WASL interacting protein family member 1 [Source:NCBI gene;Acc:424143]	7
ENSGALG00000036949	4.4323	-0.318582	-2.08767	0.0633529	0.526899	ASAP3	ArfGAP with SH3 domain	ankyrin repeat and PH domain 3 [Source:NCBI gene;Acc:429809]	23
ENSGALG00000037166	2.2433	-0.498074	-2.08552	0.0635818	0.526899		uncharacterized LOC101752158 [Source:NCBI gene;Acc:101752158]	5
ENSGALG00000037370	6.04304	-0.432128	-2.09087	0.063013	0.526899	NAV1	neuron navigator 1 [Source:NCBI gene;Acc:430162]	26
ENSGALG00000038146	3.86828	0.417212	2.09229	0.0628626	0.526899		tripartite motif containing 58 [Source:NCBI gene;Acc:770718]	19
ENSGALG00000040342	3.70266	-0.578101	-2.0914	0.0629569	0.526899	ADAMTS1	ADAM metallopeptidase with thrombospondin type 1 motif 1 [Source:NCBI gene;Acc:418479]	1
ENSGALG00000040672	6.54351	-0.287577	-2.08534	0.0636008	0.526899	IGFBP4	insulin like growth factor binding protein 4 [Source:NCBI gene;Acc:374271]	27
ENSGALG00000042611	4.90195	-0.262591	-2.09179	0.0629155	0.526899		C-type lectin domain family 2 member B-like [Source:NCBI gene;Acc:107049847]	1
ENSGALG00000052088	2.98851	0.394463	2.08659	0.0634673	0.526899	SFR1	SWI5 dependent homologous recombination repair protein 1 [Source:NCBI gene;Acc:770846]	6
ENSGALG00000054780	-0.730124	-0.996048	-2.0854	0.0635946	0.526899			1
ENSGALG00000047303	3.13336	-0.314464	-2.08418	0.0637244	0.52727			13
ENSGALG00000012689	4.49062	-0.378541	-2.08377	0.0637685	0.527312	KIF13A	kinesin family member 13A [Source:NCBI gene;Acc:420832]	2
ENSGALG00000002904	6.27637	0.230692	2.07852	0.0643332	0.527614	REEP3	receptor accessory protein 3 [Source:NCBI gene;Acc:423654]	6
ENSGALG00000003319	2.67277	0.525744	2.07665	0.0645354	0.527614	ADAP2	ArfGAP with dual PH domains 2 [Source:NCBI gene;Acc:417409]	18
ENSGALG00000003458	6.02219	0.311683	2.07645	0.0645566	0.527614	CCZ1	CCZ1 vacuolar protein trafficking and biogenesis associated homolog (S. cerevisiae) [Source:NCBI gene;Acc:416433]	14
ENSGALG00000006584	2.92332	-0.680566	-2.07581	0.0646266	0.527614			24
ENSGALG00000008237	4.71574	-0.289599	-2.07995	0.0641792	0.527614	GRAMD2B	GRAM domain containing 3 [Source:NCBI gene;Acc:426813]	Z
ENSGALG00000008298	5.46387	0.488221	2.07622	0.0645819	0.527614	LRRC17	leucine rich repeat containing 17 [Source:NCBI gene;Acc:395440]	1
ENSGALG00000011035	5.37852	-0.569312	-2.0782	0.0643673	0.527614		adenylate kinase 4 [Source:NCBI gene;Acc:424697]	8
ENSGALG00000011379	2.58307	-0.420474	-2.07677	0.0645222	0.527614	SLC44A5	solute carrier family 44 member 5 [Source:NCBI gene;Acc:429117]	8
ENSGALG00000011671	2.99401	0.373733	2.08135	0.0640279	0.527614	SLC15A2	solute carrier family 15 member 2 [Source:NCBI gene;Acc:424244]	7
ENSGALG00000012683	1.33321	-0.565727	-2.079	0.0642816	0.527614	RNF144B	ring finger protein 144B [Source:NCBI gene;Acc:420827]	2
ENSGALG00000015949	3.55473	0.278188	2.07684	0.0645143	0.527614	ASRGL1	asparaginase like 1 [Source:NCBI gene;Acc:421868]	3
ENSGALG00000023936	3.70534	0.400398	2.07963	0.0642135	0.527614		C-factor-like [Source:NCBI gene;Acc:771069]	21
ENSGALG00000024391	6.05091	0.211287	2.07856	0.0643289	0.527614	CACTIN	cactin	spliceosome C complex subunit [Source:NCBI gene;Acc:420073]	28
ENSGALG00000029834	5.54806	0.58876	2.0796	0.0642164	0.527614	AIF1L	allograft inflammatory factor 1-like [Source:NCBI gene;Acc:417179]	17
ENSGALG00000036490	6.03931	0.268344	2.07884	0.0642987	0.527614	CYRIB	family with sequence similarity 49 member B [Source:NCBI gene;Acc:420330]	2
ENSGALG00000036805	6.8535	0.81144	2.07647	0.0645551	0.527614		spectrin beta	erythrocytic [Source:NCBI gene;Acc:769410]	5
ENSGALG00000039163	6.12898	-0.29979	-2.08185	0.063975	0.527614	ARHGEF11	Rho guanine nucleotide exchange factor 11 [Source:NCBI gene;Acc:425979]	25
ENSGALG00000039535	4.60892	0.272043	2.07898	0.0642838	0.527614	D2HGDH	D-2-hydroxyglutarate dehydrogenase [Source:NCBI gene;Acc:424853]	9
ENSGALG00000040854	5.72834	0.39552	2.08021	0.0641505	0.527614	CPPED1	calcineurin like phosphoesterase domain containing 1 [Source:NCBI gene;Acc:416418]	14
ENSGALG00000046559	5.16799	0.462816	2.07611	0.0645943	0.527614		programmed cell death 1 [Source:NCBI gene;Acc:424913]	9
ENSGALG00000051984	1.58889	-0.86072	-2.08116	0.0640485	0.527614		cadherin 3 [Source:NCBI gene;Acc:414845]	11
ENSGALG00000011803	5.34875	-0.47943	-2.07467	0.0647505	0.527667	EMP1	epithelial membrane protein 1 [Source:NCBI gene;Acc:417964]	1
ENSGALG00000013212	-0.146811	0.937627	2.07492	0.0647234	0.527667		transmembrane protein with EGF-like and two follistatin-like domains 1 [Source:NCBI gene;Acc:420985]	2
ENSGALG00000032413	6.97448	0.363826	2.07504	0.0647098	0.527667	NADK	NAD kinase [Source:NCBI gene;Acc:419403]	21
ENSGALG00000012658	6.53929	0.390145	2.07426	0.0647943	0.527706	TCP11X2	t-complex 11 family	X-linked 2 [Source:NCBI gene;Acc:425052]	1
ENSGALG00000001777	7.56034	0.354038	2.07113	0.0651362	0.52826	MFSD11	major facilitator superfamily domain containing 11 [Source:NCBI gene;Acc:417352]	18
ENSGALG00000011242	0.534417	0.570842	2.07146	0.0650994	0.52826	OBSL1	obscurin like 1 [Source:NCBI gene;Acc:424198]	7
ENSGALG00000011450	2.12969	0.889114	2.07051	0.0652038	0.52826		leukotriene C4 synthase-like [Source:NCBI gene;Acc:770665]	13
ENSGALG00000014342	4.62026	-0.235513	-2.07306	0.0649252	0.52826	TEAD4	TEA domain transcription factor 4 [Source:NCBI gene;Acc:395542]	1
ENSGALG00000015122	1.93633	1.13687	2.07056	0.0651981	0.52826	TAF4B	TATA-box binding protein associated factor 4b [Source:NCBI gene;Acc:421086]	2
ENSGALG00000034150	5.03577	0.873973	2.07093	0.0651578	0.52826	CATHL3	cathelicidin-3 [Source:NCBI gene;Acc:100858343]	2
ENSGALG00000038393	3.89535	0.602846	2.07252	0.0649841	0.52826	DMB2	major histocompatibility complex	class II	DM beta 2 [Source:NCBI gene;Acc:417051]	16
ENSGALG00000047702	3.75212	-0.278773	-2.07041	0.0652149	0.52826			14
ENSGALG00000053934	-0.313273	-0.625969	-2.07141	0.0651051	0.52826			6
ENSGALG00000007276	6.80234	-0.272452	-2.06982	0.0652792	0.528464	GCN1	GCN1	eIF2 alpha kinase activator homolog [Source:NCBI gene;Acc:416982]	15
ENSGALG00000009916	5.89399	-0.282436	-2.06922	0.0653445	0.528675	SCFD1	sec1 family domain containing 1 [Source:NCBI gene;Acc:423307]	5
ENSGALG00000007952	4.7635	-0.237499	-2.06768	0.0655141	0.52973	AMOT	angiomotin [Source:NCBI gene;Acc:422336]	4
ENSGALG00000034383	3.39901	0.269424	2.06671	0.0656203	0.529953	TRMT2B	tRNA (uracil-5-)-methyltransferase homolog [Source:NCBI gene;Acc:100858909]	4
ENSGALG00000035493	4.59723	0.298784	2.06702	0.0655864	0.529953	POC1B	POC1 centriolar protein B [Source:NCBI gene;Acc:417889]	1
ENSGALG00000008034	3.28217	-0.383276	-2.0653	0.0657755	0.529956	CASKIN2	CASK interacting protein 2 [Source:NCBI gene;Acc:422125]	18
ENSGALG00000025780	4.57962	-0.357611	-2.06457	0.0658565	0.529956	ITPRIP	inositol 1	4	5-trisphosphate receptor interacting protein [Source:NCBI gene;Acc:428979]	6
ENSGALG00000031408	3.19769	0.442993	2.06601	0.0656979	0.529956	SORD	sorbitol dehydrogenase [Source:NCBI gene;Acc:415332]	10
ENSGALG00000035537	4.87825	0.265234	2.06493	0.0658162	0.529956	SYNJ2BP	synaptojanin 2 binding protein [Source:NCBI gene;Acc:430724]	5
ENSGALG00000039001	3.83011	-0.376677	-2.06521	0.0657855	0.529956	FILIP1	filamin A interacting protein 1 [Source:NCBI gene;Acc:421860]	3
ENSGALG00000039571	2.0828	-0.754147	-2.06485	0.0658255	0.529956	PRPH	peripherin [Source:NCBI gene;Acc:101748212]	33
ENSGALG00000036582	0.616259	0.678352	2.0642	0.0658971	0.529966		zinc finger CCCH domain-containing protein 11A-like [Source:NCBI gene;Acc:107057021]	14
ENSGALG00000001109	3.52333	-0.862022	-2.06183	0.0661601	0.530629	GTSF1	gametocyte specific factor 1 [Source:NCBI gene;Acc:771059]	27
ENSGALG00000003507	4.21198	-0.270607	-2.06124	0.0662254	0.530629	TECPR1	tectonin beta-propeller repeat containing 1 [Source:NCBI gene;Acc:416436]	14
ENSGALG00000007996	6.33679	0.296808	2.05978	0.0663877	0.530629	ANKRD44	ankyrin repeat domain 44 [Source:NCBI gene;Acc:424055]	7
ENSGALG00000011531	4.98932	0.329489	2.05969	0.066397	0.530629	APAF1	apoptotic peptidase activating factor 1 [Source:NCBI gene;Acc:417926]	1
ENSGALG00000015293	5.97833	-0.441242	-2.05785	0.0666022	0.530629	TMEM45A	transmembrane protein 45A [Source:NCBI gene;Acc:418389]	1
ENSGALG00000016578	6.28841	0.282035	2.06076	0.0662786	0.530629	TRAPPC2	trafficking protein particle complex 2 [Source:NCBI gene;Acc:418634]	1
ENSGALG00000021627	5.4457	0.720155	2.06169	0.0661748	0.530629	IFI27L2	interferon	alpha-inducible protein 27-like 2 [Source:NCBI gene;Acc:403121]	23
ENSGALG00000022718	2.25955	-0.681501	-2.06171	0.0661727	0.530629	FUT4	fucosyltransferase 4 [Source:NCBI gene;Acc:428092]	1
ENSGALG00000029500	10.6867	0.476065	2.06146	0.0662009	0.530629	ND5	NADH-ubiquinone oxidoreductase chain 5 [Source:UniProtKB/Swiss-Prot;Acc:P18940]	MT
ENSGALG00000034919	6.02712	-0.439575	-2.05846	0.0665343	0.530629	CDK2AP1	cyclin dependent kinase 2 associated protein 1 [Source:NCBI gene;Acc:416826]	15
ENSGALG00000035733	3.10723	0.67052	2.058	0.0665859	0.530629	CCR7	C-C motif chemokine receptor 7 [Source:NCBI gene;Acc:428315]	27
ENSGALG00000036306	1.03314	-0.515546	-2.05806	0.0665783	0.530629			2
ENSGALG00000040247	4.68103	0.270656	2.05779	0.066609	0.530629	AIP	aryl hydrocarbon receptor interacting protein [Source:NCBI gene;Acc:395123]	5
ENSGALG00000041867	6.52937	0.208577	2.05811	0.0665737	0.530629	IFNAR2	interferon alpha and beta receptor subunit 2 [Source:NCBI gene;Acc:395664]	1
ENSGALG00000052383	-0.805583	0.717326	2.05779	0.0666088	0.530629			2
ENSGALG00000053274	4.32762	0.390477	2.05878	0.066498	0.530629	PPP1R14B	protein phosphatase 1 regulatory subunit 14C-like [Source:NCBI gene;Acc:107051531]	33
ENSGALG00000004852	4.5062	-0.436577	-2.05427	0.0670025	0.531132	DNM1	dynamin 1 [Source:NCBI gene;Acc:417217]	17
ENSGALG00000010900	5.3539	0.337305	2.05448	0.0669798	0.531132	SPC25	SPC25	NDC80 kinetochore complex component [Source:NCBI gene;Acc:424172]	7
ENSGALG00000015306	6.74984	0.334774	2.05406	0.0670265	0.531132	OSTM1	osteopetrosis associated transmembrane protein 1 [Source:NCBI gene;Acc:421773]	3
ENSGALG00000029679	0.517487	-0.782292	-2.05442	0.0669862	0.531132	PLEKHA7	pleckstrin homology domain containing A7 [Source:NCBI gene;Acc:423069]	5
ENSGALG00000035804	6.23943	-0.300206	-2.05408	0.0670245	0.531132	SQSTM1	sequestosome 1 [Source:NCBI gene;Acc:770805]	13
ENSGALG00000039658	5.80305	0.201421	2.05596	0.0668132	0.531132	GGA1	golgi associated	gamma adaptin ear containing	ARF binding protein 1 [Source:NCBI gene;Acc:100857525]	1
ENSGALG00000039724	3.34576	0.323316	2.05579	0.0668327	0.531132	RHOF	ras homolog family member F	filopodia associated [Source:NCBI gene;Acc:416848]	15
ENSGALG00000044466	3.17577	0.508514	2.05678	0.0667214	0.531132		receptor-interacting serine-threonine kinase 3 [Source:NCBI gene;Acc:415708]	11
ENSGALG00000053676	0.223599	-0.723001	-2.05644	0.0667594	0.531132			25
ENSGALG00000054683	-0.473709	0.698977	2.05358	0.0670798	0.531242			6
ENSGALG00000041353	5.48912	0.26004	2.05269	0.0671802	0.531725	TP53INP1	tumor protein p53 inducible nuclear protein 1 [Source:NCBI gene;Acc:420232]	2
ENSGALG00000007717	4.2914	0.401484	2.04782	0.06773	0.531883	GCNT7	glucosaminyl (N-acetyl) transferase family member 7 [Source:NCBI gene;Acc:769120]	20
ENSGALG00000008357	4.7426	-0.306542	-2.04635	0.0678976	0.531883	TPCN1	cation channel sperm associated 4 [Source:NCBI gene;Acc:417033]	15
ENSGALG00000008439	6.14267	0.846517	2.04903	0.0675939	0.531883	CD36	CD36 molecule [Source:NCBI gene;Acc:417730]	1
ENSGALG00000008862	6.14107	-0.240035	-2.04788	0.0677235	0.531883	DNAJC10	DnaJ heat shock protein family (Hsp40) member C10 [Source:NCBI gene;Acc:424115]	7
ENSGALG00000009622	4.9873	0.313389	2.05116	0.0673525	0.531883		uncharacterized LOC422426 [Source:NCBI gene;Acc:422426]	4
ENSGALG00000010190	6.53645	0.301778	2.04697	0.0678273	0.531883	TBC1D15	TBC1 domain family member 15 [Source:NCBI gene;Acc:417857]	1
ENSGALG00000013951	3.70988	-0.302727	-2.04976	0.0675106	0.531883	AHI1	Abelson helper integration site 1 [Source:NCBI gene;Acc:421693]	3
ENSGALG00000015860	1.97352	0.540298	2.04641	0.0678905	0.531883	UBE3D	ubiquitin protein ligase E3D [Source:NCBI gene;Acc:421843]	3
ENSGALG00000016024	2.1803	-0.526089	-2.04935	0.0675569	0.531883	SETD4	SET domain containing 4 [Source:NCBI gene;Acc:418511]	1
ENSGALG00000016444	6.90792	0.232083	2.04933	0.0675596	0.531883	ODC1	ornithine decarboxylase 1 [Source:NCBI gene;Acc:421937]	3
ENSGALG00000016929	3.28147	0.318876	2.04786	0.0677263	0.531883	PIBF1	progesterone immunomodulatory binding factor 1 [Source:NCBI gene;Acc:418820]	1
ENSGALG00000021365	5.81717	0.229392	2.05017	0.0674646	0.531883	DCTN3	dynactin subunit 3 [Source:NCBI gene;Acc:427404]	Z
ENSGALG00000029330	5.81698	0.434109	2.04624	0.06791	0.531883		mediator complex subunit 29 [Source:NCBI gene;Acc:107055391]	32
ENSGALG00000031741	6.45951	-0.205159	-2.04712	0.0678095	0.531883	PTK2	protein tyrosine kinase 2 [Source:NCBI gene;Acc:396416]	2
ENSGALG00000033530	6.53912	0.397649	2.05028	0.0674518	0.531883	GRN	granulin precursor [Source:HGNC Symbol;Acc:HGNC:4601]	27
ENSGALG00000033908	3.14802	1.03257	2.0512	0.0673484	0.531883	SLC10A4	solute carrier family 10 member 4 [Source:NCBI gene;Acc:770263]	4
ENSGALG00000034737	5.01413	-0.345257	-2.04766	0.0677491	0.531883		GLIS family zinc finger 2 [Source:NCBI gene;Acc:374023]	14
ENSGALG00000039302	4.94407	0.352643	2.05177	0.0672838	0.531883	MINA	MYC induced nuclear antigen [Source:NCBI gene;Acc:418436]	1
ENSGALG00000000003	0.760807	-0.458097	-2.04549	0.0679948	0.532238	PANX2	pannexin 2 [Source:NCBI gene;Acc:426934]	1
ENSGALG00000050065	2.17579	0.721588	2.0448	0.0680734	0.532544	CYSLTR2	cysteinyl leukotriene receptor 2 [Source:NCBI gene;Acc:428071]	1
ENSGALG00000028871	6.46537	-1.00579	-2.04409	0.0681541	0.532867	SLC38A3	solute carrier family 38 member 3 [Source:NCBI gene;Acc:429200]	12
ENSGALG00000036567	5.4917	0.214064	2.04328	0.0682475	0.532978	ARMC1	armadillo repeat containing 1 [Source:NCBI gene;Acc:429406]	2
ENSGALG00000043026	-0.616876	0.895245	2.04341	0.0682317	0.532978		peripheral-type benzodiazepine receptor-associated protein 1-like [Source:NCBI gene;Acc:107057437]	24
ENSGALG00000039193	5.27345	-0.411675	-2.04266	0.0683176	0.533218	AGRN	agrin [Source:NCBI gene;Acc:396538]	21
ENSGALG00000004121	6.87053	-0.610525	-2.03999	0.0686237	0.533394	LPAR4	lysophosphatidic acid receptor 4 [Source:NCBI gene;Acc:422149]	4
ENSGALG00000010809	7.65987	0.21074	2.0414	0.0684625	0.533394	BZW2	basic leucine zipper and W2 domains 2 [Source:NCBI gene;Acc:420594]	2
ENSGALG00000013727	3.68722	-0.314745	-2.04064	0.0685492	0.533394	SYNJ2	synaptojanin 2 [Source:NCBI gene;Acc:421656]	3
ENSGALG00000016400	4.41587	1.22546	2.03947	0.068684	0.533394	RSAD2	radical S-adenosyl methionine domain containing 2 [Source:NCBI gene;Acc:428650]	3
ENSGALG00000018700	3.29473	0.379514	2.0402	0.0685996	0.533394	PLPP7	phospholipid phosphatase 7 (inactive) [Source:NCBI gene;Acc:417178]	17
ENSGALG00000039288	7.91755	-0.238102	-2.03936	0.0686962	0.533394	RBM10	RNA binding motif protein 10 [Source:NCBI gene;Acc:415947]	12
ENSGALG00000043545	5.3932	0.278285	2.03977	0.0686494	0.533394	PNPT1	polyribonucleotide nucleotidyltransferase 1 [Source:NCBI gene;Acc:421206]	3
ENSGALG00000046159	1.83335	-0.877588	-2.04199	0.0683946	0.533394	KNG1	kininogen 1 [Source:NCBI gene;Acc:424957]	9
ENSGALG00000048592	2.89376	0.445545	2.04126	0.0684785	0.533394			32
ENSGALG00000010623	3.70988	0.297093	2.03789	0.0688653	0.533494	ORC1	origin recognition complex subunit 1 [Source:NCBI gene;Acc:424640]	8
ENSGALG00000022815	7.83174	0.686561	2.03852	0.0687927	0.533494	AvBD1	avian beta-defensin 1 [Source:NCBI gene;Acc:395841]	3
ENSGALG00000034584	5.17471	-0.23475	-2.03886	0.0687532	0.533494		neural precursor cell expressed	developmentally down-regulated 4-like	E3 ubiquitin protein ligase [Source:NCBI gene;Acc:374119]	Z
ENSGALG00000054554	-0.763429	-0.867123	-2.03787	0.0688673	0.533494			15
ENSGALG00000027905	3.9516	-0.341042	-2.03646	0.0690303	0.53445	CSRNP1	cysteine and serine rich nuclear protein 1 [Source:NCBI gene;Acc:420425]	2
ENSGALG00000008389	6.07413	0.214239	2.03571	0.0691163	0.534557	VBP1	LOC772071 [Source:NCBI gene;Acc:772071]	4
ENSGALG00000036796	2.93044	0.415413	2.03565	0.0691234	0.534557	HYLS1	HYLS1	centriolar and ciliogenesis associated [Source:NCBI gene;Acc:768796]	24
ENSGALG00000002463	4.71267	0.370225	2.03438	0.0692713	0.534677	SUMF2	sulfatase modifying factor 2 [Source:NCBI gene;Acc:417542]	19
ENSGALG00000003767	2.5762	-0.414923	-2.0346	0.0692455	0.534677	NKD1	naked cuticle homolog 1 [Source:NCBI gene;Acc:415729]	11
ENSGALG00000005519	-0.695149	0.963737	2.03475	0.0692275	0.534677	TLL2	tolloid-like 2 [Source:NCBI gene;Acc:107053676]	6
ENSGALG00000043421	5.26695	0.286901	2.03415	0.0692975	0.534677		zinc finger MYM-type containing 2 [Source:NCBI gene;Acc:418954]	1
ENSGALG00000002646	4.27938	-0.44473	-2.03254	0.0694839	0.534949	FAM171B	family with sequence similarity 171 member B [Source:NCBI gene;Acc:423991]	7
ENSGALG00000015156	3.64832	-0.269992	-2.03247	0.0694918	0.534949	NMRK1	nicotinamide riboside kinase 1 [Source:NCBI gene;Acc:427257]	Z
ENSGALG00000016698	2.75846	-0.559881	-2.03314	0.0694144	0.534949	SHOX	short stature homeobox [Source:NCBI gene;Acc:418669]	1
ENSGALG00000037241	3.83512	0.273657	2.03224	0.0695185	0.534949	KCNAB2	potassium voltage-gated channel subfamily A regulatory beta subunit 2 [Source:NCBI gene;Acc:396068]	21
ENSGALG00000052039	-0.3159	0.88554	2.03214	0.0695311	0.534949			12
ENSGALG00000002129	5.34124	-0.240709	-2.03131	0.0696267	0.53538	WDR47	WD repeat domain 47 [Source:NCBI gene;Acc:424344]	8
ENSGALG00000014447	4.39867	0.330213	2.02969	0.0698157	0.536527	AK3	adenylate kinase 3 [Source:NCBI gene;Acc:426534]	Z
ENSGALG00000009040	5.20816	-0.252743	-2.02814	0.0699966	0.536842	TBC1D8B	TBC1 domain family member 8B [Source:NCBI gene;Acc:422383]	4
ENSGALG00000010227	5.6077	0.471529	2.02766	0.0700534	0.536842	KRR1	KRR1	small subunit processome component homolog [Source:NCBI gene;Acc:417863]	1
ENSGALG00000012699	4.89529	0.352482	2.02809	0.0700032	0.536842	MCUR1	mitochondrial calcium uniporter regulator 1 [Source:NCBI gene;Acc:420837]	2
ENSGALG00000026834	4.98234	-0.269494	-2.02764	0.0700558	0.536842	PLPP2	phospholipid phosphatase 2 [Source:NCBI gene;Acc:100858471]	28
ENSGALG00000051206	2.58159	0.341908	2.02773	0.0700454	0.536842	RBMX2	RNA binding motif protein	X-linked 2 [Source:NCBI gene;Acc:769358]	4
ENSGALG00000014749	3.73787	-0.441307	-2.02705	0.0701241	0.537061	EPHB6	EPH receptor B6 [Source:NCBI gene;Acc:418308]	1
ENSGALG00000050760	5.07434	-0.384176	-2.02561	0.0702942	0.538058	ADCY6	adenylate cyclase type 6-like [Source:NCBI gene;Acc:107050028]	33
ENSGALG00000004259	7.61335	0.256104	2.02479	0.0703896	0.538482	BLMH	bleomycin hydrolase [Source:NCBI gene;Acc:395996]	19
ENSGALG00000034473	6.19598	0.283611	2.02429	0.0704493	0.538633	PARP4	poly(ADP-ribose) polymerase family member 4 [Source:NCBI gene;Acc:418958]	1
ENSGALG00000017035	5.4775	-0.231459	-2.02349	0.0705432	0.53903	COG6	component of oligomeric golgi complex 6 [Source:NCBI gene;Acc:418888]	1
ENSGALG00000027872	1.8987	0.367998	2.02317	0.070581	0.53903	STBD1	starch binding domain 1 [Source:NCBI gene;Acc:422637]	4
ENSGALG00000031158	7.74443	-0.231877	-2.02222	0.0706927	0.539577	OAT	ornithine aminotransferase [Source:NCBI gene;Acc:426430]	6
ENSGALG00000006782	4.88514	0.299083	2.02076	0.0708651	0.540377	MRPL46	mitochondrial ribosomal protein L46 [Source:NCBI gene;Acc:415499]	10
ENSGALG00000016932	5.29407	0.510208	2.02032	0.0709177	0.540377	MZT1	mitotic spindle organizing protein 1 [Source:NCBI gene;Acc:418822]	1
ENSGALG00000016991	6.18936	0.267194	2.0206	0.0708843	0.540377	ESD	esterase D [Source:NCBI gene;Acc:418856]	1
ENSGALG00000020939	4.79067	-0.264386	-2.01935	0.0710329	0.540885	SLC35C2	solute carrier family 35 member C2 [Source:NCBI gene;Acc:419306]	20
ENSGALG00000050564	3.18693	0.452117	2.01908	0.0710646	0.540885			6
ENSGALG00000005626	2.93404	0.495673	2.01818	0.0711717	0.54109	TPST2	tyrosylprotein sulfotransferase 2 [Source:NCBI gene;Acc:416910]	15
ENSGALG00000009272	3.86556	-0.386648	-2.01821	0.0711676	0.54109		uncharacterized LOC100857197 [Source:NCBI gene;Acc:100857197]	4
ENSGALG00000010402	4.56673	0.573208	2.0172	0.0712885	0.54128	HPGDS	hematopoietic prostaglandin D synthase [Source:NCBI gene;Acc:395863]	4
ENSGALG00000033690	5.88956	0.335589	2.01695	0.0713172	0.54128	RSL1D1	ribosomal L1 domain containing 1 [Source:NCBI gene;Acc:416416]	14
ENSGALG00000043606	3.65562	0.348743	2.0175	0.0712527	0.54128			33
ENSGALG00000014585	4.99341	0.386042	2.01658	0.0713619	0.541315		C-C motif chemokine ligand 26 [Source:NCBI gene;Acc:417534]	19
ENSGALG00000005214	1.89731	0.492552	2.01248	0.0718518	0.541382	TERB1	telomere repeat binding bouquet formation protein 1 [Source:NCBI gene;Acc:769532]	11
ENSGALG00000006118	5.11917	-0.267716	-2.01282	0.071811	0.541382	ZC3H18	zinc finger CCCH-type containing 18 [Source:NCBI gene;Acc:415838]	11
ENSGALG00000010476	6.06194	0.404024	2.01247	0.0718525	0.541382	BNIP3	BCL2 interacting protein 3 [Source:NCBI gene;Acc:423971]	6
ENSGALG00000011175	3.56595	0.44441	2.0132	0.0717658	0.541382	TMEM150C	transmembrane protein 150C [Source:NCBI gene;Acc:422599]	4
ENSGALG00000013867	6.26622	0.227429	2.01316	0.0717703	0.541382	PTPN2	protein tyrosine phosphatase	non-receptor type 2 [Source:NCBI gene;Acc:396409]	2
ENSGALG00000028204	8.40428	0.439734	2.01539	0.0715034	0.541382	GPX1	glutathione peroxidase 1 [Source:NCBI gene;Acc:100857115]	12
ENSGALG00000035599	5.1956	-0.409309	-2.0161	0.0714192	0.541382	CD24	CD24 molecule [Source:NCBI gene;Acc:100859742]	3
ENSGALG00000037812	1.88295	-0.434391	-2.01379	0.0716946	0.541382	USP43	ubiquitin specific peptidase 43 [Source:NCBI gene;Acc:101751148]	18
ENSGALG00000038634	4.41221	0.387197	2.01415	0.0716523	0.541382	KIT	KIT proto-oncogene receptor tyrosine kinase [Source:NCBI gene;Acc:378783]	4
ENSGALG00000048325	4.35063	0.401414	2.01456	0.0716034	0.541382	GBP	guanylate binding protein [Source:NCBI gene;Acc:395366]	12
ENSGALG00000051665	3.99822	0.414685	2.01466	0.071591	0.541382	LYRM4	LYR motif containing 4 [Source:NCBI gene;Acc:420874]	2
ENSGALG00000053645	1.07238	-0.571551	-2.01279	0.0718152	0.541382			5
ENSGALG00000024480	4.90977	0.279199	2.012	0.0719098	0.541512	TIMMDC1	translocase of inner mitochondrial membrane domain containing 1 [Source:NCBI gene;Acc:418453]	1
ENSGALG00000000681	3.59661	-0.384784	-2.00762	0.0724371	0.541655	PAK1	p21 (RAC1) activated kinase 1 [Source:NCBI gene;Acc:419083]	1
ENSGALG00000000866	4.22721	0.434252	2.00748	0.0724531	0.541655	SELENBP1	selenium binding protein 1 [Source:NCBI gene;Acc:425664]	25
ENSGALG00000009929	1.91107	1.7789	2.0104	0.0721022	0.541655	SOST	sclerostin [Source:NCBI gene;Acc:429784]	27
ENSGALG00000010680	4.32719	0.236153	2.00682	0.0725329	0.541655	TTC7B	tetratricopeptide repeat domain 7B [Source:NCBI gene;Acc:423407]	5
ENSGALG00000010961	5.22049	0.304112	2.00866	0.0723107	0.541655	IGF2BP3	insulin like growth factor 2 mRNA binding protein 3 [Source:NCBI gene;Acc:420617]	2
ENSGALG00000012480	6.24257	0.527035	2.00543	0.0727016	0.541655	NMI	N-myc and STAT interactor [Source:NCBI gene;Acc:424314]	7
ENSGALG00000013098	5.87854	0.332897	2.00644	0.0725798	0.541655	MGST1	microsomal glutathione S-transferase 1 [Source:NCBI gene;Acc:418178]	1
ENSGALG00000014428	3.6704	0.414509	2.00744	0.0724581	0.541655	TAPBPL	TAP binding protein like [Source:NCBI gene;Acc:426340]	1
ENSGALG00000015030	5.9011	-0.256889	-2.01041	0.0721008	0.541655	NPC1	NPC intracellular cholesterol transporter 1 [Source:NCBI gene;Acc:421076]	2
ENSGALG00000015892	1.63752	-0.635141	-2.00663	0.0725568	0.541655	IRAK1BP1	interleukin 1 receptor associated kinase 1 binding protein 1 [Source:NCBI gene;Acc:421857]	3
ENSGALG00000028451	4.8832	0.835215	2.00845	0.0723365	0.541655	MT4	metallothionein 4 [Source:NCBI gene;Acc:396212]	11
ENSGALG00000029354	3.80218	0.576151	2.00522	0.0727271	0.541655	GMIP	GEM interacting protein [Source:NCBI gene;Acc:426010]	30
ENSGALG00000034020	3.48555	-0.275907	-2.00547	0.0726976	0.541655	RHOBTB2	Rho-related BTB domain containing 2 [Source:NCBI gene;Acc:419536]	22
ENSGALG00000034081	2.91589	-0.378909	-2.00733	0.0724713	0.541655	AKT3	AKT serine/threonine kinase 3 [Source:NCBI gene;Acc:421497]	3
ENSGALG00000036086	7.36771	-0.300669	-2.00518	0.072732	0.541655	TAGLN2	immunoglobulin superfamily member 9 [Source:NCBI gene;Acc:425454]	25
ENSGALG00000036915	4.97518	-0.429224	-2.00625	0.0726022	0.541655	SQLE	squalene epoxidase [Source:NCBI gene;Acc:420335]	2
ENSGALG00000037733	4.97682	-0.262517	-2.01053	0.0720864	0.541655		death-associated protein kinase 3 [Source:NCBI gene;Acc:101748881]	28
ENSGALG00000038596	-1.11761	-1.33917	-2.0068	0.0725355	0.541655	C14orf132	chromosome 14 open reading frame 132 [Source:NCBI gene;Acc:101749230]	5
ENSGALG00000040942	1.91914	-0.440643	-2.0084	0.0723423	0.541655	EFCAB5	EF-hand calcium binding domain 5 [Source:NCBI gene;Acc:417587]	19
ENSGALG00000052643	4.20207	0.775695	2.00727	0.0724787	0.541655	C15orf48	chromosome 15 open reading frame 48 [Source:HGNC Symbol;Acc:HGNC:29898]	10
ENSGALG00000036240	3.31247	-0.513532	-2.00459	0.0728039	0.541891	AKAP12	A-kinase anchoring protein 12 [Source:NCBI gene;Acc:421634]	3
ENSGALG00000004087	3.51893	-0.674572	-2.00387	0.0728915	0.541945	THSD4	thrombospondin type 1 domain containing 4 [Source:NCBI gene;Acc:415395]	10
ENSGALG00000011687	2.91682	-0.863641	-2.00417	0.0728548	0.541945		AHNAK nucleoprotein 2 [Source:NCBI gene;Acc:100859120]	5
ENSGALG00000045125	1.93475	0.428358	2.00349	0.0729378	0.54199	GP5	glycoprotein V platelet [Source:NCBI gene;Acc:100857508]	9
ENSGALG00000008257	4.69293	0.247907	2.00251	0.0730569	0.542084	MERTK	MER proto-oncogene	tyrosine kinase [Source:NCBI gene;Acc:395836]	3
ENSGALG00000020528	5.74712	0.325795	2.00239	0.073071	0.542084	INIP	INTS3 and NABP interacting protein [Source:NCBI gene;Acc:427331]	Z
ENSGALG00000039480	2.51414	0.85347	2.00296	0.0730021	0.542084			16
ENSGALG00000006516	2.93373	-0.432163	-2.00144	0.0731877	0.542209	MTHFS	methenyltetrahydrofolate synthetase [Source:NCBI gene;Acc:415484]	10
ENSGALG00000008149	6.1406	-0.225555	-1.99995	0.0733693	0.542209	EWSR1	EWS RNA binding protein 1 [Source:NCBI gene;Acc:417022]	15
ENSGALG00000013604	-0.354625	-0.748811	-2.00044	0.0733088	0.542209	VIP	vasoactive intestinal peptide [Source:NCBI gene;Acc:396323]	3
ENSGALG00000017033	6.4207	0.343312	2.00163	0.073164	0.542209	MRPS31	mitochondrial ribosomal protein S31 [Source:NCBI gene;Acc:418887]	1
ENSGALG00000048137	1.32223	-0.72317	-2.00056	0.0732946	0.542209			2
ENSGALG00000053743	0.142487	0.672841	2.00003	0.0733599	0.542209			5
ENSGALG00000055081	5.65361	-0.339449	-1.99998	0.0733652	0.542209	SEMA4C	semaphorin-4C-like [Source:NCBI gene;Acc:107049953]	22
ENSGALG00000013940	1.33363	0.560994	1.99942	0.0734342	0.542391	LNX1	ligand of numb-protein X 1 [Source:NCBI gene;Acc:422752]	4
ENSGALG00000002987	5.97982	-0.343408	-1.99817	0.0735868	0.543222	SERPINF2	serpin family F member 2 [Source:NCBI gene;Acc:100857105]	19
ENSGALG00000004850	5.18312	-0.420655	-1.99635	0.0738108	0.543372	ZMIZ1	zinc finger MIZ-type containing 1 [Source:NCBI gene;Acc:423724]	6
ENSGALG00000005011	1.74144	0.399597	1.99657	0.0737836	0.543372		SHC adaptor protein 4 [Source:NCBI gene;Acc:426482]	10
ENSGALG00000008382	5.55095	0.235358	1.99578	0.0738808	0.543372	GNAI1	G protein subunit alpha i1 [Source:NCBI gene;Acc:396368]	1
ENSGALG00000008684	10.577	0.285814	1.99599	0.0738544	0.543372	EIF4A2	eukaryotic translation initiation factor 4A2 [Source:NCBI gene;Acc:395232]	9
ENSGALG00000027973	4.57477	0.755601	1.99571	0.0738892	0.543372	CATHL1	cathelicidin-1 [Source:NCBI gene;Acc:414337]	2
ENSGALG00000042321	6.69452	0.430771	1.99589	0.0738667	0.543372	LYN	LYN proto-oncogene	Src family tyrosine kinase [Source:NCBI gene;Acc:421127]	2
ENSGALG00000048159	4.68031	-0.275307	-1.99589	0.0738671	0.543372		taperin [Source:NCBI gene;Acc:417259]	17
ENSGALG00000001740	3.62267	-0.690118	-1.99505	0.073971	0.543523	MGAT5B	alpha-1	6-mannosylglycoprotein 6-beta-N-acetylglucosaminyltransferase B [Source:HGNC Symbol;Acc:HGNC:24140]	18
ENSGALG00000026999	6.22934	0.393037	1.99488	0.0739915	0.543523	SNRPB2	small nuclear ribonucleoprotein polypeptide B2 [Source:NCBI gene;Acc:421261]	3
ENSGALG00000035932	2.12093	-0.48175	-1.99456	0.0740307	0.543523	ZC2HC1A	zinc finger	C2HC-type containing 1A [Source:NCBI gene;Acc:769604]	2
ENSGALG00000009047	6.14565	0.224665	1.99419	0.074077	0.543567	YPEL5	yippee like 5 [Source:NCBI gene;Acc:421299]	3
ENSGALG00000005481	4.85257	0.320718	1.99235	0.0743041	0.543955	ARHGEF3	Rho guanine nucleotide exchange factor 3 [Source:NCBI gene;Acc:416000]	12
ENSGALG00000009476	7.58899	-0.266275	-1.99213	0.0743316	0.543955	CDK6	cyclin dependent kinase 6 [Source:NCBI gene;Acc:420558]	2
ENSGALG00000032199	6.17188	0.199648	1.99231	0.0743087	0.543955	FGR	FGR proto-oncogene	Src family tyrosine kinase [Source:NCBI gene;Acc:777583]	23
ENSGALG00000035287	3.50484	-0.55393	-1.99237	0.0743013	0.543955	STAM	signal transducing adaptor molecule [Source:NCBI gene;Acc:420517]	2
ENSGALG00000035464	-0.522256	-0.911706	-1.99275	0.0742542	0.543955			19
ENSGALG00000001252	-0.425276	1.24059	1.99074	0.0745032	0.544089	CREB3L3	cAMP responsive element binding protein 3 like 3 [Source:NCBI gene;Acc:428333]	28
ENSGALG00000006532	4.5148	0.391645	1.98924	0.0746901	0.544089	FOPNL	FGFR1OP N-terminal like [Source:NCBI gene;Acc:416598]	14
ENSGALG00000008520	7.55082	-0.298981	-1.98906	0.0747129	0.544089	EIF4G1	eukaryotic translation initiation factor 4 gamma 1 [Source:NCBI gene;Acc:424953]	9
ENSGALG00000009082	6.2525	-0.63744	-1.99086	0.0744887	0.544089	COQ8A	coenzyme Q8A [Source:NCBI gene;Acc:416745]	3
ENSGALG00000010940	3.58308	0.561768	1.98969	0.0746344	0.544089	ACSS3	acyl-CoA synthetase short-chain family member 3 [Source:NCBI gene;Acc:417875]	1
ENSGALG00000021314	5.11246	0.881385	1.9893	0.074682	0.544089	PLA2G10	phospholipase A2 group X [Source:NCBI gene;Acc:416425]	14
ENSGALG00000028537	7.52319	0.4252	1.99025	0.0745646	0.544089	NDUFB1	NADH:ubiquinone oxidoreductase subunit B1 [Source:NCBI gene;Acc:423415]	5
ENSGALG00000049072	3.45549	-0.294832	-1.9894	0.07467	0.544089			AADN05001268.1
ENSGALG00000054801	1.43835	1.11416	1.99137	0.0744249	0.544089			2
ENSGALG00000017926	2.05617	0.736714	1.98834	0.0748016	0.544127	7SK	7SK RNA [Source:RFAM;Acc:RF00100]	3
ENSGALG00000020479	5.92232	0.518454	1.98738	0.0749217	0.544127	SLC43A3	solute carrier family 43 member 3 [Source:NCBI gene;Acc:423133]	5
ENSGALG00000031794	6.31145	0.410052	1.98771	0.0748809	0.544127		programmed cell death 1 ligand 2 [Source:NCBI gene;Acc:427225]	Z
ENSGALG00000032780	5.05503	0.418364	1.98771	0.0748802	0.544127	TTC13	tetratricopeptide repeat domain 13 [Source:NCBI gene;Acc:421545]	3
ENSGALG00000034216	5.04827	-0.254676	-1.98737	0.0749231	0.544127	TK2	thymidine kinase 2	mitochondrial [Source:NCBI gene;Acc:427551]	11
ENSGALG00000039209	4.34174	-0.506907	-1.98707	0.0749602	0.544127	WIF1	WNT inhibitory factor 1 [Source:NCBI gene;Acc:417831]	1
ENSGALG00000001604	3.93531	-0.273363	-1.98439	0.075296	0.544565		galactosidase beta 1 like 2 [Source:NCBI gene;Acc:428238]	24
ENSGALG00000006368	1.20837	-0.605791	-1.98563	0.0751401	0.544565	PTPN5	protein tyrosine phosphatase	non-receptor type 5 [Source:NCBI gene;Acc:423085]	5
ENSGALG00000007190	8.54162	0.364463	1.98378	0.0753725	0.544565	ATP6V1G1	ATPase H+ transporting V1 subunit G1 [Source:NCBI gene;Acc:417249]	17
ENSGALG00000010542	8.95349	-0.480973	-1.98368	0.0753839	0.544565	PAPSS1	3'-phosphoadenosine 5'-phosphosulfate synthase 1 [Source:NCBI gene;Acc:422530]	4
ENSGALG00000014867	5.96393	0.300197	1.98443	0.075291	0.544565	PAIP1	poly(A) binding protein interacting protein 1 [Source:NCBI gene;Acc:427195]	Z
ENSGALG00000015649	5.42281	0.239861	1.98542	0.0751667	0.544565	NOP14	NOP14 nucleolar protein [Source:NCBI gene;Acc:422880]	4
ENSGALG00000027513	1.76951	-0.475376	-1.98394	0.0753516	0.544565	HOXD9	homeobox D9 [Source:NCBI gene;Acc:771214]	7
ENSGALG00000034001	6.45069	-0.325584	-1.98447	0.075285	0.544565	SPAG9	sperm associated antigen 9 [Source:NCBI gene;Acc:422095]	18
ENSGALG00000046894	-0.428245	0.813784	1.98379	0.0753711	0.544565			4
ENSGALG00000053241	4.09022	0.900927	1.98335	0.0754258	0.544576		uncharacterized LOC424199 [Source:NCBI gene;Acc:424199]	7
ENSGALG00000010147	6.02035	0.303328	1.98243	0.0755408	0.544687	CBWD1	COBW domain containing 1 [Source:NCBI gene;Acc:427347]	Z
ENSGALG00000012612	1.73546	0.769066	1.98227	0.0755613	0.544687	FBP2	fructose-bisphosphatase 2 [Source:NCBI gene;Acc:395217]	Z
ENSGALG00000021231	6.57622	0.373033	1.98226	0.0755623	0.544687	TMEM254	transmembrane protein 254 [Source:NCBI gene;Acc:423634]	6
ENSGALG00000000972	4.88871	-0.255576	-1.98014	0.0758293	0.545174	PBX3	PBX homeobox 3 [Source:NCBI gene;Acc:417093]	17
ENSGALG00000008162	4.79126	0.230435	1.98075	0.0757528	0.545174	FBXO18	F-box protein	helicase	18 [Source:NCBI gene;Acc:416687]	1
ENSGALG00000011305	7.20467	-0.222205	-1.97905	0.0759679	0.545174	SRSF11	serine and arginine rich splicing factor 11 [Source:NCBI gene;Acc:424714]	8
ENSGALG00000025946	4.38594	0.272193	1.98087	0.0757381	0.545174	MOB3C	MOB kinase activator 3C [Source:NCBI gene;Acc:424615]	8
ENSGALG00000029151	4.44115	0.84512	1.97943	0.0759193	0.545174	ISLR2	immunoglobulin superfamily containing leucine rich repeat 2 [Source:NCBI gene;Acc:429941]	10
ENSGALG00000036114	6.25432	-0.267047	-1.97863	0.0760206	0.545174	SMO	smoothened	frizzled class receptor [Source:NCBI gene;Acc:395949]	1
ENSGALG00000040832	3.33702	0.654057	1.97852	0.0760341	0.545174	CFD	complement factor D [Source:NCBI gene;Acc:100857593]	28
ENSGALG00000042184	4.57179	0.26638	1.98038	0.075799	0.545174	ALDH4A1	aldehyde dehydrogenase 4 family member A1 [Source:NCBI gene;Acc:419467]	21
ENSGALG00000045856	2.42686	0.450261	1.97962	0.0758957	0.545174	BBOF1	basal body orientation factor 1 [Source:NCBI gene;Acc:423344]	5
ENSGALG00000050267	6.40584	-0.40254	-1.97998	0.0758503	0.545174	CALU	calumenin-like [Source:NCBI gene;Acc:107050717]	1
ENSGALG00000001859	2.27208	-0.397563	-1.97742	0.0761738	0.545456			21
ENSGALG00000002015	-0.474225	-0.908215	-1.97561	0.0764038	0.545456	SNCG	synuclein gamma [Source:NCBI gene;Acc:395392]	6
ENSGALG00000002272	5.65571	0.192035	1.97735	0.0761819	0.545456	NOC4L	nucleolar complex associated 4 homolog [Source:NCBI gene;Acc:416798]	15
ENSGALG00000005460	3.35292	0.411697	1.97419	0.0765833	0.545456	SLCO4A1	solute carrier organic anion transporter family member 4A1 [Source:NCBI gene;Acc:419231]	20
ENSGALG00000006331	2.55563	0.435416	1.97583	0.0763747	0.545456	STAMBPL1	STAM binding protein like 1 [Source:NCBI gene;Acc:100859108]	6
ENSGALG00000009788	4.53886	0.246097	1.97676	0.0762578	0.545456	SMYD2	SET and MYND domain containing 2 [Source:NCBI gene;Acc:421361]	3
ENSGALG00000010764	3.48671	0.27334	1.97518	0.0764585	0.545456	FBXO8	F-box protein 8 [Source:NCBI gene;Acc:422565]	4
ENSGALG00000016713	5.53857	0.231839	1.9766	0.0762777	0.545456	PLA2G7	phospholipase A2 group VII [Source:NCBI gene;Acc:395816]	3
ENSGALG00000016847	4.3825	0.282709	1.97568	0.076395	0.545456	CARS2	cysteinyl-tRNA synthetase 2	mitochondrial (putative) [Source:NCBI gene;Acc:418757]	1
ENSGALG00000038152	3.59801	-0.324607	-1.97437	0.0765613	0.545456	ABCC6	ATP binding cassette subfamily C member 6 [Source:NCBI gene;Acc:416600]	14
ENSGALG00000040348	5.90556	-0.335057	-1.97651	0.0762887	0.545456	EHBP1	EH domain binding protein 1 [Source:NCBI gene;Acc:421282]	3
ENSGALG00000042481	4.25286	0.277107	1.97407	0.0765992	0.545456	FARS2	phenylalanyl-tRNA synthetase 2	mitochondrial [Source:NCBI gene;Acc:428482]	2
ENSGALG00000044678	1.4382	-0.434997	-1.97433	0.0765657	0.545456		meiotic kinetochore factor [Source:NCBI gene;Acc:771537]	13
ENSGALG00000000378	4.74134	0.919447	1.9703	0.0770803	0.545707	SLC25A37	solute carrier family 25 (mitochondrial iron transporter)	member 37 [Source:NCBI gene;Acc:419530]	22
ENSGALG00000002132	-0.191897	-1.69228	-1.97335	0.0766904	0.545707	KCNIP1	potassium voltage-gated channel interacting protein 1 [Source:NCBI gene;Acc:416173]	13
ENSGALG00000003660	2.18281	-0.552069	-1.96788	0.0773908	0.545707	FANCF	Fanconi anemia	complementation group F [Source:NCBI gene;Acc:101750641]	5
ENSGALG00000004103	0.45854	-0.823132	-1.97049	0.0770565	0.545707	FAM81A	family with sequence similarity 81 member A [Source:NCBI gene;Acc:415396]	10
ENSGALG00000004342	4.12104	0.309689	1.9692	0.0772216	0.545707	ORC6	origin recognition complex subunit 6 [Source:NCBI gene;Acc:415749]	11
ENSGALG00000005287	3.04962	-0.305685	-1.97128	0.0769556	0.545707	ZBTB47	zinc finger and BTB domain containing 47 [Source:NCBI gene;Acc:428398]	2
ENSGALG00000005706	4.6207	0.363985	1.9712	0.0769659	0.545707	HSCB	HscB mitochondrial iron-sulfur cluster cochaperone [Source:NCBI gene;Acc:768938]	15
ENSGALG00000005763	5.16468	0.347694	1.96779	0.0774026	0.545707	VILL	villin like [Source:NCBI gene;Acc:420415]	2
ENSGALG00000007680	0.309506	0.729375	1.97051	0.0770534	0.545707	ENKUR	enkurin	TRPC channel interacting protein [Source:NCBI gene;Acc:420498]	2
ENSGALG00000010347	6.25861	0.41277	1.97015	0.0771003	0.545707	CCNG2	cyclin G2 [Source:NCBI gene;Acc:422512]	4
ENSGALG00000010446	5.65168	-0.269201	-1.96753	0.0774367	0.545707	EFCAB14	EF-hand calcium binding domain 14 [Source:NCBI gene;Acc:424617]	8
ENSGALG00000011068	6.07352	-0.487969	-1.96844	0.0773194	0.545707	COBLL1	cordon-bleu WH2 repeat protein like 1 [Source:NCBI gene;Acc:424182]	7
ENSGALG00000014812	3.2913	-0.551931	-1.96786	0.0773938	0.545707	SIDT1	SID1 transmembrane family member 1 [Source:NCBI gene;Acc:418321]	1
ENSGALG00000026491	2.21597	-0.385911	-1.96886	0.077266	0.545707	TMEM17	transmembrane protein 17 [Source:NCBI gene;Acc:421284]	3
ENSGALG00000030059	3.05488	0.350822	1.9701	0.0771068	0.545707	NTAQ1	WDYHV motif containing 1 [Source:NCBI gene;Acc:420345]	2
ENSGALG00000033012	2.9491	-0.424748	-1.96831	0.0773356	0.545707	SPRY4	sprouty RTK signaling antagonist 4 [Source:HGNC Symbol;Acc:HGNC:15533]	13
ENSGALG00000036925	1.04254	-0.736012	-1.9689	0.0772597	0.545707	CADM3	cell adhesion molecule 3 [Source:NCBI gene;Acc:772356]	25
ENSGALG00000041575	3.16039	0.431199	1.97127	0.076957	0.545707	PPP1R14C	protein phosphatase 1 regulatory inhibitor subunit 14C [Source:NCBI gene;Acc:421630]	3
ENSGALG00000042895	6.01965	-0.328974	-1.96716	0.0774842	0.545707	BCAR1	BCAR1	Cas family scaffolding protein [Source:NCBI gene;Acc:415691]	11
ENSGALG00000043257	3.04936	1.2283	1.96735	0.0774593	0.545707		lysozyme g-like [Source:NCBI gene;Acc:418700]	1
ENSGALG00000053608	0.977333	-0.553166	-1.96891	0.0772584	0.545707			21
ENSGALG00000000775	6.7742	0.459272	1.96454	0.0778215	0.546361	CTSS	cathepsin S [Source:NCBI gene;Acc:425657]	25
ENSGALG00000003015	9.93728	0.710482	1.95909	0.0785291	0.546361	SERPINF1	serpin family F member 1 [Source:NCBI gene;Acc:417561]	19
ENSGALG00000003412	5.22321	-0.252712	-1.95966	0.0784545	0.546361		ral guanine nucleotide dissociation stimulator like 4 [Source:NCBI gene;Acc:427758]	17
ENSGALG00000005888	5.20825	-0.29808	-1.95565	0.0789786	0.546361	PGP	phosphoglycolate phosphatase [Source:NCBI gene;Acc:416559]	14
ENSGALG00000006804	-0.3013	0.694366	1.96288	0.0780364	0.546361	ODF2L	outer dense fiber of sperm tails 2 like [Source:NCBI gene;Acc:424524]	8
ENSGALG00000007038	2.22781	0.48286	1.9546	0.0791169	0.546361	ASTN2	astrotactin 2 [Source:NCBI gene;Acc:417242]	17
ENSGALG00000007351	6.77854	0.206542	1.96329	0.077984	0.546361	MTPAP	mitochondrial poly(A) polymerase [Source:NCBI gene;Acc:420478]	2
ENSGALG00000007931	6.99827	0.234355	1.95573	0.0789687	0.546361	DLD	dihydrolipoamide dehydrogenase [Source:NCBI gene;Acc:417699]	1
ENSGALG00000008597	6.23539	0.33933	1.95538	0.0790144	0.546361		mitochondrial ribosomal protein L2 [Source:NCBI gene;Acc:421256]	3
ENSGALG00000011394	3.15243	0.508861	1.95646	0.0788731	0.546361	CYP2J21	cytochrome P450	family 2	subfamily J	polypeptide 21 [Source:NCBI gene;Acc:101750603]	8
ENSGALG00000012659	8.51362	-0.380682	-1.96095	0.0782877	0.546361	CKAP4	cytoskeleton associated protein 4 [Source:NCBI gene;Acc:418073]	1
ENSGALG00000013879	6.50841	-0.234212	-1.96075	0.0783133	0.546361	TIA1	TIA1 cytotoxic granule associated RNA binding protein [Source:NCBI gene;Acc:771327]	22
ENSGALG00000014569	4.16496	0.727064	1.95515	0.0790451	0.546361	PNPLA2	patatin like phospholipase domain containing 2 [Source:NCBI gene;Acc:431066]	5
ENSGALG00000014776	4.39443	-0.365539	-1.9652	0.0777368	0.546361	TBX15	T-box 15 [Source:NCBI gene;Acc:418313]	1
ENSGALG00000014799	3.36074	0.287176	1.95497	0.079068	0.546361	METTL4	methyltransferase like 4 [Source:NCBI gene;Acc:421056]	2
ENSGALG00000014981	6.3123	0.331229	1.95457	0.0791208	0.546361	COX17	COX17	cytochrome c oxidase copper chaperone [Source:NCBI gene;Acc:770190]	1
ENSGALG00000015275	3.8547	-0.458372	-1.95637	0.0788853	0.546361	NIT2	nitrilase family member 2 [Source:NCBI gene;Acc:418386]	1
ENSGALG00000015372	7.61636	0.275333	1.95842	0.0786164	0.546361	ATP5I	ATP synthase	H+ transporting	mitochondrial Fo complex subunit E [Source:NCBI gene;Acc:769146]	Z
ENSGALG00000016258	1.30846	-0.892542	-1.9561	0.0789203	0.546361	SYTL5	synaptotagmin like 5 [Source:NCBI gene;Acc:427990]	1
ENSGALG00000020419	5.86396	0.254305	1.95853	0.0786029	0.546361	LIN52	lin-52 DREAM MuvB core complex component [Source:NCBI gene;Acc:423346]	5
ENSGALG00000020626	3.68679	0.313819	1.96016	0.0783897	0.546361		PQ loop repeat containing 2 like [Source:NCBI gene;Acc:425021]	9
ENSGALG00000025950	7.14174	-0.546132	-1.96043	0.0783543	0.546361	PRKCA	protein kinase C alpha [Source:NCBI gene;Acc:417430]	18
ENSGALG00000027428	5.52368	0.326004	1.96161	0.0782014	0.546361	ZDHHC21	zinc finger DHHC-type containing 21 [Source:NCBI gene;Acc:427356]	Z
ENSGALG00000029571	4.31513	0.299366	1.96325	0.0779884	0.546361	TMEM55A	transmembrane protein 55A [Source:NCBI gene;Acc:420221]	2
ENSGALG00000030303	1.98855	-0.401842	-1.96122	0.0782518	0.546361	PPP1R3B	protein phosphatase 1 regulatory subunit 3B [Source:NCBI gene;Acc:422630]	4
ENSGALG00000030397	4.38748	0.564355	1.96403	0.0778882	0.546361	TRIM27.1	tripartite motif containing 27.1 [Source:NCBI gene;Acc:417042]	16
ENSGALG00000031067	5.99269	-0.242224	-1.95429	0.079157	0.546361	TMEM132A	transmembrane protein 132A [Source:NCBI gene;Acc:107053338]	5
ENSGALG00000031763	2.72797	0.449585	1.95788	0.0786867	0.546361	EDARADD	EDAR associated death domain [Source:NCBI gene;Acc:497625]	3
ENSGALG00000032640	5.21123	-0.348978	-1.96239	0.0780999	0.546361	CRIM1	cysteine rich transmembrane BMP regulator 1 [Source:NCBI gene;Acc:395067]	3
ENSGALG00000033656	4.37928	0.313253	1.96007	0.0784013	0.546361	DQX1	DEAQ-box RNA dependent ATPase 1 [Source:NCBI gene;Acc:100859193]	4
ENSGALG00000034788	4.38888	-0.289479	-1.96082	0.0783039	0.546361	PHLDA1	pleckstrin homology like domain family A member 1 [Source:HGNC Symbol;Acc:HGNC:8933]	1
ENSGALG00000036539	5.76662	-0.260826	-1.96215	0.0781315	0.546361	EFNB1	ephrin B1 [Source:NCBI gene;Acc:395896]	4
ENSGALG00000036901	3.23488	-0.561611	-1.95809	0.0786601	0.546361	TSPAN18	tetraspanin 18 [Source:NCBI gene;Acc:395586]	5
ENSGALG00000038943	4.35227	0.473537	1.96173	0.0781864	0.546361	RASSF5	Ras association domain family member 5 [Source:NCBI gene;Acc:419844]	26
ENSGALG00000041949	3.43257	0.337329	1.95479	0.0790924	0.546361	AAMDC	adipogenesis associated	Mth938 domain containing [Source:NCBI gene;Acc:425610]	1
ENSGALG00000043725	7.52122	-0.295556	-1.95579	0.0789608	0.546361		piezo type mechanosensitive ion channel component 1 [Source:NCBI gene;Acc:415849]	11
ENSGALG00000043787	4.24026	0.341718	1.96525	0.0777302	0.546361	DEPDC6	DEP domain containing 6 [Source:NCBI gene;Acc:420357]	2
ENSGALG00000053172	-0.103311	0.689408	1.95985	0.078431	0.546361			1
ENSGALG00000053597	7.01293	-0.226177	-1.95688	0.0788178	0.546361	MBNL3	muscleblind like splicing regulator 3 [Source:NCBI gene;Acc:422233]	4
ENSGALG00000002587	4.77153	-0.329441	-1.95366	0.0792399	0.546654	CRCP	CGRP receptor component [Source:NCBI gene;Acc:396022]	19
ENSGALG00000042986	2.63473	0.5633	1.95322	0.0792978	0.546774	RNASEL	ribonuclease L [Source:NCBI gene;Acc:424410]	8
ENSGALG00000026031	4.54872	0.345915	1.95229	0.0794201	0.546845	ZNHIT3	zinc finger HIT-type containing 3 [Source:NCBI gene;Acc:100859083]	19
ENSGALG00000037727	3.54268	-0.433296	-1.95279	0.0793543	0.546845	OSGEPL1	O-sialoglycoprotein endopeptidase like 1 [Source:NCBI gene;Acc:423982]	7
ENSGALG00000050893	4.47248	0.590063	1.95222	0.0794297	0.546845	CCR2	C-C motif chemokine receptor 2 [Source:NCBI gene;Acc:420696]	2
ENSGALG00000001171	3.38306	-0.333816	-1.94945	0.0797953	0.547963	SEMA6B	semaphorin 6B [Source:NCBI gene;Acc:428330]	28
ENSGALG00000010039	6.73385	0.268757	1.95012	0.0797075	0.547963	BRE	brain and reproductive organ-expressed (TNFRSF1A modulator) [Source:NCBI gene;Acc:421417]	3
ENSGALG00000015356	4.26239	-0.438604	-1.94975	0.0797556	0.547963	IFT57	intraflagellar transport 57 [Source:NCBI gene;Acc:418409]	1
ENSGALG00000037129	2.70901	0.427971	1.95004	0.0797172	0.547963	FAM241A	family with sequence similarity 241 member A [Source:HGNC Symbol;Acc:HGNC:26813]	4
ENSGALG00000040755	4.029	0.44022	1.95025	0.0796898	0.547963	ANGPT4	angiopoietin 4 [Source:NCBI gene;Acc:771763]	20
ENSGALG00000001992	9.23703	-0.430746	-1.94556	0.0803119	0.548504	PKLR	pyruvate kinase	liver and RBC [Source:NCBI gene;Acc:396456]	10
ENSGALG00000002764	8.89575	0.225726	1.94436	0.0804718	0.548504	ATP1B3	ATPase Na+/K+ transporting subunit beta 3 [Source:NCBI gene;Acc:396549]	9
ENSGALG00000003294	4.35852	0.28825	1.94456	0.0804448	0.548504	ATAD5	ATPase family	AAA domain containing 5 [Source:NCBI gene;Acc:417408]	18
ENSGALG00000004881	6.95485	-0.214882	-1.94579	0.0802814	0.548504		golgin A2 [Source:NCBI gene;Acc:427766]	17
ENSGALG00000007203	7.19836	0.246148	1.9453	0.0803467	0.548504	RAB3IL1	RAB3A interacting protein like 1 [Source:NCBI gene;Acc:423123]	5
ENSGALG00000007905	7.24306	-0.28207	-1.9459	0.0802673	0.548504	LAMB1	laminin subunit beta 1 [Source:NCBI gene;Acc:396478]	1
ENSGALG00000008155	2.2787	0.35698	1.9451	0.0803733	0.548504	KCTD18	potassium channel tetramerization domain containing 18 [Source:NCBI gene;Acc:424069]	7
ENSGALG00000009525	5.20934	0.303972	1.94427	0.0804842	0.548504	HAT1	histone acetyltransferase 1 [Source:NCBI gene;Acc:374037]	7
ENSGALG00000015297	4.67892	-0.303294	-1.94769	0.0800293	0.548504		forkhead box O3 [Source:NCBI gene;Acc:421769]	3
ENSGALG00000016446	7.21544	0.303615	1.94443	0.0804628	0.548504	ATP6V1C2	ATPase H+ transporting V1 subunit C2 [Source:NCBI gene;Acc:421939]	3
ENSGALG00000020210	3.4391	0.364514	1.94735	0.0800739	0.548504	CENPU	centromere protein U [Source:NCBI gene;Acc:422548]	4
ENSGALG00000021158	-0.480247	-0.80863	-1.94548	0.0803227	0.548504	SLC7A9	solute carrier family 7 member 9 [Source:NCBI gene;Acc:415768]	11
ENSGALG00000039156	2.51776	0.50934	1.94499	0.0803876	0.548504		RAS protein activator like 3 [Source:NCBI gene;Acc:101747651]	30
ENSGALG00000043681	3.68862	0.629542	1.94575	0.0802863	0.548504	DAPP1	dual adaptor of phosphotyrosine and 3-phosphoinositides [Source:NCBI gene;Acc:425211]	4
ENSGALG00000054946	-0.586794	1.64206	1.94815	0.0799682	0.548504			Z
ENSGALG00000001441	6.70049	0.270973	1.93916	0.0811688	0.548901	UBE2G1	ubiquitin conjugating enzyme E2 G1 [Source:NCBI gene;Acc:770961]	19
ENSGALG00000003580	9.77028	-0.451706	-1.93719	0.0814334	0.548901	MMP2	matrix metallopeptidase 2 [Source:NCBI gene;Acc:386583]	11
ENSGALG00000004247	-0.42873	-0.741896	-1.94003	0.0810516	0.548901	MORN3	MORN repeat containing 3 [Source:NCBI gene;Acc:100858736]	15
ENSGALG00000005897	4.64908	0.256252	1.93475	0.0817633	0.548901	HMCES	5-hydroxymethylcytosine (hmC) binding	ES cell-specific [Source:NCBI gene;Acc:416015]	12
ENSGALG00000006401	6.50006	-0.275189	-1.93481	0.0817554	0.548901	OSBPL5	oxysterol binding protein like 5 [Source:NCBI gene;Acc:770816]	5
ENSGALG00000008169	7.66614	-0.323522	-1.93769	0.0813667	0.548901	GDI1	GDP dissociation inhibitor 1 [Source:NCBI gene;Acc:395854]	1
ENSGALG00000008905	1.9071	-0.69384	-1.941	0.0809217	0.548901	HABP2	hyaluronan binding protein 2 [Source:NCBI gene;Acc:423898]	6
ENSGALG00000008933	4.01361	0.68939	1.93752	0.0813887	0.548901	CASP7	caspase 7 [Source:NCBI gene;Acc:423901]	6
ENSGALG00000009129	5.53125	0.23717	1.93784	0.0813457	0.548901	DLX5	distal-less homeobox 5 [Source:NCBI gene;Acc:373969]	2
ENSGALG00000009556	4.98465	-0.509744	-1.93637	0.0815448	0.548901	PRICKLE1	prickle planar cell polarity protein 1 [Source:NCBI gene;Acc:417793]	1
ENSGALG00000009634	5.78471	0.196353	1.93489	0.0817439	0.548901	GFM1	G elongation factor mitochondrial 1 [Source:NCBI gene;Acc:425018]	9
ENSGALG00000010804	5.41559	0.280564	1.93808	0.0813137	0.548901	ANKMY2	ankyrin repeat and MYND domain containing 2 [Source:NCBI gene;Acc:420593]	2
ENSGALG00000011840	6.04192	0.372063	1.9416	0.080841	0.548901	PPP2R5E	protein phosphatase 2 regulatory subunit B'epsilon [Source:NCBI gene;Acc:423512]	5
ENSGALG00000012998	4.92271	-0.433099	-1.93504	0.0817247	0.548901	WNT5B	Wnt family member 5B [Source:NCBI gene;Acc:418154]	1
ENSGALG00000013981	5.13344	0.254191	1.93592	0.0816055	0.548901	TBPL1	TATA-box binding protein like 1 [Source:NCBI gene;Acc:395517]	3
ENSGALG00000014859	4.40096	0.3067	1.93491	0.0817415	0.548901	ZNF131	zinc finger protein 131 [Source:NCBI gene;Acc:431588]	Z
ENSGALG00000015407	2.43118	0.478423	1.93913	0.0811722	0.548901	PLAG1	PLAG1 zinc finger [Source:NCBI gene;Acc:429484]	2
ENSGALG00000016227	3.93088	0.874886	1.94291	0.080666	0.548901	GPR34	G protein-coupled receptor 34 [Source:NCBI gene;Acc:771199]	1
ENSGALG00000026092	1.92086	0.612317	1.93911	0.0811751	0.548901		histamine H3 receptor-like [Source:NCBI gene;Acc:428525]	2
[truncated: 11,489 more rows]

## Sheet: Table_S4
Table S4. Functional annotation of DE genes according David database and ShinyGO tools.
Category	Tipo	Term	Description	Count	%	P-Value	Gene symbol	Ensembl Gene ID	List Total	Pop Hits	Pop Total	Fold Enrichment
DAVID DATABASE
GOTERM_BP_FAT	BP	GO:0007166	cell surface receptor signaling pathway	11	30.5556	0.000349375	ASPN, GDF10, TNMD, LEPR, FBN2, BOC, ABD2B, SCUBE2,GFRA2, AMER3, SHISA3	ENSGALG00000011058, ENSGALG00000027655, ENSGALG00000014686, ENSGALG00000041501, ENSGALG00000032856, ENSGALG00000005985, ENSGALG00000006821, ENSGALG00000004722, ENSGALG00000015152, ENSGALG00000045153, ENSGALG00000032161	24	1364	10324	3.46909
GOTERM_BP_FAT	BP	GO:0001503	ossification	5	13.8889	0.00112629	ASPN, GDF10, FBN2, PTHLH, SCUBE2	ENSGALG00000014686, ENSGALG00000005985, ENSGALG00000004722, ENSGALG00000017295, ENSGALG00000032161	24	212	10324	10.1454
GOTERM_BP_FAT	BP	GO:0001649	osteoblast differentiation	4	11.1111	0.00223479	GDF10, FBN2, PTHLH, SCUBE2	ENSGALG00000014686, ENSGALG00000005985, ENSGALG00000017295, ENSGALG00000032161	24	119	10324	14.4594
GOTERM_BP_FAT	BP	GO:0051093	negative regulation of developmental process	6	16.6667	0.00414387	ANGPTL7, ASPN, GDF10, TNMD, LEPR, PTHLH	ENSGALG00000011058, ENSGALG00000003179, ENSGALG00000005985, ENSGALG00000006821, ENSGALG00000004722, ENSGALG00000017295	24	497	10324	5.19316
GOTERM_BP_FAT	BP	GO:0051241	negative regulation of multicellular organismal process	6	16.6667	0.00656725	ANGPTL7, ASPN, GDF10, TNMD, LEPR, PTHLH	ENSGALG00000011058, ENSGALG00000003179, ENSGALG00000005985, ENSGALG00000006821, ENSGALG00000004722, ENSGALG00000017295	24	554	10324	4.65884
GOTERM_BP_FAT	BP	GO:0030282	bone mineralization	3	8.33333	0.00752041	ASPN, FBN2, PTHLH	ENSGALG00000014686, ENSGALG00000004722, ENSGALG00000017295	24	59	10324	21.8729
GOTERM_BP_FAT	BP	GO:0035265	organ growth	3	8.33333	0.0119367	LEPR,BNC2, PTHLH	ENSGALG00000011058, ENSGALG00000015101, ENSGALG00000017295	24	75	10324	17.2067
GOTERM_BP_FAT	BP	GO:0045667	regulation of osteoblast differentiation	3	8.33333	0.0141513	GDF10, FBN2, SCUBE2	ENSGALG00000014686, ENSGALG00000005985, ENSGALG00000032161	24	82	10324	15.7378
GOTERM_BP_FAT	BP	GO:0031214	biomineral tissue development	3	8.33333	0.0148144	ASPN, FBN2, PTHLH	ENSGALG00000014686, ENSGALG00000004722, ENSGALG00000017295	24	84	10324	15.3631
GOTERM_BP_FAT	BP	GO:0090288	negative regulation of cellular response to growth factor stimulus	3	8.33333	0.0229602	ASPN, FBN2, TNMD	ENSGALG00000014686, ENSGALG00000006821, ENSGALG00000004722	24	106	10324	12.1745
GOTERM_BP_FAT	BP	GO:0001525	angiogenesis	4	11.1111	0.0229682	ANGPTL7, TNMD, LEPR, COL8A1	ENSGALG00000011058, ENSGALG00000003179, ENSGALG00000015253, ENSGALG00000006821	24	278	10324	6.18945
GOTERM_BP_FAT	BP	GO:0009887	animal organ morphogenesis	5	13.8889	0.0259522	BGN, LRIG3, FBN2, PTHLH, SCUBE2	ENSGALG00000014686, ENSGALG00000009755, ENSGALG00000004722, ENSGALG00000017295, ENSGALG00000032161	24	518	10324	4.15219
GOTERM_BP_FAT	BP	GO:0007423	sensory organ development	4	11.1111	0.0270318	ANGPTL7, LRIG3, FBN2, BNC2	ENSGALG00000014686, ENSGALG00000009755, ENSGALG00000003179, ENSGALG00000015101	24	296	10324	5.81306
GOTERM_BP_FAT	BP	GO:0007167	enzyme linked receptor protein signaling pathway	5	13.8889	0.0303923	FBN2, GFRA2, GDF10, TNMD, ASPN	ENSGALG00000014686, ENSGALG00000032856, ENSGALG00000005985, ENSGALG00000006821, ENSGALG00000004722	24	544	10324	3.95374
GOTERM_BP_FAT	BP	GO:0030278	regulation of ossification	3	8.33333	0.0320939	FBN2, GDF10, FBN2, SCUBE2	ENSGALG00000014686, ENSGALG00000005985, ENSGALG00000032161	24	127	10324	10.1614
GOTERM_BP_FAT	BP	GO:0048514	blood vessel morphogenesis	4	11.1111	0.0368091	ANGPTL7, TNMD, LEPR, COL8A1	ENSGALG00000011058, ENSGALG00000003179, ENSGALG00000015253, ENSGALG00000006821	24	334	10324	5.1517
GOTERM_BP_FAT	BP	GO:0048646	anatomical structure formation involved in morphogenesis	5	13.8889	0.0374605	ANGPTL7, TNMD, LEPR, FBN2, COL8A1	ENSGALG00000011058, ENSGALG00000014686, ENSGALG00000003179, ENSGALG00000015253, ENSGALG00000006821	24	581	10324	3.70195
GOTERM_BP_FAT	BP	GO:0048705	skeletal system morphogenesis	3	8.33333	0.0419076	FBN2, PTHLH, SCUBE2	ENSGALG00000014686, ENSGALG00000017295, ENSGALG00000032161	24	147	10324	8.77891
GOTERM_BP_FAT	BP	GO:0048585	negative regulation of response to stimulus	6	16.6667	0.0465265	ASPN, TNMD, LEPR, FBN2, TRABD2B, SHISA3	ENSGALG00000011058, ENSGALG00000027655, ENSGALG00000014686, ENSGALG00000006821, ENSGALG00000004722, ENSGALG00000045153	24	910	10324	2.83626
GOTERM_BP_FAT	BP	GO:0090092	regulation of transmembrane receptor protein serine/threonine kinase signaling pathway	3	8.33333	0.0482742	ASPN, GDF10, FBN2, SHISA3	ENSGALG00000014686, ENSGALG00000005985, ENSGALG00000004722	24	159	10324	8.11635
GOTERM_MF_FAT	MF	GO:0005201	extracellular matrix structural constituent	5	13.8889	3.27508e-06	FBN2, COL8A1, ELN, COL16A1	ENSGALG00000032220, ENSGALG00000054999, ENSGALG00000014686, ENSGALG00000015253, ENSGALG00000026836	19	58	9725	44.1243
GOTERM_MF_FAT	MF	GO:0005198	structural molecule activity	5	13.8889	0.00327678	FBN2, COL8A1, ELN, COL16A1	ENSGALG00000032220, ENSGALG00000054999, ENSGALG00000014686, ENSGALG00000015253, ENSGALG00000026836	19	347	9725	7.37525
GOTERM_MF_FAT	MF	GO:0005509	calcium ion binding	4	11.1111	0.029561	ASPN, MASP1, FBN2, SCUBE2	ENSGALG00000014686, ENSGALG00000004722, ENSGALG00000007419, ENSGALG00000032161	19	372	9725	5.50368
GOTERM_CC_FAT	CC	GO:0005576	extracellular region	15	41.6667	4.01026e-09	ANGPTL7, ASPN, C1QTNF8, GDF10, XYLT1, MASP1, FBN2, COL8A1, ANGPTL5, PTHLH	ENSGALG00000017191, ENSGALG00000054999, ENSGALG00000003179, ENSGALG00000015253, ENSGALG00000005985, ENSGALG00000004722, ENSGALG00000026836, ENSGALG00000006757, ENSGALG00000017295, ENSGALG00000032161, ENSGALG00000007419, ENSGALG00000032220, ENSGALG00000005253, ENSGALG00000014686, ENSGALG00000037675	23	991	9128	6.00711
GOTERM_CC_FAT	CC	GO:0005615	extracellular space	11	30.5556	5.20116e-07	ANGPTL7, ASPN, GDF10, XYLT1, MASP1, COL8A1, ANGPTL5, SCUBE2, COL14A1, COL16A1	ENSGALG00000017191, ENSGALG00000054999, ENSGALG00000037675, ENSGALG00000003179, ENSGALG00000015253, ENSGALG00000005985, ENSGALG00000004722, ENSGALG00000026836, ENSGALG00000006757, ENSGALG00000007419, ENSGALG00000032161	23	611	9128	7.14495
GOTERM_CC_FAT	CC	GO:0044421	extracellular region part	12	33.3333	8.0442e-07	ANGPTL7, ASPN, GDF10, XYLT1, MASP1, FBN2, COL8A1, ANGPTL5, SCUBE2, COL16A1	ENSGALG00000017191, ENSGALG00000054999, ENSGALG00000014686, ENSGALG00000037675, ENSGALG00000003179, ENSGALG00000015253, ENSGALG00000005985, ENSGALG00000004722, ENSGALG00000026836, ENSGALG00000006757, ENSGALG00000007419, ENSGALG00000032161	23	820	9128	5.80785
GOTERM_CC_FAT	CC	GO:0031012	extracellular matrix	6	16.6667	0.000162678	ASPN, FBN2, COL8A1, COL14A1, COL16A1	ENSGALG00000054999, ENSGALG00000014686, ENSGALG00000037675, ENSGALG00000015253, ENSGALG00000004722, ENSGALG00000026836	23	225	9128	10.5832
INTERPRO	INTERPRO	IPR003961	Fibronectin, type III	9	25	5.79032e-09	LEPR, FNDC1, BOC, COL14A1	ENSGALG00000015307, ENSGALG00000011663, ENSGALG00000011058, ENSGALG00000037675, ENSGALG00000049529, ENSGALG00000015152	35	147	12005	21
INTERPRO	INTERPRO	IPR013783	Immunoglobulin-like fold	11	30.5556	9.31569e-07	LRIG3, LEPR, FNDC1, BOC, COL14A1	ENSGALG00000015307, ENSGALG00000011663, ENSGALG00000011058, ENSGALG00000037675, ENSGALG00000009755, ENSGALG00000054344, ENSGALG00000049529, ENSGALG00000015152	35	511	12005	7.38356
INTERPRO	INTERPRO	IPR008160	Collagen triple helix repeat	4	11.1111	0.000840821	C1QTNF8, COL8A1, COL14A1, COL16A1	ENSGALG00000005253, ENSGALG00000037675, ENSGALG00000015253, ENSGALG00000026836	35	66	12005	20.7879
INTERPRO	INTERPRO	IPR018097	EGF-like calcium-binding, conserved site	3	8.33333	0.0175829	MASP1, FBN2, SCUBE2	ENSGALG00000014686, ENSGALG00000007419, ENSGALG00000032161	35	72	12005	14.2917
INTERPRO	INTERPRO	IPR001881	EGF-like calcium-binding	3	8.33333	0.0261462	MASP1, FBN2, SCUBE2	ENSGALG00000014686, ENSGALG00000007419, ENSGALG00000032161	35	89	12005	11.5618
INTERPRO	INTERPRO	IPR003598	Immunoglobulin subtype 2	3	8.33333	0.0535503	LRIG3, BOC	ENSGALG00000009755, ENSGALG00000054344, ENSGALG00000015152	35	132	12005	7.79545
INTERPRO	INTERPRO	IPR000742	Epidermal growth factor-like domain	3	8.33333	0.0774926	MASP1, FBN2, SCUBE2	ENSGALG00000014686, ENSGALG00000007419, ENSGALG00000032161	35	163	12005	6.31288
ShinyGO
AMIGO	BP	GO:0098868	Bone growth	3		0.00578007	LEPR, BNC2 , PTHLH	ENSGALG00000011058, ENSGALG00000015101, ENSGALG00000017295				18
AMIGO	BP	GO:0001649	Osteoblast differentiation	4		0.0384239	FBN2, PTHLH, SCUBE2	ENSGALG00000017295 , ENSGALG00000014686, ENSGALG00000032161				120
AMIGO	BP	GO:0001503	Ossification	5		0.0384239	ASPN, FBN2, PTHLH, SCUBE2	ENSGALG00000017295 , ENSGALG00000014686, ENSGALG00000032161, ENSGALG00000004722				209
KEGG		gga04340	Hedgehog signaling pathway	2		0.049429	BOC, SCUBE2	ENSGALG00000015152, ENSGALG00000032161				45

## Sheet: Table_S5
Table S5. SNPs associated with femoral head separation in broilers.
Chromosome	SNP	Minor allele name	Frequency of allele in cases	Frequency of allele in controls	Major allele name	P-value	Odds Ratio	L95	U95	Empirical p-value	Number of permutations
2	2:23307098	A	0.03333	0.5556	C	0.0000308	0.02759	0.003058	0.2489	0.00004691	490291
3	3:16824258	C	0.03333	0.4444	G	0.0004111	0.0431	0.004778	0.3889	0.00005369	735710
4	4:46304089	T	0.5333	0	A	0.0001478	NA	NA	NA	0.0000995	1000000
4	4:46315234	A	0.5333	0	G	0.0001478	NA	NA	NA	0.0000995	1000000
4	4:46318356	A	0.5333	0	G	0.0001478	NA	NA	NA	0.0000995	1000000
4	4:46318416	C	0.5333	0	T	0.0001478	NA	NA	NA	0.0000995	1000000
4	4:82213680	G	0.1667	0.7222	A	0.0001186	0.07692	0.0188	0.3148	0.000092	1000000
4	4:82216997	C	0.1667	0.7222	T	0.0001186	0.07692	0.0188	0.3148	0.000092	1000000
5	5:38228766	A	0.03333	0.5625	G	0.0000341	0.02682	0.002899	0.2481	0.0000281	160127
13	13:5487116	C	0.1667	0.7778	G	0.00002772	0.05714	0.01316	0.2482	0.00005413	757478
13	13:5487611	G	0.1667	0.7778	A	0.00002772	0.05714	0.01316	0.2482	0.00005413	757478
20	20:10404280	A	0.6071	0.1111	G	0.0008542	12.36	2365	64.64	0.00003559	252857
L95: Lower bound of 95% confidence interval for odds ratio
U95: Upper bound of 95% confidence interval for odds ratio

## Sheet: Table_S6
Table S6. Complete annotation SNPs associated with femoral head separation in broilers.
Location	Allele	Consequence	IMPACT	SYMBOL	Gene	Feature_type	Feature	BIOTYPE	EXON	INTRON	cDNA_position	CDS_position	Protein_position	Amino_acids	Codons	Existing_variation	STRAND	SYMBOL_SOURCE	HGNC_ID	CANONICAL	APPRIS	SIFT	DOMAINS	BLOSUM62	PHENOTYPES
13:5487116-5487116	G	synonymous_variant	LOW	RARS	ENSGALG00000001850	Transcript	ENSGALT00000074629.2	protein_coding	16/16	-	2874	1911	637	L	ctG/ctC	rs731914727	-1	EntrezGene	-	YES	P1	-	Gene3D:1.10.730.10,HAMAP:MF_00123,Pfam:PF05746,PANTHER:PTHR11956,SMART:SM00836,Superfamily:SSF47323,TIGRFAM:TIGR00456	-	Breast_muscle_pH+Animal_QTLdb+157215,Testes_percentage+Animal_QTLdb+147741,Testes_weight+Animal_QTLdb+147740
13:5487611-5487611	A	synonymous_variant	LOW	RARS	ENSGALG00000001850	Transcript	ENSGALT00000074629.2	protein_coding	15/16	-	2740	1777	593	L	Ctg/Ttg	rs313172659	-1	EntrezGene	-	YES	P1	-	Gene3D:1.10.730.10,HAMAP:MF_00123,Pfam:PF05746,PANTHER:PTHR11956,SMART:SM00836,Superfamily:SSF47323,TIGRFAM:TIGR00456	-	-
2:23307098-23307098	C	synonymous_variant	LOW	TFPI2	ENSGALG00000009512	Transcript	ENSGALT00000015485.6	protein_coding	02/05	-	171	171	57	L	ctT/ctG	-	-1	HGNC	HGNC:11761	-	A2	-	CDD:cd00109,Pfam:PF00014,SMART:SM00131,Superfamily:SSF57362,PANTHER:PTHR10083,PANTHER:PTHR10083:SF352,Gene3D:4.10.410.10,PROSITE_profiles:PS50279	-	Fear-tonic_immobility_duration+Animal_QTLdb+171246,Feather-crested_head+Animal_QTLdb+127112,Wattles_weight+Animal_QTLdb+127117,Fear-tonic_immobility_duration+Animal_QTLdb+171246,Feather-crested_head+Animal_QTLdb+127112,Wattles_weight+Animal_QTLdb+127117
2:23307098-23307098	C	synonymous_variant	LOW	TFPI2	ENSGALG00000009512	Transcript	ENSGALT00000100485.1	protein_coding	02/04	-	177	177	59	L	ctT/ctG	-	-1	HGNC	HGNC:11761	-	A2	-	Gene3D:4.10.410.10,PROSITE_profiles:PS50279,CDD:cd00109,Pfam:PF00014,SMART:SM00131,Superfamily:SSF57362,PANTHER:PTHR10083,PANTHER:PTHR10083:SF352	-	Fear-tonic_immobility_duration+Animal_QTLdb+171246,Feather-crested_head+Animal_QTLdb+127112,Wattles_weight+Animal_QTLdb+127117,Fear-tonic_immobility_duration+Animal_QTLdb+171246,Feather-crested_head+Animal_QTLdb+127112,Wattles_weight+Animal_QTLdb+127117
2:23307098-23307098	C	synonymous_variant	LOW	TFPI2	ENSGALG00000009512	Transcript	ENSGALT00000102159.1	protein_coding	02/05	-	252	135	45	L	ctT/ctG	-	-1	HGNC	HGNC:11761	YES	P5	-	Gene3D:4.10.410.10,PROSITE_profiles:PS50279,CDD:cd00109,Pfam:PF00014,PIRSF:PIRSF001620,SMART:SM00131,Superfamily:SSF57362,PANTHER:PTHR10083,PANTHER:PTHR10083:SF352	-	Fear-tonic_immobility_duration+Animal_QTLdb+171246,Feather-crested_head+Animal_QTLdb+127112,Wattles_weight+Animal_QTLdb+127117,Fear-tonic_immobility_duration+Animal_QTLdb+171246,Feather-crested_head+Animal_QTLdb+127112,Wattles_weight+Animal_QTLdb+127117
20:10404280-10404280	G	missense_variant	MODERATE	TTI1	ENSGALG00000006791	Transcript	ENSGALT00000010982.6	protein_coding	02/07	-	2311	2311	771	I/V	Atc/Gtc	-	1	HGNC	HGNC:29029	-	A2	-	PANTHER:PTHR18460,Superfamily:SSF48371	3	Body_weight_84_days+Animal_QTLdb+135720,Shank_length+Animal_QTLdb+135721,Eggshell_color+Animal_QTLdb+24960
20:10404280-10404280	G	missense_variant	MODERATE	TTI1	ENSGALG00000006791	Transcript	ENSGALT00000097681.1	protein_coding	02/08	-	2243	2191	731	I/V	Atc/Gtc	-	1	HGNC	HGNC:29029	YES	P5	-	PIRSF:PIRSF005250,PANTHER:PTHR18460,Superfamily:SSF48371	3	Body_weight_84_days+Animal_QTLdb+135720,Shank_length+Animal_QTLdb+135721,Eggshell_color+Animal_QTLdb+24960
20:10404280-10404280	G	missense_variant	MODERATE	TTI1	ENSGALG00000006791	Transcript	ENSGALT00000099850.1	protein_coding	01/06	-	2311	2311	771	I/V	Atc/Gtc	-	1	HGNC	HGNC:29029	-	A2	-	PIRSF:PIRSF005250,PANTHER:PTHR18460,Superfamily:SSF48371	3	Body_weight_84_days+Animal_QTLdb+135720,Shank_length+Animal_QTLdb+135721,Eggshell_color+Animal_QTLdb+24960
3:16824258-16824258	G	intron_variant	MODIFIER	MAP4K3	ENSGALG00000039720	Transcript	ENSGALT00000050515.2	protein_coding	-	02/26	-	-	-	-	-	-	-1	HGNC	HGNC:6865	-	-	-	-	-	Comb_weight+Animal_QTLdb+127114,Comb_weight+Animal_QTLdb+127114
3:16824258-16824258	G	intron_variant	MODIFIER	MAP4K3	ENSGALG00000039720	Transcript	ENSGALT00000050517.2	protein_coding	-	03/28	-	-	-	-	-	-	-1	HGNC	HGNC:6865	YES	P1	-	-	-	Comb_weight+Animal_QTLdb+127114,Comb_weight+Animal_QTLdb+127114
4:46304089-46304089	A	synonymous_variant	LOW	LIN54	ENSGALG00000011133	Transcript	ENSGALT00000018147.7	protein_coding	03/13	-	938	903	301	T	acT/acA	rs16402022	1	HGNC	HGNC:25397	YES	P5	-	PANTHER:PTHR12446,PANTHER:PTHR12446:SF36	-	Ileum_weight+Animal_QTLdb+96634
4:46304089-46304089	A	synonymous_variant	LOW	LIN54	ENSGALG00000011133	Transcript	ENSGALT00000076119.3	protein_coding	04/13	-	1058	903	301	T	acT/acA	rs16402022	1	HGNC	HGNC:25397	-	A2	-	PANTHER:PTHR12446,PANTHER:PTHR12446:SF36	-	Ileum_weight+Animal_QTLdb+96634
4:46315234-46315234	G	synonymous_variant	LOW	LIN54	ENSGALG00000011133	Transcript	ENSGALT00000018147.7	protein_coding	13/13	-	2261	2226	742	T	acA/acG	rs15563870	1	HGNC	HGNC:25397	YES	P5	-	PANTHER:PTHR12446,PANTHER:PTHR12446:SF36	-	-
4:46315234-46315234	G	synonymous_variant	LOW	LIN54	ENSGALG00000011133	Transcript	ENSGALT00000076119.3	protein_coding	13/13	-	2225	2070	690	T	acA/acG	rs15563870	1	HGNC	HGNC:25397	-	A2	-	PANTHER:PTHR12446,PANTHER:PTHR12446:SF36	-	-
4:46318356-46318356	G	intergenic_variant	MODIFIER	-	-	-	-	-	-	-	-	-	-	-	-	rs316102376	-	-	-	-	-	-	-	-	-
4:46318416-46318416	T	intergenic_variant	MODIFIER	-	-	-	-	-	-	-	-	-	-	-	-	rs317300133	-	-	-	-	-	-	-	-	-
4:82213680-82213680	A	intergenic_variant	MODIFIER	-	-	-	-	-	-	-	-	-	-	-	-	-	-	-	-	-	-	-	-	-	-
4:82216997-82216997	T	synonymous_variant	LOW	GRK4	ENSGALG00000015645	Transcript	ENSGALT00000025226.5	protein_coding	15/16	-	1830	1596	532	P	ccG/ccA	-	-1	EntrezGene	-	YES	P1	-	PANTHER:PTHR24355:SF14,PANTHER:PTHR24355,Gene3D:3.30.200.20	-	-
5:38228766-38228766	G	synonymous_variant	LOW	AREL1	ENSGALG00000010270	Transcript	ENSGALT00000016704.6	protein_coding	05/19	-	900	594	198	P	ccT/ccC	rs312810934	-1	HGNC	HGNC:20363	-	P1	-	PANTHER:PTHR11254,PANTHER:PTHR11254:SF340	-	Abdominal_fat_weight+Animal_QTLdb+160520,Abdominal_fat_percentage+Animal_QTLdb+160525
5:38228766-38228766	G	synonymous_variant	LOW	AREL1	ENSGALG00000010270	Transcript	ENSGALT00000058902.2	protein_coding	06/20	-	1025	645	215	P	ccT/ccC	rs312810934	-1	HGNC	HGNC:20363	YES	-	-	PANTHER:PTHR11254,PANTHER:PTHR11254:SF340	-	Abdominal_fat_weight+Animal_QTLdb+160520,Abdominal_fat_percentage+Animal_QTLdb+160525

## Sheet: Table_S7
Table S7. Raw counts of reads assigned to family and genera after rare OTU removal.
Genera	01_N	02_N	03_N	04_N	01_A	02_A	03_A	04_A		Family	01_N	02_N	03_N	04_N	01_A	02_A	03_A	04_A
Streptomyces	3452	1579	2523	2619	4112	2863	2783	2765		Enterobacteriaceae	213	198	205	235	380	276	268	296
Pseudomonas	858	903	1218	1236	1777	1562	1708	1926		Comamonadaceae	106	95	204	137	224	330	254	184
Proteus	744	404	815	1274	1410	1458	1243	700		Bacillaceae	41	102	198	170	203	204	126	229
Halomonas	402	293	584	611	885	973	999	705		Mycobacteriaceae	94	90	102	134	192	162	133	156
Rhizobium	224	345	343	482	859	773	494	529		Flavobacteriaceae	66	60	75	65	112	82	87	102
Stenotrophomonas	476	185	477	510	629	635	598	443		Weeksellaceae	51	44	108	69	61	108	78	46
Shapirovirus	168	170	288	321	508	444	497	397		Streptomycetaceae	31	30	63	67	69	65	70	60
Corynebacterium	180	162	357	343	363	534	362	367		Rhizobiaceae	86	32	46	41	42	57	76	64
Acinetobacter	220	611	113	150	230	166	138	465		Burkholderiaceae	43	30	54	48	68	78	51	57
Aeromonas	167	286	219	229	341	253	245	340		Micrococcaceae	14	2	12	10	265	9	21	47
Bordetella	139	138	260	150	195	283	275	176		Myxococcaceae	31	18	42	39	55	54	43	59
Acetobacter	416	55	131	179	333	159	84	106		Pseudonocardiaceae	24	12	29	50	65	56	23	49
Shewanella	112	95	152	159	232	202	234	268		Phyllobacteriaceae	29	25	33	34	47	41	40	50
Mycolicibacterium	100	152	162	132	283	264	192	150		Sphingomonadaceae	46	19	24	21	36	77	31	43
Streptococcus	101	129	79	101	125	155	92	588		Partitiviridae	19	28	33	37	48	38	41	42
Bacillus	95	96	148	144	264	169	167	214		Microbacteriaceae	16	26	29	23	78	38	29	35
Klebsiella	83	111	153	114	230	199	184	223		Pasteurellaceae	22	15	20	16	33	23	23	92
Bradyrhizobium	112	75	124	141	166	136	120	160		Xanthomonadaceae	12	13	12	16	31	35	17	36
Neisseria	77	67	106	94	149	141	151	184		Lactobacillaceae	14	7	20	13	36	23	17	27
Clostridium	34	35	123	148	106	96	248	110		Micromonosporaceae	14	7	16	9	25	17	23	13
Rhodococcus	73	62	93	106	140	118	125	128		Alcaligenaceae	18	8	8	21	19	19	19	10
Mycobacterium	63	65	96	95	133	114	127	131		Propionibacteriaceae	7	26	7	4	10	14	11	31
Diaphorobacter	94	33	46	121	215	134	106	74		Bradyrhizobiaceae	25	10	10	6	14	7	20	13
Staphylococcus	70	33	58	88	136	111	96	220
Paenibacillus	88	53	102	106	125	94	83	143
Nocardia	52	60	91	75	128	120	110	120
Providencia	83	36	58	79	122	78	73	86
Burkholderia	48	42	99	50	82	134	98	55
Xanthomonas	54	34	79	55	100	97	78	105
Cloacibacterium	50	39	66	79	95	90	88	37
Microbacterium	37	43	58	62	119	56	64	97
Komagataeibacter	36	28	49	63	72	77	75	46
Chloracidobacterium	15	21	48	49	43	60	129	60
Thermoleptolyngbya	21	47	48	42	65	50	38	90
Enterococcus	30	26	41	43	68	79	53	51
Pantoea	30	24	30	55	57	40	59	91
Synechococcus	29	22	34	40	70	47	58	61
Vibrio	26	24	58	44	61	38	36	68
Mesorhizobium	28	33	41	40	37	39	58	63
Macavirus	20	40	36	28	46	46	36	79
Paracoccus	10	40	32	28	34	21	26	140
Bifidobacterium	21	17	27	34	50	57	56	67
Photorhabdus	0	25	45	35	101	48	31	42
Achromobacter	21	31	47	40	57	32	27	53
Serratia	20	27	30	29	48	41	48	51
Citrobacter	19	27	35	33	30	36	34	63
Ralstonia	16	16	32	36	57	36	35	35
Prevotella	20	18	33	23	25	32	40	70
Pseudoalteromonas	23	21	27	28	47	36	33	33
Cutibacterium	19	65	3	12	19	11	8	105
Varicellovirus	18	24	32	37	43	27	27	33
Bacteroides	14	19	24	23	46	31	28	36
Tomitella	22	17	16	26	40	37	26	35
Capnocytophaga	20	14	31	15	27	32	27	45
Sphingobium	26	16	23	23	12	52	21	29
Comamonas	10	24	20	20	26	47	25	28
Actinomyces	8	17	6	13	19	13	15	101
Pandoravirus	6	17	23	17	31	31	27	36
Pseudonocardia	19	15	18	22	25	28	26	31
Enterobacter	16	14	19	21	30	28	25	29
Chryseobacterium	14	9	25	18	32	30	20	26
Variovorax	17	7	21	16	32	23	32	20
Sphingomonas	13	10	8	17	36	47	17	18
Amycolatopsis	17	8	22	15	23	23	27	16
Thermus	8	20	25	20	17	15	12	34
Brachybacterium	25	7	14	23	23	27	16	14
Sphingopyxis	9	7	15	27	18	26	14	26
Deinococcus	16	10	21	13	17	30	8	23
Nocardioides	13	7	10	13	13	36	16	19
Acidovorax	7	11	13	8	14	30	6	37
Brevibacillus	12	8	20	14	21	13	15	21
Bastillevirus	6	4	13	11	20	19	28	22
Prasinovirus	14	8	12	14	16	27	15	14
Pectobacterium	6	4	15	18	22	15	20	19
Campylobacter	11	7	8	14	17	17	14	30
Rahnella	15	11	13	12	23	16	13	14
Brevibacterium	13	7	6	14	19	18	10	20
Nostoc	5	16	16	6	18	17	16	13
Flavobacterium	8	5	9	13	18	20	19	14
Arthrobacter	4	5	12	2	45	15	11	10
Methylobacterium	19	5	11	17	10	12	13	16
Myroides	4	14	26	9	13	12	12	13

## Sheet: Table_S8
Table S8. Venn Diagram results. Ensembl gene IDs in growth plate (GP) and articular cartilage (AC) at 21, 35 and 42 days of age
Groups	Ensembl gene ID	Ensembl gene Symbol
[35d GP]	ENSGALG00000040759,ENSGALG00000010259,ENSGALG00000043703,ENSGALG00000039376,ENSGALG00000001926,ENSGALG00000024428,ENSGALG00000044811,ENSGALG00000002103,ENSGALG00000041834,ENSGALG00000013948,ENSGALG00000032614,ENSGALG00000003324,ENSGALG00000035244,ENSGALG00000001603,ENSGALG00000040672,ENSGALG00000043435,ENSGALG00000044851,ENSGALG00000015877,ENSGALG00000046532,ENSGALG00000006856,ENSGALG00000003560,…	PERP2,CPXM1,COL28A1,DPT,HSPB1,C17orf67,TPPP3,AEBP1,RASL11B,CHAT2,PRRX1,NARF,IGFBP4,ITIH6,SH3BGRL2,C15orf48,CD151,SLC6A2,COL6A2,PTCH2,B4GALNT4,GFI1B,CNGA3,LOC396380,CUTA,GPR37L1,TTC32,LOC420516,TRIM24,VIT,GATA1,APOA1,CCL19,JAK2,ARSH,ALDH1A1,SPTB,H1F0,ITPKA,AVD,RBM38,ALOX5AP,TRAF3IP3,ADGRG2,PLCXD1,CRIP1,SLC10A4,AGT,TAGLN,UROS,TINAGL1,GABRA3,SLA,STAT5B,TLL1,ASPG,LTBP2,KIF1A,APCDD1L,PSD,ABLIM3,CIDEA,…
[35d AC]	ENSGALG00000022815,ENSGALG00000006323,ENSGALG00000016761,ENSGALG00000034150,ENSGALG00000019696,ENSGALG00000052026,ENSGALG00000047285,ENSGALG00000016669,ENSGALG00000014463,ENSGALG00000032854,ENSGALG00000023953,ENSGALG00000036925,ENSGALG00000002112,ENSGALG00000016285,ENSGALG00000004804,ENSGALG00000050327,ENSGALG00000044661,ENSGALG00000023436,ENSGALG00000006572,ENSGALG00000027165,ENSGALG00000002397,…	AvBD1,LECT2,LYG2,S100A12,CATHL3,CATHL2,SERPINB10B,BD7,DEFB4A,ACTN2,ACP5,CADM3,CSF3R,HDC,TNNT3,RSFR,PSPH,ACTA1,PDK2,FRRS1,PDLIM3,PTGDS,GIMAP1-GIMAP5,CCND3,LYVE1,MYL1,ITGA2B,SIK1,PIM1,PNAT3,MOV10,JUN,STOM,RAC2,CCR5,COL13A1,PGM5,TMC7,GSTA3,S100A9,SPIK2,AvBD2,TGM3,RNASE4,MMR1L1,RF00002,MMR1L2,EDN2,LTF,DPYSL4
[42d GP]	ENSGALG00000033198,ENSGALG00000009945,ENSGALG00000005077,ENSGALG00000004270,ENSGALG00000042279,ENSGALG00000014261,ENSGALG00000030175,ENSGALG00000015055,ENSGALG00000042289,ENSGALG00000013225,ENSGALG00000038433,ENSGALG00000001916,ENSGALG00000039647,ENSGALG00000006629,ENSGALG00000030211,ENSGALG00000010269,ENSGALG00000040866,ENSGALG00000011016,ENSGALG00000012802,ENSGALG00000014582,ENSGALG00000042511,…	MYO5C,CPM,F8,ALDH1A2,CYP24A1,FBXL2,SLC22A16,SUSD5,VAT1L,SPON2,SLIT3,RBP4,KIAA0408,KCNAB1,P3H2,F13A1,CADM1,PKDCC,SQLE,SCUBE1,BMP7,CSPG4,SOX5,SNCAIP,TMEM26,PXYLP1,COBLL1,SLC39A8,CYR61,CAPN2,TMEM163,CHRM4,PHEX,DDIT4,SLC38A3,LGI1,EXTL1,OMD,RASSF10,ROBO2,INTU,CYP51,LPAR4,MSMO1,WFIKKN2,JPH1,ATP2B2,GFPT2,PLXDC1,SGMS2,TMEM45A,INSIG1,RASGEF1C,PRSS35,AKR1D1,SATB2,SORCS2,PLXNA4,CSGALNACT1,IL17B,PCOLCE2,CD3E…
[21d GP]	ENSGALG00000045153,ENSGALG00000011663,ENSGALG00000003179,ENSGALG00000011058,ENSGALG00000049529,ENSGALG00000003138,ENSGALG00000045154,ENSGALG00000012542,ENSGALG00000015152,ENSGALG00000005985,ENSGALG00000054344,ENSGALG00000012362	SHISA3,FNDC1,ANGPTL7,LEPR,OXTR,COL16A1,RASD2,BOC,GDF10,THSD7B
[21d GP] and [35d GP]	ENSGALG00000015253,ENSGALG00000028459,ENSGALG00000032220,ENSGALG00000027184,ENSGALG00000006821,ENSGALG00000054999,ENSGALG00000017191,ENSGALG00000027655,ENSGALG00000017295,ENSGALG00000037675,ENSGALG00000007419,ENSGALG00000015307,ENSGALG00000041501,ENSGALG00000015101,ENSGALG00000026836,ENSGALG00000032856,ENSGALG00000009755	COL8A1,FAM180A,ELN,OLFML1,TNMD,ANGPTL5,TRABD2B,PTHLH,COL14A1,MASP1,ABI3BP,AMER3,BNC2,GFRA2,LRIG3
[21d GP] and [35d GP] and [35d AC] and [42d GP]	ENSGALG00000014686	FBN2
[35d GP] and [35d AC]	ENSGALG00000026948,ENSGALG00000011190,ENSGALG00000004170,ENSGALG00000040279,ENSGALG00000016684,ENSGALG00000003212,ENSGALG00000036805,ENSGALG00000000378,ENSGALG00000039978,ENSGALG00000028357,ENSGALG00000009479,ENSGALG00000014736,ENSGALG00000044326,ENSGALG00000003845,ENSGALG00000007447,ENSGALG00000021230,ENSGALG00000019384,ENSGALG00000013575,ENSGALG00000029857,ENSGALG00000045115,ENSGALG00000030247,…	ADD2,ADA,RHCE,RHAG,TSPO2,SLC4A1,MKNK2,TUBB1,EPB42,MAPK12,TMOD4,RUNDC3A,CPN2,MYH15,EPX,SLC25A37,IFI6,RNF213,TF,HBE1
[35d GP] and [35d AC] and [42d GP]	ENSGALG00000043254,ENSGALG00000014835,ENSGALG00000003594,ENSGALG00000042105,ENSGALG00000002192,ENSGALG00000039269,ENSGALG00000041693	C7,ANK1,PLCB2,PTPRC
[35d GP] and [42d GP]	ENSGALG00000027207,ENSGALG00000046358,ENSGALG00000005554,ENSGALG00000026613,ENSGALG00000027887,ENSGALG00000003473,ENSGALG00000008440,ENSGALG00000015015,ENSGALG00000036142,ENSGALG00000012407,ENSGALG00000001768,ENSGALG00000034067,ENSGALG00000009693,ENSGALG00000043035,ENSGALG00000044675,ENSGALG00000046192,ENSGALG00000010664,ENSGALG00000000402,ENSGALG00000040264,ENSGALG00000022871,ENSGALG00000037011,…	FBLN7,ADIPOQ,SFRP1,CHST1,CYTL1,LRP1B,TENM2,FMOD,CPXM2,SHISA2,KIF26B,LOXL2,C2orf82,STAT4,ANO6,PNPLA2,STXBP6,TTC38,JAK3,GPC4,HTRA3,THBS1,MMP27,MELTF,NLRC5,CCR7,IL7R,PDK4,ANO1,SCARA3,CPAMD8,G0S2,FYB,ADCY2,ANGPT4,RBP7,RASGEF1A,EPS8L2,P2RX7,WWTR1,IYD,PLIN1,C11orf96,TNFRSF11B,PTCH1,SREBF1,SLC26A2,MOXD1,SCD,GMIP,ETV4,AIFM2,FABP4,MLPH,PDGFRA,PRSS12,SLC22A3,TNFAIP6,PSTPIP1,GDF5,CHADL,COL20A1,DOCK2,MYB,ZP1…
[21d GP] and [35d GP] and [42d GP]	ENSGALG00000005253,ENSGALG00000006757	C1QTNF8,XYLT1
[21d GP] and [42d GP]	ENSGALG00000032161,ENSGALG00000004722	SCUBE2,ASPN
[35d AC] and [42d GP]	ENSGALG00000024272,ENSGALG00000019553,ENSGALG00000008306,ENSGALG00000004418,ENSGALG00000000558,ENSGALG00000004286,ENSGALG00000002643,ENSGALG00000038225,ENSGALG00000032239	FGL2,SSTR2,SLC1A6,SEMA3E,GCHFR
[21d GP] and [42d GP]	ENSGALG00000032161,ENSGALG00000004722
[35d AC] and [42d GP]	ENSGALG00000024272,ENSGALG00000019553,ENSGALG00000008306,ENSGALG00000004418,ENSGALG00000000558,ENSGALG00000004286,ENSGALG00000002643,ENSGALG00000038225,ENSGALG00000032239
